# Supplementary material for: Key Gene Network Related to Primary Ciliary Dyskinesia in Hippocampus of Patients With Alzheimer’s Disease Revealed by Weighted Gene Co-expression Network Analysis
Source: Research Square preprint supplement (doi:10.21203/rs.3.rs-997410/v1), 2021-10-27
Supplement: Supplementary file 1 [file 26f88c764eded386a0584670.csv]

Genes	GSM1176211	GSM1176212	GSM1176213	GSM1176214	GSM1176215	GSM1176216	GSM1176217	GSM1176218	GSM1176219	GSM1176220	GSM1176221	GSM1176222	GSM1176223	GSM1176224	GSM1176225	GSM1176226	GSM1176227	GSM1176228	GSM1176229	GSM300168	GSM300169	GSM300170	GSM300171	GSM300172	GSM300174	GSM300178	GSM300182	GSM300185	GSM300187	GSM300190	GSM300193	GSM300197	GSM300205	GSM300209	GSM300215	GSM300219	GSM300223	GSM300227	GSM300231	GSM300235	GSM300239	GSM300243	GSM300255	GSM300262	GSM300268	GSM300272	GSM300276	GSM300280	GSM300286
A1BG	-0.542729483443861	-0.869666650917268	-0.89435540991291	-0.637141297319038	-1.0806168055381	-0.45240184905513	-0.942817709470752	-0.794575056726871	-0.566757529325157	-0.904618252897267	-0.894736991176924	-1.10065590159493	-0.505995034415772	-0.84467333601392	-1.09006729799082	-0.982752985691581	-0.960574220543029	-0.478570776968267	-0.949491984194869	2.06880399735359	1.86501159413976	1.87015589815563	1.59463901041716	1.75975996421871	-1.02845460576614	-1.01499041158701	-1.19334473707458	1.92693842378967	-0.907080559618879	-0.898896721229897	-1.04032466580032	-1.1153183735212	-1.20854395694072	-1.20509861595798	-1.08617869867887	-0.177779031677593	-0.618022656364315	2.24416553583783	-1.14200764285768	-1.15152325447	-1.01786795526319	-0.0546622130543778	1.34979328680135	1.62073177911522	-1.1993575550937	-1.0663099813351	-0.476336486209568	-0.608751730277294	-1.15897085391519
A1BG-AS1	0.131991058992819	-0.363740755559304	-0.507765268045682	-0.0219863040699079	-0.769229905275341	-0.550163930408865	0.435067270591352	0.305587249323077	-0.684400448914279	0.333664655274679	-0.17470392283214	0.157640296496354	-0.258550023734235	-0.269720353685892	-0.643605701648004	-0.323778808377605	-0.589488479083837	1.2365717180216	-0.63480247349453	0.167806484443959	0.327849028243863	0.0920104512444719	0.273291709636072	0.349100422258943	-0.323859652916174	-0.615348103585304	-0.81214898910609	0.505377836011522	-0.582845306350642	-0.265693693530752	-0.576369058132761	0.168770272087517	-0.318985120387641	1.29502151929684	-0.503153666914734	-0.41997286079821	-0.663928934437625	0.324460384952371	0.407700604291794	-0.502969798146105	-0.334362983404017	-0.384437041823034	0.282917973905777	-0.0146254098267086	0.0571437201348141	-0.421291663507368	-0.734141809480603	-0.32526224698495	-0.297587858187757
A1CF	-0.591417168382446	-0.513628273997512	-0.627290398627207	-0.616547459355723	-0.569653935753921	-0.4520212114618	-0.596425642107396	-0.402473336172571	-0.55646203439716	-0.351805541676838	-0.118490334490745	-0.815846978904691	-0.508871339710318	-0.533574863958767	-0.552925996019322	-0.117252450833769	-0.74551363525736	-0.538593908506134	-0.760708059938754	-0.661634874250933	-0.668988844836805	-0.657522283310902	-0.736804254066244	-0.614902111621478	-0.771229439658055	-0.715833954688757	-0.647237592518566	-0.639275069471751	-0.660170091309889	-0.483325159998433	-0.687993451156846	-0.593313535742525	-0.7622491612284	-0.662911433075154	-0.672098015600465	-0.791257158813154	-0.652484042990281	-0.675599647147311	-0.764047213068174	-0.676636167306413	-0.783831170228472	-0.567002575519466	0.0262787797542251	-0.285117191709356	-0.78029856432162	-0.616231042539354	-0.783489995261123	-0.769457967429092	-0.808817012834247
A2M	-0.712497925955928	0.114690810753777	0.0191191899910842	-0.215383452305929	-0.754478383896636	-0.0493807948595469	-0.581835151750546	-0.123835438427544	-0.0708601270346256	-0.755439252745706	0.218272443034135	-0.419168611043528	-0.131994158980376	-0.275228155752656	-0.687771393256269	0.181448915859264	-0.165564450703922	0.0210298732083402	-0.123676648015149	-0.25151799917834	0.113580764036244	-0.0609442732267913	-0.0549182383190145	0.241342797645392	-0.605453214472342	-0.570346229954721	-0.722337062864235	-0.112112825404084	0.0586951601393134	-0.477036641545207	0.0337817539440285	-0.422098681643192	-0.633447411433396	-1.53510035487818	-0.126006839254191	-1.72039507134164	-0.871440830912075	-0.00733403736348921	-0.0966070149931763	-0.0868112799977849	-0.50618048354871	-0.188613703164774	-0.337101368134131	-0.850711019332963	-0.247795320781924	-0.0824909277648768	-0.444961553857374	-0.422914378087364	-0.483238117323096
A2M-AS1	0.559674824107918	0.674262949775519	0.889063013221348	0.46056547578526	0.827486836742889	0.13960411111188	0.171979656619626	-0.164227962463971	0.57262945851183	0.645451980178863	0.439144613931504	0.810270787917914	-0.0406895847333824	1.16211099434555	-0.575516861687643	-0.129511845573257	0.170470184277596	0.692083379232607	-0.646999140667991	-0.528308107013199	0.278188937473527	-0.453911199980808	-0.796473877173823	-0.171947900973391	-0.373419573952572	0.258765809678142	1.03267258681785	-0.398639571613451	0.386553464082579	0.798445074581378	0.156024403104766	-2.16766931337921	-0.947174830645337	0.0665565778394756	0.720092221571419	-1.00199392991011	-0.525482030467382	-0.460431350755055	0.474172310466389	0.222773758575294	-0.728772925416773	0.655649678546373	1.21034392656502	0.496498188978559	0.188305949142615	0.250487158639329	0.123113545416782	-0.535303698237788	0.690387445102008
A2ML1	0.62956027006929	0.328575015907232	0.329259755441449	1.20076241370839	-0.355502301129214	0.0911479393681088	0.790346459523759	-0.441943970832014	-0.175415055021028	-0.0276164039290453	-0.147980254296017	0.684445694642462	0.400631748922922	-0.437691578055919	-0.719798760050234	0.301775309927119	0.902885478774756	0.375077126551767	-0.651017134877097	-0.534472737450885	0.157862935346173	-0.447313142861313	-0.768419005733329	-0.405783569559479	-0.430625715869707	-0.436473009605985	-0.390165294819018	-0.404958349705165	-0.0698518831888641	-0.693847014760043	-0.216003905041413	-0.730650100265303	-0.165661836035879	-0.323924272019552	-0.229371436364027	-0.892131308274015	-0.615689741761244	-0.489905802531209	-0.890342652248988	-0.596795398197874	-0.865698016692307	-0.484488352747271	2.10953210770358	0.688069707101552	-0.582983950544264	0.268535526045769	-0.850104375667629	-0.996508598113862	0.050390959533486
A2MP1	-1.38112237392147	-1.19348263668829	-1.28777972327146	-1.40419960277037	-1.40419960277037	-1.2079325626182	-1.31475349259856	-1.12931331903209	-1.2116528078703	-1.24308225401566	-0.907125561906793	-1.45598533044923	-1.28061349639769	-0.826375728507818	-1.42316029527322	-1.33592277482925	-1.32006762928482	-1.29502954020833	-1.40962684589869	-1.63013471505366	-1.61843925003983	-1.62768421490711	-1.62381845861521	-1.50740749843974	-1.50488955628005	-1.5180115113096	-1.50502340712927	-1.62531894881783	-1.36113305821436	-1.27467704762268	-1.43919064925065	-1.40260500134079	-1.53846824810431	-1.50602697768137	-1.44264193773205	-1.53330273247666	-1.39853705021628	-1.60114160665479	-1.48673160932384	-1.47011964623818	-1.46904165492518	-0.93619094940395	-1.25730192661161	-1.58019890496353	-1.52607204169607	-0.962291870468468	-1.45886839894563	-1.49055407831014	-1.49215605788028
A4GALT	0.261247043546759	-0.0212579101570694	-0.097116042372372	0.0199807935194303	0.0417860717083251	-0.0322501437279578	0.156774752070859	0.899990798940709	-0.0951339987652955	0.0887685522755522	0.0366687242248991	-0.0714813075831393	0.522615924834027	-0.0524244975857338	-0.0105021313644952	0.36244631487798	-0.0444560580073929	0.13599730545437	-0.021181229765298	0.00348503946848203	0.0107916837809801	-0.00930145684343436	-0.0440224047577685	0.106942100938488	0.113967241232403	0.110284514264264	0.143029779496775	0.0524910932000019	-0.0189876230768723	0.0895793298019	0.026648706858388	0.102017141095519	0.119044798939004	0.241704635922398	0.0355403075686497	0.0569812654956095	-0.0140126195777786	-0.0119266027221885	0.100037617103234	0.138720280609098	0.0876961031155621	-0.00286128822913296	1.76317135351069	1.8753618582581	0.184510955248328	0.0821896335222927	-0.276758474727421	0.0779306606751364	0.11211329020958
A4GNT	-1.02847387861971	-0.863704077332171	-0.892740900892967	-1.01667956621668	-1.07250967962681	-0.871582270910745	-0.928151902756133	-0.773235260683596	-0.858444824609362	-0.832305617240598	-0.820461116428671	-1.11381948761122	-0.910222169539464	-0.831918522306917	-1.10471572503762	-0.9847549114239	-0.966633039006351	-0.926469945833671	-1.03598738344441	-1.25461671749216	-1.24424431289376	-1.25469261268141	-1.23176072329509	-1.29303003396917	-1.17187224206678	-1.14492712593548	-1.18507603269979	-1.2620888921017	-0.980201437339849	-0.843678663010013	-1.09250246932447	-1.0385419964129	-1.19957905638816	-1.19464461388356	-0.952412061102049	-1.13694974238359	-1.05995529441714	-1.11579828974346	-1.13807427339943	-1.13834259766699	-1.02430911266472	-0.91658666364654	-1.28483793851573	-1.56448957324447	-1.19221626076965	-1.05868284000334	-1.02999486454051	-1.12641489849737	-1.17195703291927
AA06	-1.20897342988056	-0.695489775476782	-0.680185569049235	-1.26224303040181	-0.860594845719615	-1.15986568828986	-0.785030739445168	-0.261852278140184	-0.835631743235301	-0.413019308357632	-0.396143549556229	-1.04022657582343	-1.126390499573	-0.35969095057932	-0.933868789933112	-0.80007805843209	-0.933868789933112	-1.19273837115159	-0.915545143450152	-3.11646632743306	-3.02146836473865	-3.02146836473865	-2.70885500296438	-2.53934218784817	-1.1460646663119	-1.2345356445156	-1.12248587535803	-3.11646632743306	-0.770501470503937	-0.775542411340929	-1.09397177170603	-0.999774304474415	-1.15648473724859	-1.0300835134656	-1.05910327083351	-1.23215567769809	-1.01178114208477	-2.83998401933801	-1.05546091175795	-0.886706218008735	-1.09432475818945	-1.02567961746935	0.611357512380232	0.695030358200482	-0.861968652943579	-1.12837127612626	-1.02829332370142	-1.10195830838361	-1.16873201925184
AAAS	-0.326931969501328	-0.241178954819178	-0.0473225533609829	-0.184739402922525	-0.100914328538975	0.0782600481065712	0.12227539625669	0.19330624135599	0.0583236270387336	-0.223197478104401	-0.238955734097138	-0.157150147415874	0.368025270647379	-0.0123554593591799	-0.322324771706562	-0.217051416631287	-0.310218866659388	0.206705955899797	-0.540413801606333	-0.555915063946254	-0.459303367712851	-0.4609737377689	-0.618445980636745	-0.819338653138507	-0.893699157508415	-0.186374368474262	-0.0883578898010808	-0.2826726405362	0.1033072611918	0.241342797645392	0.0219484888851264	-0.676024422317965	-0.824492774283363	-0.0973207008981109	-0.0525042028133036	0.186376483567996	-0.201677797115844	-0.410503151997447	0.0421995756408866	0.0139864768466495	-0.186703663222778	0.302070856243078	0.0565090988574028	-0.0506371394527471	0.227914191816989	0.260468706530648	0.033341913119489	0.178774318588077	-0.244473070901448
AACS	-0.417351027482354	-1.60179508584229	-1.16206634209745	-0.375214039552168	-0.133176455829296	-1.55090573065588	-0.901771413522424	-1.82296525749413	-1.04119021271529	-0.874692497081569	-0.998039477356665	0.386242798769202	-1.17981359606349	-1.36639993773446	0.235654682788383	-1.26894369232205	-1.03507120352259	-1.4430826859271	-0.295123550751399	-0.0814674218514857	-0.267376452132714	-0.0309159402598886	-0.229657856102809	-0.0814674218514857	0.799362405138108	-0.472132142825049	-0.16179992674478	0.0322872692404406	-1.22339769971986	-1.04586786249208	-0.994024684814598	0.829837500876303	0.161902169946279	0.890655452701129	-0.703325331666624	-0.304335901602585	-1.21545464402408	-0.136101495054592	-0.618653154727716	-0.549694374334025	-0.672790745671549	-0.955767195789422	-0.690809174466224	-0.28369689640332	-0.0552419131746803	-1.01635601347595	-1.16552417666691	0.363748256719609	-0.412730669549822
AACSP1	-0.332977946095661	-0.318224834793436	-0.491865774335565	-0.549451361309756	-0.318131793713012	-0.384920740858362	-0.44384753997551	-0.234894670779038	-0.443342361138519	-0.319324738539382	-0.295052007058353	-0.630961190551464	-0.451210247798626	-0.339148956344621	-0.599482221516269	-0.222124096436125	-0.565541446847004	-0.496187273459541	-0.323081396373169	-0.818215831740042	-0.824354791679976	-0.7622491612284	-0.815440383696459	-0.662667688505762	-0.159167653077774	-0.429760870235675	-0.384437041823034	-0.819097872687348	-0.383894181329466	-0.339124830555558	-0.551435102816431	-0.353536669437467	-0.315213874038026	-0.325034471681981	-0.505089194196371	-0.466482804558705	-0.611829522195589	-0.969901114182324	-0.504522648410078	-0.565737237048545	-0.648147046792881	-0.40847875719543	-0.0199798235687576	-0.462145203968683	-0.484285803153227	-0.338719805909136	-0.759874701002464	-0.385121903252228	-0.500941778226829
AADAC	-1.43757979175969	-1.21098839582376	-1.29273462174932	-1.38625926476509	-1.42380374053175	-1.22652412022996	-1.32237613378054	-1.10699607142665	-1.25041707964289	-1.27712443500174	-1.24474836242243	-1.4906672347917	-1.25981342966337	-1.18800270720655	-1.46657383073075	-1.36965548884323	-1.3728111890736	-1.27857063400991	-1.41064058071132	-1.62840457117953	-1.63343600353914	-1.62733136867193	-1.63542602238672	-1.62935440616104	-1.5413748448113	-1.54774216513325	-1.52144650664639	-1.63193436002542	-1.40768934032061	-1.27792445229144	-1.4504952169494	-1.41275560584741	-1.53934321982916	-1.47900718983538	-1.48095743159654	-1.22871438929671	-1.46721238740276	-1.64787789657449	-1.51519500656705	-1.48775729030249	-1.51123333251463	-1.32972949875386	-0.593687262513841	-1.10237142648341	-1.54550650510963	-1.43173049746844	-1.45129884359836	-1.51326007449084	-1.51962669913989
AADACL2	-0.810454837763847	-0.715316489992499	-0.852231403776173	-0.908220734194804	-0.876679877128416	-0.755334441471337	-0.816711352433713	-0.572655508641289	-0.773154615802685	-0.68906224488808	-0.700465722955547	-0.997305151218951	-0.778495292902778	-0.699561122172878	-0.959550472272823	-0.715621178934901	-0.885376382854449	-0.826984034282268	-0.948864305125378	-1.22402865110839	-1.22167913932553	-1.22636372902307	-1.22670674587056	-1.21658193956318	-1.02024475215202	-1.0071490196202	-0.973131128444772	-1.21220629522537	-0.912519823159262	-0.701546177036262	-0.937637202226429	-0.832725597008974	-0.964000862328894	-0.913256857250483	-0.950026106044071	-1.02473116169046	-0.914584897629507	-1.22999547230504	-0.985222644492952	-0.967279326073824	-0.986660834883784	-0.806795890531521	-0.448834472326738	-0.799253020540513	-1.01338897281108	-0.887391911826529	-1.0262855852671	-0.990629218194605	-1.01407974151416
AADACP1	-1.47332103919317	-1.31626177588974	-1.38448899060093	-1.56762611237128	-1.56762611237128	-1.29635108006108	-1.43757979175969	-1.250278279318	-1.36368449116278	-1.42040180366085	-1.37575677841731	-1.66414328687431	-1.37611700537094	-1.28732752231548	-1.63200315875335	-1.50601049780335	-1.49295364409398	-1.40962684589869	-1.56868776657662	-1.74999964192016	-1.75454992468178	-1.75828771891251	-1.73729400899886	-1.7533112781813	-1.65246327356862	-1.67643229669235	-1.64078423684008	-1.74370739277202	-1.51135735484114	-1.40948029353625	-1.55246699601499	-1.53619298108732	-1.65297104363265	-1.64863767951876	-1.60490075314765	-1.67125469166434	-1.55666545631334	-1.75970051959326	-1.62822181026317	-1.59016949679496	-1.62305321818884	-1.44575158854839	-1.37559647599457	-1.69132905679377	-1.66448633157781	-1.54373321230802	-1.54810209482311	-1.6412265003431	-1.63375180779244
AADAT	-0.997305151218951	-1.02336945940414	-0.0241577467287854	-0.783728063700519	-0.0546058626214105	-0.0197542906623568	-1.14211275352204	-1.36462298652212	0.180827293699894	0.017340067583216	-0.696292758273145	-0.524522260530561	-0.097116042372372	-0.0944825417778087	-0.849084430657481	-0.343641662129482	-0.817225447935734	-0.111460864466073	-1.07574848817305	-0.402821021363831	-0.579600774847041	-0.575422537606005	-0.610571347640803	-1.0414776091607	-0.857371200127705	-0.103153864986952	-0.12037994460897	-0.953248936010531	-0.108767875083369	0.022447628878751	0.00689380812401318	-1.36818604535361	-0.722856013479738	0.0682007643308859	-1.1791715414491	0.371673639680122	-0.106943768780682	-0.290551752723036	-0.138217867021218	-0.752170557914521	-1.3466403949996	-0.197999186916149	-0.221211902716491	0.189169232262625	0.0891314266065379	-0.157447622869411	-0.281377141317242	-0.203199869935666	-1.19397911002051
AAGAB	-0.753152115967584	-0.618312193735492	-0.50801241810033	-0.557527582196849	-0.490299186401913	-0.735645952814298	-0.855051650187604	-0.90876351076192	-0.568869920368728	-0.501324771881801	-0.732465535910884	0.0420984137351926	-0.190417605217599	-0.883077848196589	-0.507765268045682	-0.71743577742514	-0.351607701355809	-0.666569766434811	-0.685977092489503	-0.523534877522062	-0.658143709061277	-0.601604166855466	-0.583414982637992	-0.672884710874127	-0.504894776760304	-0.735149454796981	-0.540470338943135	-0.465179121240963	-0.485633778180488	-1.03960464151654	-0.842553854429647	-0.426742258864724	-0.429470707277706	-0.447116876312477	-0.558316673460525	-0.591554991882356	-0.211248533507703	-0.55642259354579	-0.446954282548272	-0.557502811812117	-0.571560559568946	-0.169524149819596	-0.481278477206236	0.214770815210346	-0.608689073074329	-0.722203810909389	-0.252992737324837	-0.611829522195589	-0.343010916969062
AAK1	-0.187802386858697	-1.20710191125455	-1.22744251254215	-0.598987026096006	-0.394910919675111	-1.68047487531823	-0.665552983578926	-1.34000770748158	-1.13884831082548	-0.773767347831965	-0.819168941809302	-0.258255193761451	-1.23322836122266	-1.15472689029604	-0.34538960647102	-0.667218158201159	-0.730491200676011	-1.20979062603806	-0.447835902954075	-0.345714738502874	-0.340241287816876	-0.243275720604255	-0.335029910864434	-0.321116064795791	0.204403354923636	-0.527586053982303	-0.361825585068358	-0.192389944077201	-1.111676929512	-0.711477129219754	-0.853941787130611	0.446484076913071	-0.361020747681619	-0.0810284998557301	-0.600447258394278	-0.342088483540043	-0.600028880518004	-0.510258986862873	-0.533349635711227	-0.331544137848047	-0.562759341907039	-1.08859737433757	-0.453115033060327	-0.186500239419624	-0.44476949688412	-0.501507483296279	0.00247788344994728	-0.598916206004499	0.126737092494045
AAMDC	0.185027732605144	0.286983836997043	-0.0526413716145362	0.0541541281950164	0.224370876437409	0.170470184277596	0.276778377959632	0.493025866561073	0.486155742378654	0.395905542281133	-0.0130379392021613	0.203485479759535	0.506766915518567	0.425402669753325	-0.15750668578413	0.172725242538585	-0.0421266622515292	0.561141486276159	-0.156202877437174	-0.341420190337028	-0.313013054244914	-0.237225713810672	-0.278668736304418	-0.261279784014782	0.0591838015374391	0.526287958514214	0.287738564083211	-0.229800882172168	0.166280288318372	0.280116432393007	0.278887918592477	-0.377854424913645	-0.628818321595732	0.164161924786814	0.492127786028276	0.451816396068405	0.394958928971842	-0.109255638759242	0.482356558027705	0.181116476282395	0.291860250549743	0.468352616208858	0.15873806497957	-0.189475565699396	0.422674717573775	0.563856463140277	0.302484273061018	0.480611377789496	0.349596636640032
AAMP	-0.257245455419434	-0.420396363596592	-0.145509284162917	-0.11703562835777	-0.297490024534001	-0.294539538273686	-0.198195330741663	-0.440775629018027	-0.0976376895562195	-0.343557784026173	-0.969814481972071	-0.0140147530573309	0.129199236884363	-0.184497070844958	0.421967755198397	-0.456606647658824	-0.325317726699501	0.104287410555696	0.271807346229178	0.39813896850544	0.109761063751183	0.337715945772279	0.507934689099124	0.182653381668983	0.0426508687525954	-0.247105557950811	-0.207244434280266	0.321932420164953	0.0227508547928677	-0.112668684219735	-0.0452598739839037	-0.00380092021721761	-0.0527747932516473	-0.274649275306269	-0.185357948709767	0.297660507046602	-0.335205360769524	0.217419359064389	0.038700528160642	-0.191247448547383	0.166916027847536	0.0646365441945839	-0.39720585605927	0.0142264357591878	-0.155078734242664	-0.523324252318089	-0.0204809970862487	0.202546264767297	-0.0483025331543232
AANAT	-1.31020034597058	-1.09721743908887	-1.14017833973823	-1.28347817348662	-1.30024718045462	-1.13281688992014	-1.1765783100966	-0.671697175305859	-1.1068612101975	-1.16383342380563	-0.944852186367337	-1.32316269693183	-1.17494987764264	-1.07241696791957	-1.31054465881501	-1.23004944446477	-1.24940140256595	-1.18330363901403	-1.27372027082423	-1.50919692974671	-1.49412535550482	-1.52172863853016	-1.48873032042625	-1.50740749843974	-1.1157049751161	-1.40970361590589	-1.41047506746736	-1.54048576311871	-1.26350535637011	-1.1726395915577	-1.30532218374363	-1.29933340408712	-1.42723379378031	-1.3938778444683	-1.34530894587863	-1.41605032435163	-1.30561378777654	-1.49840362865967	-1.3837588127437	-1.37113615583195	-1.36056244174317	-1.1721007013959	-1.16704073348372	-1.44264193773205	-1.42246069139093	-1.30278390182285	-1.29356296604459	-1.37972562387791	-1.38330360618521
AAR2	0.054226907680308	-0.0684523923551026	0.371011467064991	0.398026464185036	-0.404280991769056	-0.0830194630311479	0.074820118252294	-0.391681982832081	0.35586390938797	-0.409865406425583	0.284815946268712	-0.0769008195587646	0.173264199390542	0.377817907498718	0.127232178563377	-0.0074858156502259	0.193964129540621	0.120680459773748	-0.129229355845067	0.200309735725113	0.0560923759609405	0.0899978219276086	0.364605966905303	0.118499432237716	0.171485863308887	0.354925849677391	-0.340241287816876	0.286704595487007	0.428500058209552	0.303627714411605	0.336611402882914	0.108649195001473	-0.157447622869411	0.34935799693335	-0.00301077538160672	0.632367990221613	0.302346313006713	0.150086974054404	0.49380468030043	-0.0293192537484164	-0.266866914085748	0.45146573000354	-0.0908185212892384	0.218698493492065	0.0174019919826672	-0.154875717150205	0.525563696642686	0.280443360022827	0.153484476787082
AARS	0.00641076175892659	-0.299529220085621	-0.387784879507724	-0.139574414965839	-0.828994235055223	-0.170660832815098	-0.231448653386536	-0.484959300171513	-0.0777840534951945	-0.525619658800587	-0.230555198477477	0.156702835273878	-0.492126464478348	0.0379951229075766	-0.220116427605766	-0.374958874409061	-0.309526066971329	-0.344937332839475	-0.391859050178522	0.0291091065672044	-0.231286597121815	0.118982156615617	-0.00643094342135732	-0.248618924110845	-0.13466880248926	0.0662520843854098	-0.863105461287858	0.228311913215243	-0.0778373868374437	0.368904765455084	-0.15342655268136	-0.151053579891403	-0.25557007924265	-0.441039042935737	-0.184487033105744	0.026648706858388	-0.625400338154123	-0.181312152735805	-0.192255211891811	-0.262387025065611	-0.130870186618499	0.114691031528623	-0.572563401135819	-0.355527954798905	-0.0300143015241868	-0.445433911757944	-0.113448214511036	-0.0119266027221885	-0.342403974035406
AARS2	-0.0810189140356815	-0.141912710403972	-0.0692721358889067	0.0782600481065712	0.289042452880179	-0.234421796694166	-0.397176757869717	-0.51268202942276	-0.0610665240965646	0.18729716449605	-0.320165010900397	0.00959320869512665	-0.065750778913689	-0.196460974437301	-0.109478156889706	-0.417973700469328	-0.20942786588835	0.0996644164511784	-0.0623371746059562	-0.0751134894606946	-0.017451886414996	0.0232118835838066	-0.0470449193708567	0.313393406015771	0.0606852347467677	0.120117461826258	0.355374988406851	0.0971789858478039	0.110211968167472	-0.138473453271634	-0.153777833623818	-0.154228968633585	-0.348809555656215	0.12753862235156	0.0353616551785515	0.235343404122169	-0.175737161412161	0.171946292794286	-0.0633790877742967	-0.110577159034754	-0.0803983430490439	-0.0893969543952193	-0.312321425503423	-0.538356779153515	0.0242789464205982	0.137893964759886	-0.201970213333818	0.252706791025633	-0.120329046380456
AARSD1	-0.879961744163847	-0.921323630545788	-0.75243517872415	-0.99121297388171	-0.171730197001497	-0.867991012960134	-1.07372288122311	-1.60286437040691	-0.522132581779876	-1.13884831082548	-1.17624862412138	1.10252840958651	0.0150316152312737	-0.962763007637608	-0.172012952798299	-1.10124962689905	-0.760859110507292	-1.25152431729409	-0.0913702323990847	0.0337817539440285	-0.243527186379654	-0.0210575350356824	0.257909948891585	-0.380689346773401	0.48949311986879	-0.243786995864394	-0.283760263387339	0.263729367238588	-0.946544123237625	-1.35585567620423	-0.536578377216086	0.252233417543696	-0.348884658075957	-0.115091247315541	-1.03646413802553	0.457182216145857	-0.373286774472451	0.0375122101858782	-0.551235364910757	-0.466689565085155	-0.541176010082246	-0.588592389076484	-1.64514320322076	-0.400359350088954	-0.17518619833679	-0.781396989878272	-0.0138954686981529	0.0256617534702984	-0.64901597773096
AASDH	-0.115814519740429	0.432131901195152	0.240645727270295	0.348711374601422	0.542861913909284	0.346384945032977	0.472363160969208	0.156535591715553	0.589698512534819	0.329687921211187	-0.208632938380034	0.344142509668696	0.372053499614725	0.274533572236152	-0.554234521988193	0.198330986108447	-0.0140561509688543	0.569526075157208	-0.6245625280288	-0.451450287747449	-0.213639702261249	-0.354792455420012	-0.514649233498251	-0.401898465095798	-0.0760277018109807	0.0484779198359889	0.720092221571419	-0.111058258615355	0.484325110361362	0.157385217000585	0.338699280977424	-1.0261986148788	-0.189261168665539	0.0718721953335439	0.501892037100531	-0.0140988563374809	0.237637552367669	-0.0907009491345294	0.22699428822436	0.0529964966271603	-0.315720430924856	0.376296140100393	0.167012373185896	0.0576183434614511	0.0581271923624339	0.0488841147679212	-0.309722107633608	-0.325942886975432	0.210617232300183
AASDHPPT	-0.710514297404621	-0.948864305125378	-0.898160898776351	-0.729469120319514	-0.534034932552572	-0.573098122516288	-0.462664991447668	-1.07840048218809	-0.537778508455972	-0.775322630927919	-0.769394294665101	-0.18838827564779	-1.03619653587689	-0.483109647903808	-0.607655947672728	-0.473202472742976	-0.62471806326758	-0.654988626130763	-0.511194650317639	-0.656413059978656	-0.681317387964481	-0.778176108981571	-0.695853704680017	-0.645497580010095	-0.246335475546372	-0.55599791733394	-0.557012569355324	-0.586006674148964	-0.61499923016671	-0.537438416092969	-0.460632755793538	-0.737874797094302	-0.111801011118887	-0.29188040967556	-0.538614176996915	-0.411308314817634	-0.49956188462117	-0.620298264738043	-0.439675681100151	-0.674160691654046	-0.542784045952883	-0.301730663350632	-1.15337064967193	-0.224617099089215	-0.61499923016671	-0.902769673814284	-0.135554509023461	-0.350028462904852	-0.144413676555941
AASS	0.129460424619452	0.692460375067309	1.05892594710123	0.272719767478959	1.39830066411947	1.06185428521375	0.0873799604119295	0.217919475018316	0.728234783013889	1.20292179400148	0.254690187098408	0.556205197479243	0.83298984800623	0.550405303596721	0.647518851989537	0.915518313506709	0.642682109782326	0.647856774367189	-0.393254554090213	-0.0185558540995896	-0.235498625505976	-0.516799474196317	-0.051191646663618	-0.249329384823457	-0.259257656595101	0.520159443907861	1.43772613910417	-0.762133243067317	1.09824689358284	0.0646365441945839	0.741199245695017	-0.250137995122407	-0.543891752308886	0.317043855243255	0.942769677695718	0.952610779580133	1.73553632304451	0.146202539330976	0.634947741704391	0.651780180380459	0.407318829517402	1.01084692318697	0.451971428675542	-0.0542931825882338	0.851400741454942	0.99672281390775	0.635584732646718	0.651393626414025	0.548188627719706
AATBC	-1.00093785552863	-0.79639342297872	-0.911964600543016	-0.98821614723601	-1.0324273935222	-0.861726548019468	-0.936402200867337	-0.75950101597741	-0.857123998539801	-0.728742759798859	-0.853498489621113	-1.10623195230242	-0.882947092761077	-0.610160104749639	-1.04251605387875	-0.563501639498995	-0.675865272928439	-0.739112012644005	-0.831244316431043	-0.89115143346769	-0.699701169738625	-0.807779215450656	-0.864598222489256	-0.769046817259381	-1.18703713239395	-1.15868574533274	-1.14210452980296	-0.500850505787726	-0.964000862328894	-0.87407296577554	-1.01771435905069	-1.02101306965228	-1.14518625571831	-1.12070428487759	-1.08797426774743	-1.14633297409959	-1.01570594026118	-0.791946063852947	-1.12740020563537	-1.13008804960716	-1.11886005741449	-0.878236314785344	0.0365127988340136	-0.519413165154736	-1.17640880984923	-1.06899528517819	-1.12867797725464	-1.11988829300204	-1.16654652033744
AATF	0.435067270591352	-0.0734638911154406	-0.0787295139488499	0.348968174971761	-0.510301972803748	0.0133843439628502	0.31904175907621	0.326370384022736	0.0980331003300094	0.083151040650881	0.350987095709212	-0.0636708519214754	0.304610268881474	0.268732437137933	-0.324343290295057	-0.180710762604463	0.129606852011596	0.225636989562185	-0.20387051829131	0.167237788074014	0.133189798663525	0.472388856873905	0.399210001636897	0.283144729244779	-0.218135461847391	-0.142064885114129	-0.319966155418978	0.729034983859192	0.197396117208676	0.728518611326701	0.454420939071402	0.240893834068976	-0.802399343293532	-0.276025018744532	-0.0803293907344186	0.0577218474220258	-0.0319954624351869	0.281537976256252	0.517070843584631	0.123788269519872	0.24411913087489	0.227617311439183	0.376613894305137	0.0338706574859218	0.074908405989842	0.0774658297204662	0.424015659445137	0.107184277269552	0.0814934271545237
AATK	-0.0214736984755495	-0.253769938594593	-0.0291306356554429	0.31500342550125	0.0100301191621417	0.589698512534819	0.196879933287335	-0.345794084192199	0.323235009892619	0.79305872500778	-0.14386070576459	-0.147915175513438	-0.776404751631364	0.529632553303993	-0.0395175989869802	-0.139574414965839	0.0520481309272202	0.350029843496402	-0.273879595093886	0.0687482360627913	-0.143042041443694	-0.0259713875046513	0.0380276606263179	-0.177702436600222	-0.343477375975425	0.471154051096968	0.117502034271364	0.126567923053074	0.574003657139373	0.625806899577731	0.220822394868138	-0.525158450074068	-0.797173382168382	0.297951862285584	0.71075391190899	0.597142565808743	-0.170357891792718	0.294546464832886	0.144690089370015	0.229844865754042	-0.154738544013605	0.898701311588737	0.41840649827462	0.594262654542942	0.697520051121841	0.404367918595931	0.713272280342121	0.505600148102015	0.179770200045777
ABAT	-0.674777486125478	-0.40159615518832	-0.375389645879772	-0.344537089804489	-0.289958194698705	-0.211578027741374	-0.452721565330516	-0.603398550993477	-0.3371483365316	-0.560356293524631	-0.380935283261355	-0.351607701355809	0.425402669753325	-0.775093421609674	0.368295298313182	0.0821425370012083	-0.602748783808462	-0.130633387361441	-0.278284381857201	-0.192941418506859	-0.0783228346305584	-0.465263870421219	-0.308044385514906	-0.266204274316619	-0.119345987002693	-0.0397714737589503	-0.249086441886058	-0.640456008505004	-0.535479803979641	-1.11100377448717	-0.589030029928166	-1.25442341241356	-0.139250856102839	-0.451547493291882	-0.388283191935625	-0.952556336046523	0.104579468797944	-0.519717105603562	-0.666127888897746	-0.823041561173741	-0.646770003055894	-1.2801491703792	-0.226223080672878	-0.125031557164552	-0.680221695922155	-0.549481139055119	-0.0943947035531957	-0.38424994117485	-0.718402405998019
ABCA1	0.619541620070841	0.844241539499001	0.431801377326143	0.38783558506774	0.541667576013398	0.0980331003300094	0.330424335376565	0.359973479255035	0.126415729468769	-0.0479614128861842	0.321526115863886	-0.729761909660549	0.4603401006886	0.210338253694952	0.0302364930722279	0.47406936469842	0.868239000392455	0.603486254705519	-0.0904955555573844	-0.17643713525393	-0.117971892085643	-0.269315040812072	0.256761645578606	-0.0495673160951714	-0.377277948347722	0.0276203074954926	0.451123513143996	-0.436767042932873	0.62463639174768	0.179433750999247	-0.0878334538957211	0.0931647323651942	0.0545783882019425	-0.585125260566199	0.434868060408146	-0.405224029068253	-0.0870198084765416	-0.128738177057414	-0.293120167172433	0.154293260539792	-0.250740737700264	-0.185881057706957	0.421796124003146	0.0790174348347235	-0.0694102159551399	0.00597358443687363	-0.318013358386913	-0.454515856863965	0.0524910932000019
ABCA10	-1.04007415697122	-1.05526354037416	-1.10664112617012	-1.22361743975273	-1.27044508725629	-1.04246522338994	-1.22711747913026	-1.00719413759292	-1.06629303020596	-1.10817027280934	-1.0889044518428	-1.29945358427229	-1.09106017252399	-0.98135348553861	-1.28801807419954	-1.20263819109933	-1.26453504232433	-1.12580767950893	-1.24382853203558	-1.06158320680665	-1.06496452042707	-1.05731139752826	-1.0329235104035	-1.08047473952359	-1.37521075336246	-1.3814577654565	-1.3819056891474	-1.04877004560876	-1.26906070827186	-1.13899328371488	-1.26866915970859	-1.27041756758557	-1.36205610340199	-1.35662989261095	-1.32243787089222	-1.35980066504652	-1.27081266241283	-1.05232418943624	-1.3737947051317	-1.34708304278435	-1.33491005411839	-1.11606117488935	-1.217627111239	-1.48419261494643	-1.39605180562512	-1.29182490489202	-1.32739719909111	-1.35452496373446	-1.37391691597249
ABCA11P	-1.53284607708141	-0.336712605659194	0.0650214838984471	-1.19180892621111	0.372753501693871	-0.214380606389165	-0.716282448393353	-1.25562732664452	0.0405275343413705	-0.689903095956938	-1.22959457886254	1.06185428521375	-0.655308867092956	-1.16866491358669	0.828793409093652	-0.212476903639833	-0.031176648634925	-0.705966367821954	0.331123091258549	-0.307138836906476	-0.351091841259911	-0.878024608991109	-0.511885273980253	-0.0892541528221671	1.20763207640182	0.449472107638692	0.0666393680151349	-1.22564054007592	-1.01479733911622	-2.06409834883591	-0.350116518625612	-0.463567799596927	0.327959276099559	1.24815586878239	-0.159365636208976	-0.56412022638711	0.512727669938885	-0.367555407126275	-0.316182903724372	-0.326382866814072	-0.409186487461587	-0.496827356237167	-1.65819161187215	0.147767876482858	-0.348275454706209	0.00394171493778237	0.0088653701572246	-0.03248903776006	-0.624759657390495
ABCA12	-0.925842260444843	-0.754761178380358	-0.872347637462753	-0.972454455259522	-0.903846922059937	-0.799295703915596	-0.867611600990393	-0.623117651782374	-0.822343941697155	-0.742555323658906	-0.735770585818882	-1.03859505208713	-0.843982844188866	-0.73727342012977	-1.0092892725774	-0.88987848438415	-0.928151902756133	-0.876027090379396	-0.972172491902624	-1.25866120882264	-1.25358734722355	-1.25187159277661	-1.24694647053925	-1.24610061935923	-1.06862844334044	-1.05299494828938	-1.00506965607676	-1.24694647053925	-0.93875042634797	-0.742234223732527	-0.975127931437937	-0.891213002725225	-1.02236813146343	-1.01524524281052	-0.98478349006221	-1.06344105233331	-0.952286844225162	-1.26534345603332	-1.03658897005188	-1.01935945206117	-1.04379453422081	-0.837311873334674	-0.612350856464834	-1.08269159488989	-1.06774491974109	-0.744777322442289	-1.02723980142926	-1.04080008814579	-1.05105445420731
ABCA13	-0.587881581000977	-0.450413095096355	-0.581835151750546	-0.576117799083107	-0.49255644523174	-0.516494382676643	-0.541755243237555	-0.327235175972372	-0.570241006041908	-0.403880982589145	-0.434087535072598	-0.76419329544926	-0.42479756074903	-0.429899336013589	-0.735645952814298	-0.410988455455838	-0.644538831591177	-0.585500068703474	-0.548552854269149	-1.04032466580032	-0.767044656603969	-1.02518250275199	-1.02430911266472	-1.03144551482154	-0.728772925416773	-0.582983950544264	-0.566816068410729	-1.00956678212156	-0.661507922336455	-0.41236396488767	-0.671801492691667	-0.528206059113545	-0.594563967288257	-0.592742641399167	-0.64325287206056	-0.696709167530307	-0.623968573790209	-1.06908254852541	-0.693596773455202	-0.670433656970148	-0.717024056149904	-0.582983950544264	-0.188674971552784	-0.618022656364315	-0.643866034871485	-0.567226143364624	-0.838739608633929	-0.691572285243441	-0.704925367504609
ABCA17P	-0.551455599112388	-0.204097121954864	-0.219061848506841	-0.420991840323564	0.61220464548132	-0.126214645532785	-0.153998205045687	-0.399187158094091	-0.347159099370668	-0.0329724206258271	0.00251711052822696	0.486464155926423	-0.49471585891141	-0.0806129728245079	-0.015203632612549	-0.229421323806227	-0.725209873900622	-0.379901267115504	0.682966828302133	0.898701311588737	0.259348936685905	0.925717723954924	0.62524445148032	0.269796906506149	-0.288229996099026	0.210745426688532	0.530697632149259	1.04364066859224	-0.0600005834816311	-0.0434246293751535	-0.0939513461636147	0.337209612799938	0.39725745402227	-0.0249303669915252	-0.208299745865996	-0.12122969772473	-0.159789183753137	0.640012774043915	0.650732678118416	-0.00343272096491289	0.396910870035387	0.198791169062214	-1.05457787056993	-0.668291344460927	0.132774108349516	-0.208648301048996	-0.0710268330232314	0.324046594925428	-0.0480316117410316
ABCA2	-0.185638272130138	-0.576865794417986	-0.0016531429999129	0.0414867304425731	-0.911248169706865	0.162033710235643	0.394070215003264	-0.0393184115044908	0.0288024984254722	0.10868264160758	-0.868288769489308	-0.876822479909951	-0.942692344535973	0.240740229176747	-0.506664422343434	-0.00483437708380306	-0.189775378361731	0.377987516292953	-0.544679282006089	-0.0152155788496354	-0.172605289987383	-0.197437895105303	-0.0510607401474388	-0.157525180554567	-0.846905686458969	0.237208159060419	-0.918004753354158	-0.194904767613036	0.222270963462831	0.381897870958164	0.0836632127400344	-1.06862844334044	-1.25601259634754	-0.387143774020525	-0.0170269177696521	0.0467963739962554	-0.367781936365607	-0.0287563313711174	0.300567067155859	-0.0169559817093751	-0.0404874320574059	0.41338260203655	0.378195130221799	0.522398620965471	0.158670889785643	-0.0687322355444196	0.472940266776473	0.0498903670499211	-0.0603799019017383
ABCA3	-0.109899974726709	-0.629795535072274	-0.405799822287587	-0.247105862717776	-0.227519867382112	-0.908220734194804	-0.205718007304798	-0.660111979748483	-0.63703724558793	-0.38888459395492	-0.628945338534173	0.237721848180908	0.110622505940038	-0.488647168200432	-0.117252450833769	-0.263973753140787	-0.0228626894737755	-0.583774091095315	-0.208285896566762	0.280006014814625	0.123261070422579	0.505600148102015	0.151271653987867	0.202779716583272	0.456461285641231	-0.125096404822051	-0.0893969543952193	0.292991441209046	-0.101218687447346	-0.424151419572449	-0.211565485555788	-0.230038158940644	-0.0620939771021212	0.515248746205664	-0.240657851659567	-0.179384188682906	-0.192466799550733	0.0282002813645043	-0.0678456238028502	0.0109936519238936	-0.174016212790904	-0.215685386589569	-0.937637202226429	-0.912336371327491	-0.24430353080927	0.380953897533572	0.184164456114288	-0.318099740076714	0.599420106936872
ABCA4	-1.0312394071466	-1.00764518726796	-1.04322734064034	-1.11700777727621	-1.15472689029604	-0.977785803466583	-1.0945273706371	-0.913653673814086	-1.01133684400705	-1.02662051850113	-1.02912827677668	-1.23610435405992	-1.01115039492669	-0.977658052189918	-1.22803379232469	-1.14175284731959	-1.06613401639249	-1.02786817269232	-1.18067036517278	-0.974619360601359	-0.954920913999972	-0.953953500693031	-0.535685047055483	-0.20433901977277	-1.31616701255383	-1.31917933204938	-1.26960937822235	-0.967681818845659	-1.12008709490134	-1.07254150088537	-1.21504237534896	-1.20248578717279	-1.35980066504652	-1.32302280904813	-1.25563185321828	-1.3442599061875	-1.21007401317003	-0.972614855433851	-1.28572484114887	-1.2671668647335	-1.29480312420535	-1.05114904511495	-1.0730640513907	-1.20267472442629	-1.33043815957075	0.933003399930508	-0.767665861033177	-1.28812115304302	-1.29885771921008
ABCA5	-1.05376621114566	-0.822173031127973	-0.426218909976888	-0.907268566105558	0.249422437570971	0.166355669272881	-1.11824390549151	-0.574622677948278	-0.279287949390677	0.169565011372418	-0.22064320759867	0.362765739374689	-1.23013827614284	-0.0734638911154406	-0.166091222086485	-1.08784982800815	-0.960290915817011	-0.644453856849686	-0.328845303067115	-0.142699156125506	-0.247876551421162	-0.305677651487091	-0.517606082079267	-0.2431385123374	-0.270393262560872	0.104410867212682	0.0996646471646608	-0.523534877522062	-0.412280441489202	-0.590474597220829	-0.814766849711095	-0.186299086446124	0.175645599893566	-0.114185814937822	0.121693850001394	-0.138082270352784	0.71075391190899	-0.178139349718851	-0.292955902681529	-0.637017495961165	-0.441292416164102	0.132852221710934	-0.943937105361379	-0.516153112250627	-0.121650872213523	-0.603156485091867	0.503292226512471	-0.162156066101347	-0.609394372750338
ABCA6	2.66951285801196	2.05987026403466	0.510077256149475	3.79402088815763	0.110502746434353	1.25445982053715	2.13967461835481	1.37788123229678	1.87859702833614	3.79402088815763	1.82517871719789	0.471334702899902	0.0133843439628502	3.07148504546395	1.56761611711273	1.38980243690115	2.28215501061569	2.57138629729761	-0.868288769489308	-0.284247352887086	-0.379657512682482	-0.823681282055454	-0.293599968457828	-0.100217946666135	-0.596434059427363	2.11577346782742	0.340302050631949	-0.28040788764188	1.13279137337943	-1.13788511366162	3.20292482368444	0.238956322654674	0.190503788199888	3.04471491241031	1.5101626166565	1.54720779346765	0.109446363854225	-1.09775384644907	3.41419522778416	0.779424575319798	0.675589458362201	1.94488640591654	3.32016501881406	0.836678344921723	1.53498469342619	1.12429461648204	2.25228851744829	1.29502151929684	0.611924411480948
ABCA7	-0.0234894064519156	-0.527197433434131	-0.766625012196009	-0.172625842636152	-0.61184333630899	-1.6098955492248	-0.0155087680178837	-0.607655947672728	-0.813036860722997	-0.690646161580996	-0.14662858225807	-0.562625133887758	0.0684691955826431	-0.127195510132162	-0.520860924105629	-1.91420460241402	-0.15652044509519	0.163404716093073	-0.240382065029936	0.200940993291237	0.372713577541027	0.499100068594059	0.0212838748353725	0.716579432068538	-0.113581005816789	-0.64591979391929	-0.436567363575902	0.990500766764484	0.0144743280558953	-0.331701373986234	-0.369901787268765	-0.65977885677201	0.21703241071508	-0.046435549504463	-0.423080221802622	-0.575741929798977	-0.267081860819972	0.363748256719609	-0.553358301647126	-0.60035554042382	-0.485292987315905	-0.542784045952883	1.65199152635609	2.07419016697505	-0.803193856236925	-0.300073941939902	-0.40853908098083	0.288105912642283	0.173512273295293
ABCA8	0.0789287555510992	0.0319287245772253	0.141858467601322	0.417656982041918	-0.371961853509241	0.539000923444027	0.66578489922643	-0.281045399047339	0.501701778566633	-0.213594258821947	0.414502344569973	-0.827387989686763	-1.58383768906849	0.956542594999691	-0.407883270596674	-0.0101402470806235	-0.13351675577379	0.436745528171138	-0.884386733987492	-0.558441932651002	-0.0145638483711992	-0.472461435378104	-0.351023261947399	-0.559086033911484	-0.468955819266279	0.558539294400499	-0.230332900930284	-0.138148406273985	0.598378939991631	1.39551798374809	0.517070843584631	-1.68534955539018	-1.20343923944119	-0.359785426391129	0.826267299863906	0.834209176179891	-0.278463223905776	-0.252830065553862	0.858988881516635	0.011136963711773	-0.440120765139751	0.966385109474476	0.161003384006899	-0.167736311266119	0.722354526767889	0.311746822242155	0.881406007738219	0.62113564115279	0.416172148096826
ABCA9	-0.129229355845067	0.19330624135599	-0.262395200849459	-0.0278162515344072	-0.0496707343871228	-0.311888230543953	-0.191953958463082	0.119727577392533	-0.186755152227634	0.644502288672717	0.416153813292562	-0.364686172050407	-0.268393400254333	0.723330188509149	-0.267752450503782	-0.108746905129868	0.0491741211884881	-0.0778796739613047	-0.541392622853128	-0.828360696051481	-0.707691742812766	-0.83991867089815	-0.776557694561034	-0.789014412387183	-0.407332041684627	0.227617311439183	-0.0368843652478977	-0.833541704513741	-0.619268352068219	-0.344356978777817	0.0948919226785008	-0.234992322655495	-0.279990538865243	-0.0117827273562888	-0.0731788632998189	-1.01667931049623	-0.353690709751142	-0.565041374953653	0.0731786889907385	-0.494246703861719	-0.490935178633869	-0.263002847213597	0.484182745973611	-0.0277184358634665	-0.167393280593504	-0.128976374847828	0.101018793896722	-0.443550982543703	-0.569765376119459
ABCB1	0.0186089493093856	0.560812809502752	0.664809179280821	-0.0129751440569962	-0.293535923648973	-0.140762514557461	-0.145274242627083	0.448680978350625	-0.196749444761182	-0.373707184568537	1.32262590884137	-0.193118006792183	0.799516273069771	0.314158650354678	-0.303582646980246	0.744657892373556	0.260429701560442	0.816905643158663	-0.528111909742231	-0.203957228925144	0.622879210904128	0.198408692242628	0.191889481366886	0.397064956204436	0.641173509113928	0.82442220969186	-0.0890552557860936	-0.0780637513624778	0.355256227819041	0.535349481228567	0.263023342349093	-1.0436401097651	0.138200545131522	-0.56472465367696	0.598866956731877	-0.713762494351016	0.596841230065897	0.543515587791671	1.20061571209837	0.502363701690106	-0.494966575550355	0.139879667129508	0.471154051096968	-0.216083060812447	-0.299630608625333	0.91371051349867	0.133552963869389	-0.2262959955502	1.13196074189347
ABCB10	-0.646756476691414	0.483713422123321	0.31482312731522	-0.108621104902965	-0.16795646425745	0.107168381436473	-0.0223663959422676	-1.2440877647317	0.282751417711904	-0.264304817846101	0.0721958880795206	1.21263085143094	-0.429317982238016	0.47765298949423	-0.299347661842021	-0.584548778126586	-0.436857425374084	-0.277939060849484	-0.162526540785242	0.155301769121182	0.300821945932208	-0.021338366175612	0.104736374429678	0.337061569194706	0.285391687456761	0.171655516319862	-0.167736311266119	-0.390623203414379	0.282420241480753	-0.109255638759242	0.0705033510950032	-0.269385346008526	-0.154228968633585	-0.421381336222724	0.280645082157994	0.378512107914423	0.329910508819619	0.254981574117612	0.0311038691745021	-1.21956832049189	-0.149037480766309	0.690809674028122	-0.865008172455481	-0.635173339453548	-0.20433901977277	-0.474583903737885	0.613894339632915	0.170725488297739	0.0969161592635486
ABCB11	-1.13015514061002	-0.974112002526349	-1.06401294006453	-1.1608152924805	-1.17533055347088	-1.01039708963584	-1.07822466267025	-0.837807181366511	-0.998039477356665	-0.999540703253322	-0.9686337038456	-1.2021513870227	-0.732465535910884	-0.948864305125378	-1.19622327407619	-1.10991687776969	-1.09558409253843	-0.894799501995027	-1.16477803278966	-1.41702056294565	-1.41702056294565	-1.41775064405516	-1.39921523662671	-1.42145622440814	-1.28062441087379	-1.28453419159654	-1.2896738749733	-1.41633487558908	-1.13645233464272	-1.02200861652614	-1.18814622613291	-1.15186719193233	-1.30097075651481	-1.25965645333343	-1.21521825206846	-1.27081266241283	-1.17229246508369	-1.42210998960319	-1.25758149258288	-1.24543295041646	-1.25688192573848	-1.03737845420452	-0.914487658939929	-1.23738900843089	-1.29398851512409	-1.1791715414491	-1.185762434175	-1.25758149258288	-1.26293728978692
ABCB4	-1.47195793029785	-1.1557844443814	-1.3434883421442	-1.46863646906285	-1.49392974089365	-1.2624948382941	-1.38988409742049	-1.18728599724615	-1.31151315467728	-1.35853055778051	-1.31499813968383	-1.5749600758109	-1.26224303040181	-1.2543484861655	-1.56031015227354	-1.44689649928595	-1.43925517862651	-1.03682226248362	-1.52025422860224	-1.57640634944808	-1.50602697768137	-1.57898224091719	-1.45332198410299	-1.58378941718833	-1.60153066807736	-1.62150543213124	-1.5834724369222	-1.50919692974671	-1.46814362029032	-1.35941703065656	-1.51636871443349	-1.4817617104811	-1.60812140626535	-1.57968205543934	-1.54434108043191	-1.6132316061079	-1.51193743386905	-1.57287323841335	-1.57449257545348	-1.54810209482311	-1.5675353143671	-1.35227860926142	-0.969296441717039	-1.29008688906771	-1.60851603973719	-1.14290205350248	-1.47367642260707	-1.58308157772963	-1.58105258167439
ABCB5	-1.1572119919258	-1.01039708963584	-1.1068612101975	-1.19273837115159	-1.13458865239377	-1.01688478394772	-1.14257863891553	-0.913262829306639	-1.06572975686203	-1.0433656977475	-1.05307871628982	-1.29319080087807	-1.06049127362341	-1.00624880848898	-1.2576117913029	-1.1362767072433	-1.17302495720148	-1.09587521024393	-1.24230075295788	-1.40316498295571	-1.37137891120726	-1.4069247261185	-1.38887540315266	-1.41292112334952	-1.33703885823822	-1.32739719909111	-1.24806276742398	-1.39780665220616	-1.19076342122383	-1.08632734005098	-1.25303188107476	-1.22305407586638	-1.26181706845963	-1.31196373813656	-1.29236366207052	-1.33430914158346	-1.25848819566371	-1.43331338687641	-1.32066372292034	-1.30232207123869	-1.29787254132631	-1.13201796131567	-1.08745180254734	-1.46192722461206	-1.33469302644595	-1.24642581478213	-1.27922587372161	-1.32101278901939	-1.328311946251
ABCB6	-0.132333870335856	-0.17122625277085	-0.129612703928166	-0.0579102234343433	0.205194862355341	-0.274115353487261	0.0670774286983845	0.130233180293241	-0.290637868163263	-0.227519867382112	0.0101039713927362	0.257573334664687	0.0627387589457478	-0.0120000727970385	-0.0395685997367571	-0.143305314701	-0.0920788685104434	-0.0853175241703223	-0.135342091425945	-0.328743990145378	-0.224222122956004	-0.0933739952543617	-0.367719980861219	-0.0231341542447792	0.181921547345227	-0.216831142070625	0.177601375914575	-0.13595182196602	0.216379610565015	0.1810008715614	-0.0179208027064611	-0.132488169529891	0.128446588058666	0.283960110029403	-0.0499136684026715	-0.124971459485397	-0.196919874149428	-0.340791531776632	0.0661556928131951	0.34935799693335	0.0123800298283719	-0.0540190807218461	-0.0562584222905868	0.0253534886221329	-0.180663976829795	0.0767446537848867	-0.260502120495279	0.168841522223589	0.268996068209738
ABCB7	0.181548037492819	0.66889294275274	-0.0551405104120423	-0.0102101037469973	0.384183293848091	0.259597479810258	0.36244631487798	0.893389419674128	0.275307946443945	0.546368148711398	-0.277730302844013	0.514885748811478	0.493025866561073	0.286472226090619	-0.310744819007453	0.0531340285459748	0.175308905194271	0.0152469218161151	-0.394830111220069	-0.0899272113540389	-0.165041750237793	0.0643205816573092	0.0553400305634862	0.0653976918883755	-0.189177047136243	0.243530958352494	0.589522582279805	0.0089894244669259	0.0628060773090044	0.443859896296504	0.427937672928052	-0.475012836244657	-0.751028898208568	-0.886825211245964	0.318196937880442	0.473903060902755	0.482866327236383	0.177547795565995	-0.362417016722442	0.284969852694993	0.463925942208503	0.332305843185176	0.640651571893012	0.180005199098732	-0.414274607841639	-0.0190747307358374	0.150007935889115	0.0958077435298942	-0.158900581647662
ABCB8	-0.281427890007627	-0.843251895169593	-0.0979773616307204	-0.102520458074933	-0.220181287938347	-0.295123550751399	0.0211788333894336	-0.761561577100334	-0.397341998349726	-0.53939257015012	-0.853269232726535	-0.319808849471596	0.187622760922164	-0.185578911575477	-0.165442512142558	-0.46621765383865	-0.19211074723862	-0.0338583273355166	-0.23325723263441	0.109168212111457	0.365563658657199	0.270753553548447	0.384280730161345	0.270033414194879	-0.146399271236432	-0.490735011383513	-0.24023882826887	0.34713047083327	-0.096309552484569	-0.190801629799528	-0.339891171541405	-0.337194921029677	-0.0998758730988881	-0.287306201684454	-0.524773986443366	-0.281871012764301	-0.511401469457606	0.213403424403334	-0.149805813683973	-0.585321491014792	-0.430718944847006	-0.0893287997989531	0.136874660061424	0.215166934840847	-0.139367004410803	0.00101773069717084	-0.0315598662828475	0.0276992961253741	-0.144741949086351
ABCB9	-0.783325334644221	-0.761353413769975	0.0136574321679263	-0.742804986287121	-0.0941304212439074	-0.899230899866981	-0.677669521658294	-0.337670692601156	-0.418776590283474	-0.0743978809968759	-0.964410693756713	0.0705306756894808	0.169126177748649	-0.874138502500347	-0.163968390076532	-0.21284344910486	-0.624982274213187	-0.276955268708055	-0.546629477069684	-0.186237875361179	-0.337943586061715	-0.426166743606098	-0.483700975380591	-0.27973708416796	0.0825938271818506	-0.599935046144857	-0.21356257305747	-0.517201058214841	-0.670819309323917	-1.08699082982661	-0.830898251036311	-0.481810818382674	-0.184013085862633	0.190503788199888	-0.673279941407174	-0.786888520682493	-0.747269158237143	-0.222946294195573	-0.585125260566199	-0.509200209170389	-0.881991679142256	-0.858911471363341	0.365709984504939	0.348336566242925	-0.491219828889156	-0.121650872213523	-0.590898032875277	-0.548355157724527	-0.574932464148478
ABCC1	0.0661034619862464	-0.158656509263387	-0.238132458808565	-0.631374240638615	-0.362842046554434	0.143919074219374	-0.0675491436553332	0.271958004525163	-0.149604177427909	0.10339468646252	-0.323036707385497	-0.0589654407365467	-0.819972049076355	-0.12551216048208	0.320247452547308	-0.315448644669344	0.0375124533129622	-0.912356609120993	-0.0872882649246324	-0.0583782456051773	-0.046570574890579	-0.244052601854654	-0.0214882218444871	0.0369792729384738	-0.144741949086351	0.076428313318971	-0.284746090485062	0.0768891572325963	-0.388731573938765	-0.413386055319348	0.001187806994183	0.433165438105947	0.0281345675194366	0.111232997527021	-0.135152284983063	-0.804011578790627	0.171892206488964	-0.0459735103764585	0.336344556697068	-0.0581096166523861	-0.601604166855466	-0.430454980302506	-1.24593749474302	-0.5011366749798	-0.970510595377208	-0.0273594169965982	-0.326311540872687	-0.285788198710627	0.172936900206491
ABCC10	-0.0539736190484821	0.0652043251667625	-0.0529907486649536	0.266214733300394	0.0657108477942571	-0.415074087344643	0.0864925229231891	-0.98343569996652	-0.0685185655246455	-0.28215129581116	0.218541300045812	-0.201458979853484	-0.482606047321698	0.179453387998351	-0.508871339710318	-0.621315731897442	0.122195469556036	-0.206776954708535	0.219562550018095	-0.172387237853208	0.463925942208503	0.192491768312382	-0.152641053965737	0.34162589592562	-0.0438846638052314	0.196228157506809	0.219894383088526	0.510843923282385	0.668871362610985	0.147843469171574	-0.0049790095779322	-0.570462634330898	0.377481521354632	2.035808580628	0.00812810257792326	-0.309722107633608	-0.345248901849921	0.265080579867925	0.225824927086988	-0.2971219726983	-0.55347510505769	0.0665565778394756	0.256434906079972	0.844456052430241	-0.265141154200465	0.254374199165024	-0.094238135131575	-0.443993820375316	0.0443073351146062
ABCC11	-1.32510693041126	-1.16555033548273	-1.33458784530691	-1.37343648870174	-1.51356897993456	-0.974361938115552	-1.54503390262654	-1.25232706161801	-1.24718054947516	-1.36490628348864	-1.3168900476117	-1.56274353820088	-0.869749695492552	-1.23610435405992	-1.72673238812131	-1.15528595656986	-1.39208865388258	-1.18051973635274	-1.48359358051528	-1.12055581460814	-1.10517604996913	-1.15205991923777	-0.97148741867939	-0.980047561230346	-1.41681638211146	-1.27682995897161	-1.59968738581873	-1.12448365498722	-0.884825555640462	-1.0465769915414	-1.57869612832432	-1.47258723834633	-1.40164690724924	-1.56179037146907	-1.63272591250646	-1.61684129255576	-1.21956832049189	-1.0937822359304	-1.59383709986709	-1.32389261353231	-1.60332110549868	-1.36934504997413	-0.84351925810343	-0.829579148840491	-1.73834575914254	-1.44823307547598	-1.49923201426028	-1.54810209482311	-1.53420201381968
ABCC12	-1.2581645162732	-1.29124139295651	-1.39477347683233	-1.47245136510239	-0.964543404217989	-1.32316269693183	-1.3490202767736	-1.17087057597822	-1.28639052124511	-1.40369106614394	-1.35418412602456	-1.18551022617853	-1.38897814793889	-1.26894369232205	-0.355502301129214	-1.40255493060247	-1.44472923656615	-1.39901629438902	0.211679679027296	-0.819768641632029	-1.01325626739625	-1.17373488712024	-0.780578492546812	-1.19280849203634	1.13279137337943	-1.62733136867193	-1.07270761627714	-0.620831623692859	-1.51193743386905	-1.37406466318004	-1.46789815405642	-0.980981981192295	-0.743786967400733	-1.329476223083	-1.629207343017	-0.288427266269151	-1.52199426331575	-0.889004222421357	-1.54774216513325	-1.57474772760909	-1.52773848496497	-1.13678158283496	-1.21641863287098	-1.22564054007592	-0.196221946292355	-1.52014197013408	-1.54373321230802	-0.432960833688511	-1.6416231494388
ABCC13	-1.04860967371654	-0.824128248050938	-0.880760138353829	-1.05678108334082	-0.974747595037183	-0.906047559589901	-0.869985469085409	-0.653489524615203	-0.843053610595087	-0.809991882107325	-0.710902438467798	-1.08003939716053	-0.796650171195236	-0.809889091906966	-1.04808237372589	-0.953362338175653	-1.00267039755474	-0.945226346622891	-1.02068717481823	-1.34725460036503	-1.33275689761075	-1.34373372444764	-1.34285967493463	-1.34285967493463	-1.13518462426288	-1.10237142648341	-1.08210608746409	-1.2834393664612	-1.05603768347839	-0.827690251581073	-1.00935355790402	-0.972435062878641	-1.06890802183098	-0.943937105361379	-1.1049698951723	-1.00935355790402	-0.998402112144527	-1.34242374924411	-1.09071555574441	-1.08382673334417	-1.09651952237867	-0.867499064417281	-0.843798645621161	-1.23661901606002	-1.14274237446858	-1.01771435905069	-0.954650362693564	-1.01461732430521	-1.11389757915934
ABCC2	-1.10418590576705	-0.749107700534242	-0.639436676917672	-1.08362582908534	-1.04139722325356	-0.980295719099452	-0.963475734870822	-0.78646483165026	-0.89793126901684	-0.899488574787405	-0.129612703928166	-1.12855843717014	-0.978350980030453	-0.843425927447474	-1.12812071524003	-1.02385307869607	-0.69925539363166	-0.888277526696796	-1.08397320752833	-1.14921420400689	-1.13972643614834	-1.06364611315789	-1.13316711563245	-1.15920144901858	-1.19204654181942	-1.27567388297798	-1.15205991923777	-1.1425462500066	-0.758425626626956	0.272974514010385	-1.12720470724468	-1.04557168200326	-1.21696957165101	-1.18814622613291	-1.11998432142272	-1.16654652033744	-1.03401914409744	-1.07547012184514	-1.1468098630584	-1.15220414304133	-1.17469226398464	-0.927399946867202	-0.494463422099467	-0.959377892860129	-1.18226563207671	-1.07696913139636	-1.16928506579443	-1.1721007013959	-1.16814026446804
ABCC3	-0.295425318001625	0.357900198712673	-0.434771336626805	-0.367979129194664	-0.361132949749612	-0.276632963438651	-0.17333790642421	-0.0581470441747111	-0.341091271931905	-0.0467749797628642	-0.254244203047466	-0.505235114507976	-0.1797257493858	-0.306133206866563	-0.456480064471985	-0.108568723103593	-0.238196021540186	-0.213366659063301	-0.412788845102695	-0.356201301453998	-0.270497230368219	-0.266137298917936	-0.281211322154113	-0.0308555601986885	-0.476336486209568	-0.381580088970214	-0.382079557746734	-0.272020012073344	-0.314427491781394	-0.0991873246819131	-0.499869138331718	-0.331452304968741	-0.445505146390641	-0.253955408743161	-0.370406306947672	-0.417014469770984	-0.3380220845166	-0.266062013422717	-0.428716321705784	-0.451641063862533	-0.465451761214973	-0.24519092476564	-0.0600005834816311	-0.476062624064742	-0.426001385309101	-0.356108690057587	-0.415483986021742	-0.428988383877959	-0.481549890120164
ABCC4	-0.205994895831959	1.2205542633227	0.88415187885458	0.980875227197696	0.301114597857309	0.660725422604023	0.615484816051863	0.0596486857937702	0.593872923089537	0.683769917812017	0.618294347564099	0.912558712163711	-0.229468071466614	0.0806037526545071	0.427742017353291	1.5815638187431	0.90700271842192	-0.184856364979186	1.05892594710123	-0.161123824956816	0.262769571022029	-0.29117917553115	-0.277713254687019	-0.195711104254192	-0.60708462056955	0.981426334463309	0.318595342411954	-0.366165855474277	0.371263172566507	-0.487321759093393	0.961846119025087	0.155101105808232	0.682188748014132	-0.752911363879325	0.433456134465304	-0.468171130380504	0.35271504540745	-0.306305282944168	0.618525249061758	0.907619477583859	1.1005051584993	-0.0270574924404149	-0.793386534553962	0.136293015995529	-0.422098681643192	-0.0446498190115079	-0.118374530844188	0.324849382713469	0.59081299205101
ABCC5	-0.156277873137514	-0.269205714361306	-0.784001286576797	-0.237905279820583	-0.434397093680252	-0.428417864131191	-0.448401603376594	-0.598560737704791	-0.439852979507695	-0.257633318309451	-0.0155691112620272	-0.178123408492573	-0.899418095185001	0.0523566942340635	-0.543257516923386	-0.616453160278793	-0.216229014027418	-0.576510806189753	-0.55938797231487	-0.497801532272628	-0.399169008515141	-0.357872866455331	-0.305176341235489	-0.17383205919004	-0.340641628961005	-0.430718944847006	-0.398914982428235	-0.123710562946448	-0.232496877029526	0.142500297558337	-0.46387350432534	-0.243527186379654	-0.463211826465924	-0.0842288883623597	-0.322290669982587	-0.26292177343034	-0.703448836081874	-0.392335130898446	-0.0790718114310951	-0.508936699841607	-0.526304141492168	-0.25151799917834	-0.13387853872226	-0.0431593313119921	-0.53911244653334	-0.462851110450362	-0.411879702997713	-0.612716498858518	0.0586951601393134
ABCC6P1	-0.808701038054378	-0.68693638422798	-0.765357061728995	-0.854087974319637	-0.824877170767878	-0.778965197118715	-0.785507465151184	-0.543889751352773	-0.758895907597663	-0.70392139581316	-0.658303739842412	-0.983485761232092	0.105797538623354	-0.676291088319427	-0.9415785310046	-0.836332940815822	-0.886539395692974	-0.797762331150637	-0.932742545768382	-1.15908615146689	-1.13201796131567	-1.13940047813018	-1.16098499495087	-1.13422506427341	-1.0031119387044	-1.00294715965696	-0.921559980890509	-1.14859204466921	-0.789069180452492	-0.702240009540629	-0.941300727870515	-0.811909579329336	-0.994736887305249	-0.858079080709016	-0.934884881750363	-0.995127057244628	-0.913908132957766	-1.12878286347522	-0.971802732013079	-0.941300727870515	-0.995204510822725	-0.745399421418439	-0.489905802531209	-0.859596743536612	-1.01951894634841	-0.859316217043279	-0.967194203112379	-0.978829873677817	-0.888422836109146
ABCC8	-1.30409566085855	-0.55699100548723	-0.505053028547726	-0.63703724558793	0.127441602692659	-1.53639531705215	-1.04669425069938	-0.804175129028447	-0.572790888456168	-0.207031547301783	-0.878291328085852	0.114530920229392	-0.137589292905979	-0.994259115109105	-0.623031597294529	-0.575577838394723	-0.505793352206571	-0.229685467613131	-0.644874381223554	-0.585029717083483	-0.595226025125891	-0.603589081196002	-0.688877500964706	-0.451547493291882	-0.193008826683023	-0.220969046532709	0.128275228913531	-0.543511259008467	-0.261352781437784	-0.488162800008331	-0.488882325025337	-0.504678960469645	-0.687886054315392	0.233578111835656	-0.290618748840724	-0.282524667856088	-0.190371587605252	-0.564373744278989	-0.351804430395799	-0.256775739845344	-0.384931577525485	-0.654093790248233	-0.72325742320655	-0.162303771969448	-0.445247133032378	-0.312638459747379	-0.778742370220389	-0.325858125390104	-0.239942900090456
ABCC9	-0.58976113856771	-0.226275088472643	0.215166612178612	-0.826834402865379	-0.926228896118244	0.317167738639089	-0.616453160278793	0.106154561408107	0.303899237139971	-0.467698642236865	-0.487806586329861	-0.155767549757954	-0.101429320619879	-0.334933135878723	-0.75689829966833	-0.023823417217671	-0.394658756716456	-0.634224263110534	-0.719395111121319	-0.393207132305288	-0.561358356798584	-0.557502811812117	-0.443914837477148	-0.99733791111409	-0.944705998728141	-0.7494513094997	-0.953024930363368	-1.01194634121106	-0.608174466058849	-0.897198879096438	-0.123040246964135	0.210433323472512	-0.91026713132869	-1.18759520967255	-0.447313142861313	-0.854336921272355	-0.270497230368219	-0.521031094781724	-0.976874798245614	0.0330307734724517	0.305193046113298	-0.583827574992218	-0.283127691839341	-0.557417526882865	-0.78016540386636	-0.452545008822445	-0.936253106674735	-0.870221467513126	-0.769046817259381
ABCD1	0.981337125371528	0.17007897543318	0.445320435832793	0.47765298949423	-0.482016547438159	-0.303669461635444	0.450512272521206	-0.0907348979266845	-0.360709946344777	0.165686472011918	0.111910255293458	0.767724439782291	0.825066355691986	0.0287366047415559	-0.128979692893412	0.723876960698494	0.300115691233789	0.634425334153533	0.418389242350588	0.0725677269151087	0.415069209591241	0.0918406349467697	0.256434906079972	0.385095840409561	0.0675882317570091	-0.0201781361248129	-0.474655144009861	0.193466965155662	0.371531193328479	-0.00231873949866571	0.0982966658299178	0.468566127358523	0.191315485085662	0.329095308567954	0.347671186910749	-0.446004282706397	-0.335122784229372	-0.0240261226612425	0.104068342127532	0.517336038626165	0.410853903817077	-0.0311505875756675	0.828972375765866	0.199434540608269	-0.158900581647662	0.923232913875089	-0.0669500509095999	-0.0712133621600645	0.141788499379735
ABCD2	-0.84060067036864	-0.711911547215693	0.291024750330326	-0.839812459985004	-0.0973261283108974	-0.406151613828943	-0.749107700534242	-0.621610736652243	-0.212305409609189	-0.432002877035355	-0.690845448634216	0.699774289716577	1.53791718245987	-0.684751536577299	-0.293977165645797	0.424302917513405	-0.653829037539336	0.895002538933396	-0.766039226102701	-1.02582962170446	-1.1632354986345	-1.27386587395685	-1.28468149837001	-1.21885849184822	0.396657671940445	-0.916514920180332	-0.407805839919692	-1.43563470521208	-0.744082427191159	-0.895303585650174	-1.01178114208477	-0.801334815733626	0.705364590149519	1.42624500794083	-0.741914905664901	-0.824354791679976	0.787575583976233	-1.14959446946708	0.285391687456761	-0.809459191252886	-0.306305282944168	-1.16953108135845	-0.942503823025127	-0.65851023234541	-0.844056769429711	-0.708806139068964	-0.0386970807312386	-0.0257516593752104	-0.962959555450603
ABCD3	-0.353968740674476	0.378849138731524	0.555814648119947	0.0217434115613949	-0.463969814974627	0.404845626789026	-0.167256836863405	-1.05476901638525	0.624301592804967	-0.446724931714096	-0.170585306780595	-0.403880982589145	0.344038325599274	-0.237167808530757	0.0101898850414963	0.250437059742175	0.163256780503817	0.0396053419270977	-0.292203160168235	-0.688598484453258	-0.542596320954424	-1.35190361523799	-0.879780475410101	-1.2363877355438	-0.376092104570766	0.502753130755624	-0.432405149283045	-1.41551099881247	0.207405038134334	-0.220897513860602	0.281193447466376	-0.418518200305458	0.0418636168175877	-0.210094535850019	0.511778985579136	0.156126283904654	0.689587968439193	-0.998556827770761	0.244445466951448	-0.0117264406896413	-0.025357017036002	0.525784200262462	-1.1577320999256	-0.705954116132388	0.136874660061424	-0.00627901274954708	0.558250708315171	0.684108716947288	-0.515212222044929
ABCD4	0.144041900652748	0.00966356658177418	0.0711214925327809	0.548120297891565	-0.0862209617842901	0.194031707848626	-0.186124932753643	0.174168327223969	0.0529817579678939	0.2580975403624	0.126884887196459	-0.0432134667837037	-0.0992038344734359	0.0917901542974463	-0.408319994626361	-0.283316002052842	-0.0532627398996312	0.0874637228411909	-0.205417795528107	-0.4732972032289	-0.511100807935454	-0.392254343316503	-0.595736515455953	-0.350619713623069	-0.650956998109361	0.138112966978153	-0.000220588139090338	-0.479274292187329	0.08741783462086	0.370626834885022	0.244337798604373	-0.339733141564029	-0.292955902681529	-0.319516416025357	0.0529434702538161	0.25631447531474	0.284645928673128	-0.475181939648294	-0.270659213410386	-0.0702457252016886	-0.242941705370972	0.116773507882336	-0.265059463074675	-0.64901597773096	-0.163473039838686	-0.135286217778266	0.0423505959315045	-0.0344539293290073	0.0899978219276086
ABCE1	-0.25093967268678	-0.332461773010027	-0.154368808156431	-0.430677595622905	-0.398945103106819	-0.0152715486013117	-0.532116253762624	-0.529751326540672	-0.0453943206146758	-0.69607137406386	-0.589488479083837	-0.2980700051515	-0.479429220622296	-0.48469692264158	0.184631614277799	-0.475367037257114	-0.129824839707806	-0.475093031182612	0.316697375510166	0.00153867734799047	0.0287898401683185	-0.120773043755985	0.0688295814439397	-0.207744828846651	0.340780369630218	0.281660737476055	-0.40478307476252	-0.216478007221546	0.0590128469677896	-0.410503151997447	0.107098769414676	0.310637998013089	0.14148608058414	-0.201762566244055	0.0668937244693425	0.170513653536791	0.505166711804557	-0.119508619808118	0.264623879121768	0.103246799221669	0.183110431716189	0.317971844379748	-1.57844038806334	-0.413579069940718	-0.0772123801064444	-0.072556854752921	0.38127141245696	0.386553464082579	0.0996646471646608
ABCF1	-0.0192778456223849	-0.0575063047802543	0.163767560462912	-0.143243295258005	-0.142205379951509	-0.0522233656367783	-0.301228968682738	-0.267752450503782	-0.139912942066447	-0.427910792228739	-0.302901322773219	-0.0787958164969669	-0.0711559856521762	0.0960264116538677	0.0639569175130542	-0.201522699272874	0.0300848822606582	-0.116934973119133	-0.0595397082375176	0.217622847738138	0.00993464542444344	0.210745426688532	0.436300241303541	0.0756794256427727	-0.318468322152795	-0.187461658155763	-0.201899053868184	0.333082977083665	-0.0206926959518521	-0.137882170389537	-0.0136196665361925	0.408367869073444	-0.0202637281562124	-0.486263985182825	-0.282972511499998	0.0925810846360275	-0.0708339068118068	0.26911463441036	0.0684682428447582	0.0402078321262016	-0.0783937235887928	0.190598752645156	-0.737317812201237	-0.336794861526221	-0.0803983430490439	-0.314795117997921	0.361530842735892	0.129364997804305	-0.314740993096315
ABCF2	-0.166008452645961	-0.338267125355021	-0.222433183180723	-0.297566135241365	-0.507482930911795	-0.605892054892188	-0.370273315855881	-0.494166085495222	-0.410406709391252	-0.866449261796224	-0.445932183754883	-0.262395200849459	-0.485622620775193	-0.182598049026366	-0.51552748804175	-0.671379114844544	-0.539153172391349	-0.28480766521886	-0.144342236187329	-0.136311716602639	-0.311199538729125	-0.0984557099376583	0.130335047285768	-0.24619180231149	-0.125949630655619	-0.474496553645072	-0.484066487638044	0.119188471590312	-0.473640151529309	-0.252389982515171	-0.251355115420343	-0.0443394445879454	-0.296933558215873	-0.780953378080574	-0.422914378087364	-0.416511861977194	-0.334362983404017	-0.236076885190361	-0.30000327534934	-0.53270020101531	-0.413126839169586	-0.209952253307029	-0.292122165650657	-0.254557871113223	-0.480320356269352	-0.946544123237625	-0.307657508343237	-0.379657512682482	-0.401281246020961
ABCF3	-0.576444763776065	-0.561707621317632	-0.279976251018531	-0.536099484659256	-0.379156759908933	-0.621502319498396	-0.67150474311321	-1.07642285496683	-0.302373577459424	-0.656813850016363	-1.06049127362341	-0.253600450678126	-0.439940925283271	-0.474690304466375	0.273610784758596	-0.597821811707601	-0.30916465900162	-0.286727174508333	-0.124543736680424	0.525399191676397	0.237883571236622	0.369756258631593	0.613633145585653	0.0900671824151137	0.142073344158854	-0.452545008822445	-0.355367333103973	0.568604404971535	-0.290473575370043	-0.120773043755985	-0.218817886417145	0.141704557300607	0.0969161592635486	-0.582371109636496	-0.498159812469336	0.56058225661348	-0.228334879619568	0.252343616653306	-0.322005765926523	-0.269454138762835	-0.125298274342927	0.060264590527844	-0.637136505140472	-0.750094521050042	-0.0421860851975574	-0.581452601679964	0.524065015971398	0.191790324000306	-0.138357741811021
ABCG1	0.0824894240728248	-0.0224911516611056	0.0781202869181846	0.223336067763669	0.220380260164467	0.298821533502712	0.358244286430542	-0.0365350130459192	-0.0395685997367571	0.325300605943253	0.748172652075614	-0.421411628175061	0.227853768793314	0.46329124429211	-0.253153944382706	0.228722953749376	0.52298159601791	0.661717053717163	-0.975234947781149	-0.00343272096491289	-0.0019060017351165	-0.134932610011396	0.234295216505555	-0.129872359589843	-0.186151040996821	0.150342054356202	0.305322088038429	0.193652298463114	0.907619477583859	1.43586715426523	-0.0900003308425966	-0.881874955657072	0.961112647877214	0.254720944618657	1.12539299226047	0.700754846703605	-0.129812386160325	0.374918782768722	1.23180150755317	-0.24240923271235	-0.706328992419382	0.618771027950265	0.161428497712548	0.849550462888446	0.760370550146979	0.149533706366935	1.15899850066645	0.372196066791275	0.0177154946141618
ABCG2	-0.458175522687555	0.83298984800623	1.09979488445971	-0.282467025043945	-0.784348929388788	-1.18189346305767	-0.352529073312844	0.140336863239121	0.267636176501336	-1.7966345568606	0.87095928036271	-0.446824651914567	0.130524030712636	-0.00946630041301588	-0.80230011603438	0.783050555138739	-1.08101999997637	1.38980243690115	-1.47936602139795	-1.8345908086443	-0.432699832811276	-0.69301533411244	-1.12008709490134	-0.445505146390641	0.709558949104958	-0.114476029420755	-0.819097872687348	-0.524481373618233	0.989019606738544	0.345231095105402	0.528637003940886	-2.23570195241308	-0.902635208064738	-1.45189810262558	-0.105827694855667	-3.06711799952811	0.538762721739658	0.121225878389001	1.16542597945958	0.417023140795005	0.1421598039485	0.238853445910268	0.0426508687525954	-1.28468149837001	-0.384437041823034	1.4768884850268	0.222165765695358	0.176144927189755	-0.36176321730631
ABCG4	-0.63193532880391	-1.2161949685517	-0.957990723045357	-0.47893180188654	0.0642034294400342	-1.4408216746827	-1.1435242716321	-1.16713038581319	-1.51618138209423	-0.983795955186522	-1.17739534262297	-0.608866316572373	-0.819841439371782	-1.49543548167981	-0.145883867515746	-1.1659891177588	-1.03534926785198	-1.59383377964178	-0.145274242627083	-0.352708072301435	-0.507607346381374	-0.400288242380328	-0.594007312891586	-0.535916439704216	0.863365879250206	-1.09301869251811	0.0237072918793457	-0.432614299351798	-1.04586786249208	-1.59120391576434	-1.05512867185351	0.202452742558612	-0.574243963431823	0.653076942932923	-1.06316319888952	-0.769847102368664	-0.607992166776931	-0.815193202408463	-0.863931022040185	-0.390443702718741	-0.506573668068307	-1.65819161187215	-0.383367067177332	0.111314804196612	-0.525064015999954	-0.197912972654105	0.415765989454493	0.0755960098096358	0.321264506102392
ABCG5	-0.999827196996493	-0.797413425995689	-0.912293673472535	-1.00624880848898	-0.987734517088009	-0.838848066140525	-0.8982765410582	-0.67639014689278	-0.841475076154782	-0.847385253084737	-0.769768679135437	-1.0596497486369	-0.882076247526977	-0.791793968884972	-1.04897079927491	-0.943117648006661	-0.96932947905196	-0.905464074460961	-1.0093369050442	-1.33259957470794	-1.33439067802302	-1.34011087139171	-1.32635790297816	-1.33121387534406	-1.11550781595858	-1.09405690671699	-1.09480354439541	-1.13818798029401	-1.0171614702717	-0.805745696035881	-1.00199392991011	-0.978959320568242	-1.1043426748233	-1.08828480417572	-1.03525598733803	-1.01302870960659	-0.982186884961014	-1.33469302644595	-1.07748866973825	-1.07031590070098	-1.06862844334044	-0.838059007655064	-0.781816714191157	-1.17799280562277	-1.14290205350248	-0.99733791111409	-1.11080045700896	-1.07729256882919	-1.10303716989743
ABCG8	-0.37049539842781	-0.122095472260488	-0.150155499822577	-0.139912942066447	-0.0776028725064803	-0.333706620963205	-0.111525714911249	0.330550776221393	-0.134317188586725	-0.0359482344974596	-0.0634490113725573	-0.160401674235791	0.377817907498718	-0.138460010498148	-0.145588234166676	-0.0433286860773308	-0.114862195609984	-0.0282826010874357	-0.13812840041247	-1.10994214244622	-1.12857309103406	-1.18347518466504	-1.07508635366951	-1.14332447441116	-0.167946980208196	-0.170296779078095	-0.158074697926653	-0.956087781995888	-0.164402656210151	0.10276665608358	-0.170612253590938	-0.118430711453353	1.39045668828769	-0.109165537785361	-0.13113590758111	-0.131849009642764	-0.15969512704569	-1.09987459322587	-0.187106314725739	0.481965630758782	-0.144074049179538	-0.108900363454392	0.389700052938999	0.275337576988972	-0.0828593542863527	-0.139069816894209	-0.0532131035110363	-0.0917664725215871	-0.194770875883305
ABHD1	-0.769768679135437	-0.325386716436159	-0.348645122350798	-0.560441442802852	-0.16872374498662	-0.318131793713012	-0.283149258282267	-0.00498034628621008	-0.269999606396311	-0.344937332839475	-0.341342108800776	-0.376570404355506	-0.116983037253979	-0.254061900159817	-0.511873963053762	-0.412043606638415	-0.461074593186261	-0.173084549643123	-0.585179883817749	-0.504801506491942	-0.322541339746767	-0.414502116941544	-0.552321346930175	-0.440295197356438	-0.592978104175697	-0.775289150679725	-0.233117646509495	-0.532273756010414	-0.448746749643368	-0.248040294766326	-0.489809950695409	-0.414596698400187	-0.540979204776815	-0.535916439704216	-0.477433183940173	-0.303747149797966	-0.45688888340687	-0.411482974254402	-0.58472522499676	-0.513572103395878	-0.547130299093874	-0.353470903546934	-0.385706679303474	-0.520576367900539	-0.594686974072929	-0.429847985951413	-0.563086727768776	-0.292170046505527	-0.611829522195589
ABHD10	-0.508096991979683	-0.214344177156975	-0.243646939022073	-0.332615150373765	-0.554681175855509	-0.0561114641961569	-0.394165952353485	-0.768025688625369	0.137540687550765	-0.575577838394723	-0.767317808970158	-0.231318043524739	-0.414885691486153	-0.357660783319591	0.771913570744067	-0.235493505262208	-0.515076451104281	-0.420302876821982	-0.0356120710793323	-0.242551834923941	-0.409369155554738	-0.558673459861855	-0.429668298432607	-0.648299669612326	0.106609640259742	-0.403585505711884	-0.648649279015959	-0.565624787947602	-0.504894776760304	-0.521232047014815	-0.376913876760344	0.592618273190065	0.380532367329479	-0.718253969222826	-0.155931627900926	0.0285032370208373	-0.0729562905149634	-0.391808830586594	-0.331785091087803	-0.208220870086621	0.0704320330344935	0.136039280867178	-1.43934070968751	-0.691445257057258	-0.342012593181752	-0.670712043510514	0.00471126914769002	0.495172770522717	-0.610173972394815
ABHD11	-0.821749898115883	-0.515613699964696	-0.188581720725194	-0.767317808970158	-0.522466552628797	-0.367979129194664	-0.710774159782033	-0.457626583702204	-0.180644847314625	-0.412043606638415	-0.643281465226093	-0.478794205523181	-0.234024306604517	-0.621714851842689	-0.343343303793614	-0.107182564320276	-0.568097956986942	-0.425228567230794	-0.570241006041908	-0.625846178804612	-0.701755263019269	-0.569765376119459	-0.557012569355324	-0.543627378943845	-0.220828567022531	-0.537847578685347	-0.583414982637992	-0.803871009733636	-0.460879254242611	-1.01461732430521	-0.419788115471571	-0.63356123118595	-0.763030579983976	-0.469388283513534	-0.467854836593224	-0.621605542340326	-0.157447622869411	-0.452626615226124	-0.713366052250066	-0.589554794711762	-0.597242611394444	-0.46575384431469	-0.461428948674106	0.109346208929	-0.525795427506672	-0.417377163018725	0.121693850001394	-0.444322727944428	-0.850429313932094
ABHD12	0.630996529122761	-0.0551405104120423	-0.558858740409239	0.148040209477961	-0.418926689428926	-0.654237331288579	0.366192997302206	-0.161799399613251	-0.310086677832556	-0.809645003758498	-0.0271485149104631	-0.34777217740793	-0.497603223364547	0.40738808667372	0.408874921467776	-0.0442539969232111	0.0768757198199918	-0.59547767351661	0.641751306993562	0.417430563948049	0.17905448180867	0.421796124003146	0.528891932910855	0.207610248793871	0.642083964082108	-0.317746714745196	-0.367859978819858	0.396657671940445	-0.171600256537733	-0.00168828865667924	0.379276474369776	-0.323710308324842	-0.84716196274279	-0.0708973101634295	0.0501452010169804	-0.197912972654105	-0.1681584329924	0.246367900557722	0.215905656956832	0.699644412903285	0.426935025746021	0.178058001218584	-0.176014076669479	-0.236169673250654	-0.354276987425591	0.363875596260324	0.821617038369463	0.671531393949238	0.755491748838143
ABHD12B	-0.0324937191472442	-0.694266583945374	-0.795868504217407	-0.359463166486671	-0.205417795528107	-0.343557784026173	-0.642147850158626	-0.319981193870554	-0.598313194049305	-0.412897103413597	-0.397246233405625	0.000503486797376795	-0.515613699964696	-0.421638277842073	-0.239970442533695	-0.622172333211246	-0.773994505738943	-0.421411628175061	-0.790574159131648	-0.856230951697667	-0.908332182922114	-0.808673611992802	-0.813551276010087	-0.787189572986582	-0.295933514792034	-0.417559248238686	-0.382790580433208	-0.7471401936025	-0.578536199037301	-0.444857176577967	-0.892008068300087	-0.709986225090549	0.402505665251923	-0.177636452775154	-1.00636819156736	-0.592636899214427	-0.786747704275752	-0.495174738822611	-0.86432781817674	-0.884825555640462	-0.929371725985612	-0.899730617770106	0.521725404311377	0.259795715786599	-0.638441353460796	-0.38367746883267	3.86004012697074	-0.725765482762527	-0.846905686458969
ABHD13	-0.0764930146464166	-0.477377745400581	-0.424553708773883	-0.545547110575805	-0.64177082613164	-0.438572747278496	-0.396950772724433	-0.581568564796728	-0.175549452971445	-0.684832361156413	-0.385088020166652	-0.304283783469422	-0.614683437910315	-0.531668632542466	0.117663621464443	-0.201458979853484	-0.182425457813643	-0.714797092911836	0.259099054030907	-0.0542931825882338	-0.1377260941848	-0.271168288013816	-0.194840306760728	-0.0936579477054056	0.379121323339447	-0.341665937350309	-0.83748165009445	-0.129548889446148	-0.69788505575916	-0.959633051169238	-0.579703209382349	0.201581795288392	0.112041752577466	-0.184287710524779	-0.50684538510288	-0.173019436056375	-0.137300411636684	-0.114538326792253	-0.391151261422922	-0.520576367900539	-0.567002575519466	-0.28775131278003	-0.0565846820171331	1.12109565728057	-0.157999312120907	-0.775839226208025	0.095545980916306	-0.623554055989161	-0.675599647147311
ABHD14A	-0.577838992723729	-0.540229597559415	0.119413604459797	-0.447124970418152	-0.428482585366626	-0.295207985362038	-0.473640731392741	-0.663034539698704	-0.0899526815636948	-0.842507700426055	-0.926228896118244	0.17453333142227	0.294447356260393	-0.565758271735789	0.0802498552852003	-0.216140896481186	-0.350018667115669	-0.16429128906449	0.0130603677329148	0.0262787797542251	-0.0334630398427671	-0.0444182258642499	0.0156478641009752	-0.0293192537484164	0.0819413302533821	-0.103619959258106	-0.352010617606035	-0.196297706224359	-0.13595182196602	-0.82028008859096	-0.292122165650657	-0.900993089176638	-0.702134460054883	0.0215271236360025	-0.179870154311202	0.0713228215048076	-0.0153494533218477	0.100878006364563	-0.467167414468681	-0.0842288883623597	-0.306071215598309	-0.357872866455331	-0.519819430530633	-0.11273908133031	0.0366871673527953	0.150706753748003	-0.0387736717417852	0.222270963462831	-0.0958486984148424
ABHD14B	-0.251327621724251	0.322415475434742	0.637867383903881	0.204134097748103	0.0258042024531119	0.0750103357782025	0.454399017285165	0.405518887581714	0.174433099992235	0.449600950267819	-0.46079992415691	0.328271547405656	1.02625341699064	-0.0543234028118463	-0.0214969165731609	0.357107480461789	0.315757760824541	1.2793339097322	0.323320783089624	0.130418952687908	0.291376661594501	0.271725389291006	-0.13901928471318	0.287296512928971	-0.859596743536612	0.404543934796744	0.271614852608784	0.0591838015374391	0.718927055852127	-0.224082809195417	0.288226437771711	-1.36205610340199	-0.202177224526889	-0.396475293905177	0.266804018011908	-0.168953045435425	-0.354881593332865	0.268535526045769	-0.422098681643192	0.717369533714222	0.349596636640032	0.0154068544066015	0.272061262514996	0.433806079414075	0.485203594222565	0.604869383915822	-0.00141469024460248	-0.592978104175697	-0.00819479377021703
ABHD15	-0.0230344530052392	1.22874349653564	0.53120802255323	0.392528906141842	-0.251752574503384	0.446650285549574	0.715381738022015	-0.0436523877292329	-0.158775540765315	0.85262304763859	-0.0748340937901303	-0.258928492514783	0.067925337767047	0.259499037338081	0.298821533502712	-0.0765489883258786	0.91061333327558	0.193098490084241	-0.191315725629675	1.89127323188995	2.48902910532388	2.10215578497527	1.51786067841567	2.04263165448019	-1.19747438332159	-0.350028462904852	-0.318388166677566	1.89675585661584	0.604869383915822	-0.171460686941428	-0.0148670341775679	-0.121137286898035	-0.0772123801064444	-0.159293988886864	-0.00364778330136126	-0.217559245718779	-0.210372661842243	2.10953210770358	-0.222032788703092	-0.18207894871161	-0.234615836449418	-0.235498625505976	1.84249688436627	2.7924297775653	-0.161369938397297	-0.172865246542004	-0.29146347198413	-0.224944457067527	-0.202104674680276
ABHD16A	-0.0481588381686735	-0.224281426588095	-0.299854264699726	-0.170724133068727	-0.430486107832681	-0.289554287760013	-0.18793461361464	0.171647185855293	-0.275305467192877	-0.364929278857532	-0.232583630278094	0.215802950276865	-0.0247137254934308	-0.0101402470806235	-0.161076642915377	0.0252116581638779	-0.38102583936127	0.297515311587995	-0.348531514720399	-0.255924966383368	-0.188956637067022	-0.207949933481261	-0.169302260542861	-0.211132477647112	-0.194205611576009	-0.0334075638750357	-0.472939304146033	-0.113581005816789	-0.236634783398632	0.0343091635569017	-0.21024786085309	0.381748686422352	0.0662520843854098	0.252128293248797	-0.331968050400468	-0.140102736942573	-0.0542226560449257	-0.299630608625333	-0.0183909052710233	0.145090129723044	-0.0989958383460402	-0.135152284983063	-0.00123488088196797	0.168426624307758	0.262769571022029	-0.270070275749995	-0.08017872266114	-0.241220016430877	0.0869610222073279
ABHD16B	-1.42870913902482	-1.25800711617712	-1.33506781552212	-1.42163912295277	-1.52454956953436	-1.22414707707925	-1.37113972775054	-1.18356281199739	-1.30249254632732	-1.33892806314552	-1.29567388553867	-1.54416671259529	-1.26362071118689	-1.23678119458251	-1.52437282585489	-1.42380374053175	-1.38209399405546	-1.28702128751718	-1.45762540780413	-1.63810880597351	-1.6226669750615	-1.64534742335334	-1.63209790863601	-1.64291500997861	-1.58464286917886	-1.60590453514304	-1.60945573968872	-1.64243960165498	-1.45420045747132	-1.35634714560464	-1.49044140315521	-1.47449158161131	-1.61948572454735	-1.58773611676797	-1.52311687978157	-1.59791388722349	-1.48853430976122	-1.63505624191845	-1.56344765178988	-1.54592557800398	-1.55027755120402	-1.37338450817811	-1.18852513320541	-1.45287586856881	-1.61111608075425	-1.4817617104811	-1.42067572653451	-1.5651215903086	-1.56209493506915
ABHD17A	-0.136556181116004	-0.460994965944466	-0.371626710508677	-0.225061129759259	-0.617878764933478	-0.451268607495788	-0.0608603601129865	-0.110341969762555	-0.31841328234191	-0.0603744705671748	0.23745907474705	-0.72900065342397	-0.427064388901307	-0.0876904614713472	-0.827387989686763	-0.662003040099754	-0.271314803230217	-0.365448682921757	-0.533650213179523	-0.375041291998665	-0.351524412146065	-0.313287129965814	-0.320053690128467	-0.299725787247782	-0.354792455420012	-0.49842376444458	-0.504221577413571	-0.249594292278204	-0.082275372858602	0.106693922848979	-0.32602132822902	-0.106166964280805	-1.0419713364527	-0.645497580010095	-0.250675838811806	-0.311847844202477	-0.365362821493226	-0.410053675936843	-0.550752106125868	-0.347953375720169	-0.275539325645502	-0.142977905355185	-0.12025143486499	-0.244564067742095	-0.489196688757972	-0.118701414325173	-0.341575198956845	-0.436567363575902	-0.381652350839938
ABHD17B	-0.0198424742281728	0.261497291458124	0.0300848822606582	0.387645226399595	-0.197741727676842	0.396611499394604	0.38358598455677	-0.285225728316727	0.383731203680405	0.189816588578581	0.365407439655993	-0.13357922226385	-0.598851202349463	0.517683580739462	0.309380236090386	0.309893160671251	0.070048561588398	0.349833035050215	-0.123037855289606	-0.162234516136064	-0.221529911226451	-0.610485591631102	-0.218135461847391	-0.589340961529409	0.040285605468148	0.501684007256549	-0.185088601493723	-0.500477656336721	0.609914387324644	0.270633102061883	0.410250082175353	-0.620724862400509	-0.066357559220364	0.301566800144386	0.797478029649309	0.542503620918797	0.320959363933411	-0.261516863104215	0.87376358482352	0.229634667314728	0.434336987165062	0.967058396318428	-0.0577236151778735	0.276847477433614	0.558001672264845	0.309851812599705	0.662714334605342	0.90989009332913	0.339958023770551
ABHD17C	0.550981113776937	0.000971031116165749	0.51096391777272	-0.0806803848949085	0.682966828302133	-0.234344097177183	0.0402189058513085	-0.604636034845343	0.318327820903348	-0.613549876357334	-0.923020753876496	-0.362786082774659	0.309893160671251	-0.794272399052174	0.512875470851399	0.137376206854859	0.100712536634155	-0.0210395254591616	0.595042605754448	0.185460733368086	0.287587996121081	-0.0436214475891549	0.193652298463114	-0.165438295024336	0.557196282899909	-0.0891840782510742	0.658440392059226	-0.268129163789973	0.039388594782669	-1.56323631891774	-0.0879693346404777	0.38937552687895	0.779065948317657	-0.218257214827244	-0.00400819325956025	-0.650829330924806	-0.383894181329466	-0.0664842266664808	0.395429729533098	0.739627334730656	0.264071619329824	-0.726689711918742	-0.755327367288952	-0.507052060775235	-0.0145638483711992	-0.608386388125116	-0.789387999061905	-0.724525862259556	0.310233537692844
ABHD18	-0.633648228561316	-0.134568236096529	-0.285157433568016	-0.235196122040671	0.560244761675241	-0.0696945926061641	-0.260642600620893	-0.764766273195808	-0.0281381880668433	0.403821162018788	-0.41091671260595	0.452117001259552	-0.865940124826229	-0.205175084883703	-0.178665925162799	0.185318867195259	0.0539878502545879	-0.251752574503384	0.057904453399128	0.280645082157994	0.301688278886646	-0.0338916453597689	-0.24113613196756	0.210340822396066	0.269344166177141	0.132477144527085	0.513408883134961	0.0166172161021352	-0.00704201631034928	-0.925964573694891	-0.105892849704366	-0.495357280191599	0.208974720736167	0.704175604763888	0.175972045409965	-0.382545655596007	-0.22223087372299	0.128095950485551	-0.0148947638040961	-0.38485368324438	0.0814088906141001	0.310862349382031	-0.210748180797299	0.219994828444735	0.0752505680915745	0.0194282774913082	-0.10457252949744	0.00917953455476121	0.0385356149687296
ABHD2	-0.637141297319038	-0.572223698663591	-0.383417237958245	-0.415444234483436	-0.574158918619362	-0.846567742720273	-0.558177445127676	-0.68146163056548	-0.467698642236865	-0.593457763244666	-0.34749516034015	-0.46796389449538	0.440857587643615	-1.51312022155505	0.0763056041703463	0.0897350730002346	-0.187128569589073	-0.0462295660994679	-0.374066068320571	-0.251064754173724	-0.336714076753029	-0.547320973938987	-0.0916979533765229	-0.527377556903659	0.0638315830725791	-0.201677797115844	-0.719081117449649	-0.378364318570796	-0.981308301288114	-1.13216466002129	-0.213177826694038	0.563856463140277	0.440399745432353	-0.241220016430877	-0.430354004414163	-1.72753285073093	0.312789823198146	-0.647015560099376	0.00153867734799047	-0.494177434198012	-0.0270574924404149	-1.02549249820554	-1.07606564476816	-0.105757705836551	-0.389324347713682	0.211153760404496	-0.546607867101027	-0.991597020550536	-0.384327357006554
ABHD3	-0.0997423803585643	0.584517176193926	0.624301592804967	0.339177180400462	0.799147873403638	0.354061632498204	0.205528030689376	0.249682283663858	0.421581780334007	0.524839347391921	1.4628762087288	0.428123625621619	0.439614280427625	0.883194758945357	0.13599730545437	0.270757085304589	0.356470302068292	0.209992749278586	0.837161248358984	-0.251899761314973	0.372594637943365	0.0568349985084224	-0.0209082139326382	0.407882634879049	-0.00901669243944016	0.436888242058489	0.751321943347738	-0.022051411287074	0.414501340867535	1.40542379427446	0.38810013968448	0.0522524060504895	0.234295216505555	-0.23541947352991	0.496855717667185	0.484325110361362	0.822898244237119	0.107262537239644	0.335020683619265	0.356658204075781	0.48949311986879	-0.123341811929258	-0.825723084859961	-0.66690106717481	0.351376308551503	0.742859024708389	0.394958928971842	0.123188604767076	0.428829231152202
ABHD4	0.187048669191471	0.355223713736902	0.530072395217963	0.177820170273665	0.0671366786763517	0.164981883082986	0.342479663651981	0.51696725655089	0.34518234823762	0.56326303119746	0.162987711883721	-0.332386299427301	0.394070215003264	0.271297332662023	-0.0754694373721612	0.133967166657299	0.0739347750613018	0.101860415109216	-0.0880017613329577	-0.383994656241977	-0.391266787351372	-0.189475565699396	-0.409086873943692	-0.145084464644025	-0.665500705602414	-0.142219345807333	0.0576183434614511	-0.278165342090571	0.318875434861229	0.320825397337581	0.203189050312884	-0.166748262916365	-0.581690374740353	-0.696709167530307	0.1011537848713	-0.278900316951557	0.181462718764887	-0.325108926376945	0.333553805079353	0.190129491531654	0.431971402397718	-0.00741213635624437	-0.258436792004496	-0.934400559134491	0.0223019994260759	0.109069911809437	-0.0809753101035332	-0.223021810847431	-0.0230607641752116
ABHD5	0.162834420481465	0.594752695581028	0.185943561867558	0.520915742853408	-0.316906613261514	0.0223297144282067	1.10252840958651	-0.212073946712803	0.305884376255656	0.0704222161254141	0.248619023138501	-0.00810864941656103	0.0977912176973648	0.839639363576801	-0.318054927123333	0.202948821920251	0.0840605646636736	0.0330544702348559	-0.12443931486837	-0.262035551414904	-0.143391676851806	-0.281067044826366	0.80484940215464	-0.159167653077774	-0.226161983487173	0.585820209111884	-0.257987089013582	-0.176959679316476	0.282192226118483	0.29164763137103	0.355680180471059	0.0632905439373777	-0.246586626954498	0.0787877885466277	0.289361048912521	0.070027489557771	0.794211077382648	-0.0363686308020883	0.444760041459268	0.00160181502041312	-0.00205273843444434	0.366129881622626	0.580543960961532	0.0427153413247392	0.326634648602897	0.0081869401537474	-0.0281149848323571	0.245582580203292	0.929241326733203
ABHD6	0.155155391480438	-0.368285538164774	-0.503946416623245	-0.0662906466436221	-0.810093524131608	-0.127520729619299	-0.00912082755071889	-0.946525350698418	-0.158184198070202	-0.985875169273065	-0.150983989139166	-0.705763570252602	-1.03002131091496	0.271183602924747	-0.143305314701	-0.593180370225544	-0.482451569388908	-0.204753857532653	-0.235442462862513	-0.116991273792229	-0.0456866016329331	-0.107624389440816	-0.0365741114814545	-0.30015117358792	0.186800200371846	-0.383201592200448	-0.831683302918337	-0.0316899515411009	0.0017941280963378	0.245375143801661	0.072476123105043	0.0501452010169804	-0.435358844139189	-0.425367709692091	-0.0293192537484164	0.113967241232403	-0.38424994117485	-0.187045478187772	0.125840817313669	-0.135745632521376	-0.388570737936348	0.435547744702142	-0.360177354606433	0.0332564381220883	-0.0386303678278729	0.0598809906983327	0.401384816844369	0.496855717667185	0.21911362598329
ABHD8	-0.204097121954864	-0.808701038054378	-0.711009088382887	-0.33584588125673	-0.567227246157473	-1.5429045634979	-0.343701774077435	-0.372160485253655	-1.11160223485723	-0.444735065847772	-0.264888550551538	-0.353797462628827	-0.358287206085429	-1.02336945940414	-0.655692877207647	-0.682001879957064	-0.516990237724155	-0.447990762172396	0.0171689042815199	-0.21356257305747	-0.197437895105303	-0.187291393642538	-0.337660609175692	-0.165164426406594	-0.344284667001755	-0.981667911785197	-0.584303548643182	0.149433932656765	-0.574137128012314	-1.18797462970837	-0.911695134468112	-0.749176663724092	-0.546221483270069	0.0726462311716996	-1.11512637062644	-0.605560365073668	-1.31253349359017	-0.354276987425591	-0.587766081257885	-0.590115542940861	-0.564611221468834	-1.95676450893203	-0.286176364738007	-0.291617770886525	-0.635096099781491	-0.485292987315905	-0.529344240541843	-0.752911363879325	-0.45836530106357
ABI1	-0.000834453105205557	0.07124913266407	0.133967166657299	-0.344121900579082	-0.0837832439586647	-0.143924679271194	-0.329603612319569	-0.329959184758367	-0.0187242808819595	-0.34881141107807	-0.0653634292013296	0.250083027712562	0.100912419284237	-0.544679282006089	0.149926867288011	0.279510677169567	0.12306125846859	-0.34777217740793	0.41889903454652	-0.219957832808487	-0.247569102294053	-0.348149010379037	-0.22237975038139	-0.212198890322958	0.242171872102152	-0.0322614122942374	-0.121434739556436	-0.530379039216627	-0.356552189691298	-0.622934024180658	0.00998560098612878	0.17302114110088	0.54419254774712	-0.0450424047258182	0.0236352357869367	-0.566456164480977	-0.0351557620607454	-0.431101595939345	-0.021845672260968	0.561770890380974	0.303217513277187	-0.592184055792282	-1.09561576964611	-0.754416602663816	-0.486939744903312	-0.323322380066372	-0.792095757835549	-0.424305973290982	0.428327036284653
ABI2	-0.464921440664823	-0.598740785860723	-0.228593766378769	-0.270211422436448	-0.013300729611998	-0.322560302836377	-0.453252438471074	-0.451770356222261	-0.264668330268306	-0.269098027176685	-0.415444234483436	-0.133839025111173	-0.32146883809409	-0.636481669954973	0.0341579767258258	-0.0668653517786965	-0.431344205893268	-0.21284344910486	-0.238062481431357	-0.449847934533546	-0.47013921157946	-0.632106005050266	-0.454336133980847	-0.830755352852234	0.256656260435428	-0.278540225277425	-0.0827331667602127	-0.727987174079395	-0.528008854935966	-0.421766876368206	-0.395183803006233	0.10563003772586	0.59220433567418	-0.0620939771021212	-0.407805839919692	-0.547024933848833	-0.55372973883968	-0.736424814532735	-0.337421026522012	-0.409793331181817	-0.39187199039767	-0.423007215621245	-0.492625686062651	-0.38367746883267	-0.388570737936348	-0.386149478906017	-0.433947932016499	-0.350870577236139	-0.495427870751935
ABI3	0.361585448972807	0.926974276599162	0.0608084896076166	-0.0734638911154406	0.0357189334610261	0.125193009178803	-0.0155691112620272	0.0157308407953771	-0.106271460828561	0.0381502759697546	0.721183887745885	0.377075275572578	0.19109956672148	-0.0349420152249776	0.00641076175892659	0.710497639152857	0.490169825606686	0.188224011179604	1.09979488445971	1.07310014543641	0.684868134008207	0.761572163205695	0.635933411658584	0.805840336880461	0.0826805622924089	0.238219342750271	0.29251874159845	1.27874695242474	0.0888150648962569	0.230177157535157	0.444220839701777	0.132553858554838	0.272974514010385	0.399210001636897	0.234499527797096	-0.02989452738865	-0.185780018510763	0.306755155680265	0.173774448909131	0.242984453692562	0.504794279760366	0.022447628878751	0.574533254619014	0.822898244237119	-0.0648776638981958	-0.980777968145379	-0.304769135231104	0.0776382250379245	0.427078480539644
ABI3BP	0.410480823811468	0.876262973720403	0.994912056099443	0.327199251990711	1.187533444675	0.482103091666883	0.419797491150561	0.429064283268154	1.20292179400148	0.0303552051068476	0.0780513130631644	-0.925499554770031	-0.544508533962626	0.295825875630129	0.119828391073675	0.625163407114121	0.724265648464804	0.404152465632928	0.510747644499119	-0.121493619103878	-0.222797709609614	0.0618966840121675	-0.0583782456051773	-0.122296282806638	-0.141928181563385	0.0360800427342992	1.16097576500372	-0.354276987425591	0.134556209260373	-0.00272123572343367	0.639792997032586	-0.504522648410078	-0.617452372095965	-0.842442920592491	0.13397876926764	-0.132431170610878	-0.415378540448997	0.0727535041530233	-0.270127777645828	0.576018892536408	0.195376297293718	0.0222377747355506	-0.091465368364875	-0.523729223460821	-0.243991626403759	0.0944814556869562	-0.888546225715449	-0.603725850490692	0.143805578375645
ABITRAM	-0.0393184115044908	-0.122386934819634	-0.186690795910207	-0.210697114380027	-0.455384736357069	-0.00897135555791012	-0.539510387805988	-0.437872484189387	-0.41133331477642	-0.390615146326803	-1.00055656531157	-0.0690209097530131	0.0896307032920041	-0.460489228828848	-0.0278162515344072	-0.344454442864726	-0.191315725629675	-0.141223690223683	-0.300592617349509	0.0503161877770883	0.205649176608659	-0.011651779452792	0.100493158308642	0.0979018057784997	0.171655516319862	0.015959999289028	-0.320053690128467	-0.0483604700496006	-0.291961987706288	-1.1791715414491	-0.0285219181384354	0.169697227229821	-0.369168363487211	-0.470948948730192	-0.139536261445358	0.0140479520436544	0.446484076913071	0.0345834005072284	-0.167661717276974	0.0043280848474606	0.2695824259145	-0.250271828456304	-0.319516416025357	0.0944049139862935	-0.0886116272223597	-0.205000695731837	-0.0686604089726246	-0.172012146757011	-0.25572115389051
ABL1	1.13188320976876	0.199668982481874	0.358636743227703	0.743743193762408	0.424962112440294	0.497902412326721	0.828793409093652	0.653879286558193	0.471456685856774	0.702520673846774	0.612968421723145	-0.331871215543023	0.255046259839955	0.674262949775519	-0.0564336144643905	0.352250262819267	0.371183364654213	0.701311878144305	0.0740246729214701	-0.149129666848006	-0.0571615746998285	0.02159005809074	-0.0545831013583879	-0.16916878354754	-0.0999564450081732	0.643939780161526	0.536188033841828	0.0162481208928055	0.923845202899156	0.930949243042594	0.390134047873277	0.156720599342727	-0.530862019303229	0.512302563915703	0.663675693993345	0.359300828992946	0.249990055136443	0.148772899858361	0.552093636420853	0.476828954236769	0.216894249333584	0.953412743905655	0.927674422318703	0.417672342557434	0.815038222506041	0.898701311588737	0.269344166177141	0.25126483877417	0.403237752765916
ABL2	0.205820824354583	-0.184074943747396	-0.376020802720642	-0.0780957675789772	0.225135851359384	-0.37875056953976	-0.057573496892418	-0.248124247488071	-0.394761337688465	0.00120019264334567	-0.282958093213599	-0.362032459861511	-0.467034296046062	-0.159401348838544	0.282039514297308	-0.151058733407986	0.29686086592891	-0.390557045474493	0.366476470018774	0.220918897997308	0.200725420061092	0.608902813501338	0.309285832243352	0.140696074349782	0.273709607103246	-0.38424994117485	0.232878707806664	0.269218603223768	-0.108960556394131	-0.0419819478572018	-0.0591254051230992	0.223675778714948	0.371673639680122	0.0880321557812605	0.0507156855962191	-0.0125275479214728	-0.242332748427958	-0.182473049366276	0.0541108889293935	0.41647582901247	-0.0558833159652765	-0.195026176224909	-0.344356978777817	0.0610796515792191	0.0505775306416331	-0.0171686615289887	-0.183690793969578	-0.285995540344271	1.24198924759392
ABLIM1	0.514380000549479	0.338809744516443	0.511609413888539	0.173951277999714	0.528567780395377	-0.144425012326177	0.287836990014766	0.920535719405616	0.387279810761887	-0.290907363533048	-0.0953578712799478	0.291253429337521	0.576875503487584	-0.290153493943923	-0.506755293994117	0.837161248358984	0.591249953533827	0.638928460099014	-0.426370015949897	-0.187701180043632	-0.387143774020525	-0.230557546138515	-0.350548677416764	-0.339733141564029	-0.356965020223204	0.162629471139583	0.603471935649103	-0.106883331671539	0.243138429856508	-0.688976678848364	0.358877410594737	-0.327200770215653	-0.401632364942882	-0.436767042932873	0.188982245863375	-0.817878687326591	0.0755172359058966	-0.350699166443425	0.145582849696631	0.766070013447218	0.082435600492788	-1.16513500148126	0.411710256611455	-0.00104321504833855	-0.372954187067367	0.382649756345708	-0.45283757168671	-0.791413632320952	0.0252025587615685
ABLIM2	-0.808868221330993	-0.97362999176457	-0.878432799000642	-0.573206350184542	-0.383963856068366	-0.564596650901695	-0.840736498317692	-0.939017475949479	-0.714881744246573	-0.412181741437288	-0.824519536775747	-0.145588234166676	-0.551041043590687	-0.667549392005181	-0.417795548107442	-0.633824721923149	-0.898518064735858	-0.573098122516288	-0.706708670350895	-0.367859978819858	-0.465087170399979	-0.367719980861219	-0.451883000085093	-0.337744126407065	-0.502430433557695	-0.604218309611003	-0.423953922773288	-0.327357478019901	-0.760836672925027	-0.466206168762034	-0.928219063348518	-0.163903654783988	0.591121641351627	-0.363018049092398	-0.837786415971295	-0.24107051122836	-0.582592251905351	-0.447205242338344	-0.54991079778223	-0.991303131309937	-0.921559980890509	-0.552697140417874	-0.319361121235916	0.0392428917125787	-0.575044446227886	-0.977504873458657	-0.46013045799716	-0.371763922995148	-0.732163488930769
ABLIM3	-0.676585281399717	-0.237370738084136	0.126496895219625	0.102414313246671	0.69318537661701	-0.428741260728041	0.199844999425709	0.911297525665069	-0.39799501248924	-0.289163539703343	-0.485622620775193	-0.304981453867178	-0.387864557268915	-0.159650820444412	-0.474176895752344	-0.0747869495248831	0.309380236090386	-0.333901867016734	-0.0713193852165194	0.318468104664762	0.31227003506643	0.198892980848723	0.250299788372758	0.181650665348323	0.262500159811258	0.197297091653762	0.379405129755307	0.0726462311716996	-0.228095620931791	-0.568988190399203	0.198975311891928	-0.369269932093968	-0.145466684740792	0.0768259766424974	0.00556518964001245	-0.473833187070706	-0.353929749153465	0.312000293638335	-0.152842584599426	0.843973243720536	-0.705603802272177	-0.776166852369082	-1.16854108271422	-0.973131128444772	0.280915510792161	0.301926185192258	-0.92752916754459	-0.0455110063684498	0.241704635922398
ABO	0.0654064616562049	-0.279933425872986	-0.266248042910519	-0.330030670357337	-0.123037855289606	-0.120618975220918	-0.285534538371146	-0.190923011108394	-0.392930477344178	-0.119978004333031	-0.153914330533847	-0.347303572261981	-0.14162600403905	-0.222706838712334	-0.296500745533714	0.0586336958791382	-0.273591521917146	0.120544326496979	-0.299593114984534	-0.246111734524355	-0.161123824956816	-0.0785844959876967	-0.202455459016395	0.314308435485006	-0.294292925934404	-0.428716321705784	-0.179097050664739	-0.110992765074253	-0.380769828403416	-0.190371587605252	-0.291039147352101	-0.204105849782413	-0.102721489414858	-0.0375273652557675	-0.334651206937485	-0.409876989340945	-0.156284283014247	-0.150842717849824	-0.250916878671732	-0.284965860523761	-0.292394532144918	-0.225198473163016	0.0264803133048153	-0.0334075638750357	-0.519637462339946	-0.267978691145566	-0.40530006104415	-0.282127372498987	-0.223102211306203
ABR	0.100251570740158	-0.235442462862513	0.341692990762411	-0.113822645066166	0.0134718061312139	-0.56310620500862	-0.1972412432708	-0.276901242746805	-0.271878684439829	-0.605973598958701	-1.00588142519223	-0.0510657493307821	0.174962180167718	-1.52685508930085	0.628717439363837	-0.00155957189189684	-0.161306382086191	-0.468195938252691	0.618531913151722	0.0536440647853693	-0.104887382558412	-0.0983896653377189	-0.0325662080315921	-0.15130874832994	0.248629774234065	-0.594563967288257	-0.0503717393971342	-0.129034596849014	-0.762374072273688	-1.39313747969731	-0.527163213984606	0.478481098141256	0.591659778614578	-0.0805488817496589	-0.5296063056897	-0.817581312073	-0.714583284784001	-0.312856510399096	-0.20073563405577	0.159783000710481	-0.489809950695409	-1.21484422458887	-0.109818068720443	-0.345148946713389	-0.3270470543004	-0.735275425300652	-0.572710962369138	-0.282914316869953	-0.41997286079821
ABRA	-0.802611451618118	-0.619741685825835	-0.779797919104502	-0.856122305527872	-0.787994410296556	-0.737412969581283	-0.756408961088617	-0.534709668722046	-0.708425690459907	-0.635521640398486	-0.642147850158626	-0.933612105709473	-0.725528804139176	-0.655222941230151	-0.926100896196987	-0.78208881718381	-0.849905057031491	-0.787347654974989	-0.879721025475048	-1.19413955485841	-1.21425661869855	-1.20680907985917	-0.965176179499327	-1.17949335653074	-0.965053541407437	-0.93875042634797	-0.886825211245964	-1.165867911521	-0.83256768214527	-0.632330743936279	-0.859596743536612	-0.772941363974327	-0.867499064417281	-0.898096914390611	-0.892462081009031	-0.936548433524611	-0.843935210097467	-1.21240344112738	-0.916514920180332	-0.924990544398478	-0.940384156817468	-0.643733837369313	-0.409701314699078	-0.905175454244022	-0.965676114875231	-0.829579148840491	-0.899622410243668	-0.935352176240479	-0.957496403218115
ABRACL	0.0946155358291327	-0.51684496741813	-1.41943167690216	-1.06545830177598	-0.481841054438651	-1.47646213500347	-0.51684496741813	-1.9495619914299	-1.74448356897704	-2.13377394897321	-0.168559624281831	-0.274427924447231	-1.47421738641834	-1.53008906475631	-0.165933185174349	-0.158656509263387	-0.166268811846748	-2.42522330889306	1.0764000417736	0.740460513817179	0.595253340084216	0.798925417971457	0.677236290459862	0.774602089474727	1.34287054053085	-0.547636788641614	-0.554505036276404	0.792760297916746	-1.38787707701517	-1.69390883565204	-0.347002815956385	1.00414737200769	0.742859024708389	0.164837450275143	-1.0823923325909	-0.533349635711227	-0.943606231075438	0.268228053664169	-1.07219001853688	-0.420946906085264	0.192278067215565	-1.37391691597249	-2.40047182906503	-0.958762381462026	-0.71209821694969	-0.696207982527001	0.0104202375552729	0.169697227229821	-0.102888001089787
ABRAXAS1	-0.00933200691927068	0.0491100253744994	0.16883432317115	-0.0433776180573314	0.84757383271326	0.271297332662023	-0.178665925162799	-0.366413176811845	-0.0221291364718937	-0.148236247769476	-0.300128878711254	0.251930456756581	0.0109820202998952	-0.476062978755145	-0.55646203439716	-0.101913337873281	-0.362429588973373	0.18518070203491	-0.927494114264523	-0.268302278290951	-0.287306201684454	-0.285847300132586	-0.322465358341792	0.0337817539440285	-0.296677955193976	-0.360278115841016	0.779826074749993	-0.437305701087502	-0.273914805021586	-0.196143634248771	-0.272343346392872	-0.428786407872388	-0.311649731106533	-0.304400640571231	-0.470223592038734	0.368490941713284	0.0125917276473504	-0.307657508343237	-0.425837847047295	-0.418430577950341	0.0261947628839029	0.0620559658038461	-0.405859772661101	-0.452242467475494	-0.192192514808563	0.330029687851295	-0.169877826822686	-0.208220870086621	-0.401376737417041
ABRAXAS2	-0.585281171711113	-0.313786092500619	-0.270414300460925	-0.282081761058168	-0.2695789426602	-1.00719413759292	-0.121916779768446	-0.818246886924277	-0.301104802355081	-0.538862106648726	-0.344177971035765	0.373376861522702	-0.308485304712935	-0.781667536116682	0.16815893231824	-0.338751560440252	-0.181717133243777	-0.304786493085586	0.103030524478214	-0.266666761345556	-0.356873611335119	-0.464673652300631	-0.495174738822611	-0.726259655894432	0.376613894305137	-0.164548095606523	-0.256706245899328	-0.236001588834061	-0.0618820605001885	-0.18677201001547	-0.293528857041649	0.0253534886221329	0.11726018198205	-0.0115713211928743	-0.0573101881466252	-0.0197017472180129	-0.0129747524065603	-0.376287382629933	-0.113656074843514	-0.31790252168774	-0.122904305284492	-0.333575696949456	-0.605338364369287	0.149700722142905	-0.0655470451840633	-0.54373248349903	-0.186374368474262	-0.252913092177447	-0.185161790625739
ABT1	-0.233197133414282	-0.432627413714384	0.050181556535793	-0.230555198477477	-0.605525114434161	-0.454782219600326	0.0371688281123491	-0.163206411810012	-0.08603022177324	-0.398487308273337	-0.297886978323623	0.102970034686557	-0.307752852239995	-0.177606620319406	0.0690633121306874	-0.697809030374318	0.115381699339854	-0.230757738685838	-0.256943786960635	-0.112167913594711	-0.0236020001394268	0.0579661282046901	0.0827666298100154	-0.240865026358097	-0.189475565699396	0.042416080088969	-0.642530304662441	0.246270457654338	-0.158327027216176	-0.301235096152555	-0.249086441886058	0.920540331333073	-0.243010190006103	-0.503738808962164	-0.293599968457828	0.0451137092393229	-0.158327027216176	-0.085289337645944	0.00377602276139229	-0.345714738502874	-0.104081884699841	0.160508000713501	-0.427106539237888	-0.224854977180315	-0.15112297334916	-0.622146487585773	0.162247935486458	-0.453833302142936	0.0489715229813817
ABTB1	-0.546186480785112	-0.577689797971281	-0.647065783622886	-0.518366342565938	-0.684616073157887	-0.498919609715834	-0.165863786417883	-0.474046719767662	-0.741213498907828	-0.682001879957064	-0.487470438716407	-0.722452665917783	-0.440330865557399	-0.445144801620164	-0.541084141624691	-0.607021740858873	-0.579331090311749	-0.472414561995976	-0.384133105491639	-0.251299317915686	-0.13990593708992	-0.210538481890241	-0.169369866436424	-0.140039186907843	-0.477898060633065	-0.829065318048976	-0.746736123390133	0.0716407365924183	-0.799115891741725	-0.208949645528535	-0.638025189076076	-1.57844038806334	-0.763313380916467	-0.772019492682891	-0.564253574583513	-0.337421026522012	-1.396523999884	-0.31746248239972	-0.556921651661948	-0.50185173267366	-0.454775398366322	-0.338554997055312	-0.0950448538124432	-0.195116413307518	-0.476837212387222	-0.823529794892697	-0.11560819790371	-0.495257838570074	-0.766536490064714
ABTB2	-0.783602115059036	-0.967661672569864	-0.305331102331583	-0.564947583053627	-0.8933676209123	-0.76419329544926	-0.223262767208889	-0.814937583897203	-0.51353247844013	-0.767210972264274	-0.226668968844791	-0.905967595394224	-0.684751536577299	0.0393290948680109	-0.999998733964137	-1.41040133784578	-0.488714333482121	-0.429365844087124	-0.93769616983303	-0.865008172455481	-0.784352586384223	-0.781245189584326	-0.623146514390534	-1.05440998217152	-0.738121467515713	0.0614587603320816	-0.841201677394996	-0.5743231269012	-0.593313535742525	-0.117971892085643	-0.256351457273302	-0.709246677262975	-1.42750524472775	-0.811431867467173	-0.579048598872931	-0.437078774274859	0.224154946094974	-0.574824149962184	-0.555804247908458	-0.853941787130611	-0.986928380676729	-0.67991189806283	-0.229371436364027	-0.763919514428674	-0.997008081503288	-0.113726288838129	0.471593115252431	-0.560010579390133	-0.494463422099467
ACAA1	0.00554394234199098	0.102414313246671	0.387645226399595	0.214140753129742	0.0445574301171373	0.0905884141927682	0.180827293699894	-0.124166669484943	0.19109956672148	-0.0764930146464166	0.116243699710395	-0.161799399613251	0.644851424197781	0.145240703839839	-0.168559624281831	-0.147791864975375	0.101860415109216	0.337121221211469	0.0535611984826236	-0.0310244964000976	0.100037617103234	0.0903131494557348	0.174190330435152	0.161105098449564	0.0518152401568497	0.257260354771906	0.161428497712548	0.238589573735388	0.398784682108298	0.435918860715701	0.293573810491052	-0.480900009983451	-0.416511861977194	0.280006014814625	0.150868302987793	0.293213489232912	0.476384146944928	0.206029292084936	0.361008520030511	0.0958077435298942	0.149245702439547	0.233134239198878	-0.106605515224278	-0.791160814036745	0.176144927189755	0.299260935389802	0.153561055827432	0.338555611628926	0.00597358443687363
ACAA2	0.0815243918750092	0.376212031301954	0.466464003375648	-0.0378608412724494	0.164256297834302	0.24711346467651	0.0945210339479904	0.305426736696902	0.322284430147297	0.0860894730122696	-0.0448076781264575	0.813553050745257	0.931485806315939	-0.125268258470672	0.131325656510177	0.323813414276508	-0.0478067151473791	1.00762555799793	-0.643786859882196	-0.150133455584706	-0.00136045538583259	-0.0247844868708482	-0.15130874832994	-0.0248706819287993	-0.45688888340687	0.246145518835348	0.275774246994441	-0.189109246126564	0.288666485251046	-0.134602944812604	0.310637998013089	-0.923351587559677	-0.451641063862533	0.130761066267011	0.205432790365439	0.0998041151159894	0.618525249061758	0.0641466104817847	0.115728499106135	0.272326525950222	0.299392743462667	0.15149367913131	0.211061288715085	-0.305582871370895	0.271106468851834	0.568604404971535	-0.269315040812072	0.0157932521769901	-0.074696348822913
ACACA	-0.463828760183745	-0.435297670180919	-0.339027040707743	-0.159765580130113	-0.0702275042169116	-0.411247723127624	-0.311499150424314	-0.32173618045433	-0.368405841133498	-0.393098503623911	-0.432963176934158	0.261497291458124	-0.379156759908933	-0.259652057404012	-0.359037092257808	-0.377714656574471	-0.401285628733284	-0.389372797796689	-0.399275796508076	-0.316037052895599	-0.33981439405248	-0.215187339617099	-0.335864318747418	-0.235207249500964	-0.0109012933564532	-0.147199869096725	-0.0304372540025436	-0.215120684181522	-0.248398806073852	-0.0411179720643857	-0.427989319046194	-0.143868416610828	-0.101306410195533	-0.0952645631420051	-0.119174885784463	-0.112112825404084	-0.345457297997782	-0.19665154900554	-0.174931485369021	-0.361825585068358	-0.509120276869768	-0.0644693299947514	-0.294151863100404	-0.153628293826811	-0.00682688817070502	-0.144309833268075	-0.149129666848006	-0.03478039377697	-0.210094535850019
ACACB	0.0464983743338861	0.826607470498241	0.408134732342279	0.431985014449618	0.125536650636279	0.235654682788383	0.412697031311002	0.272225675636266	0.366050718609431	0.616510039853722	-0.302373577459424	-0.0200544036015756	1.05497521770975	-0.208506602579903	0.182431068974811	0.392822257072653	0.530072395217963	1.80930173669367	-0.294746544117832	0.143310959159343	0.322383007927642	0.152820792158191	0.120530918835671	0.426582311255156	-0.890342652248988	0.127128849633078	0.44704064420531	0.497069540492218	0.432410555067526	0.116849107251953	0.502975535158434	-1.77164203044197	0.285735009320638	-0.610920089867485	0.495172770522717	-0.446472465545093	0.44670007197952	0.463135856682621	0.370902713564853	0.277721956233321	0.37447514577654	0.195695592194817	1.40136795431765	0.653451275595676	0.237770480575968	0.286704595487007	-0.254336730134276	-0.498231186724275	0.3482163238822
ACAD10	-0.0265971497274668	0.133060988818922	-0.063810093597009	0.0173989663872046	0.107341219180703	0.17976984863529	0.0896307032920041	-0.0820743915326619	0.109045062566879	0.19165169951744	0.195457681215623	0.134910047046464	0.235819032138443	-0.0488399722819997	-0.191724460817775	0.167092452123466	-0.0258904132599841	0.210508196385059	0.41710750341557	-0.285117191709356	-0.0372735003329502	-0.0175151457048637	-0.107690664104561	0.117362268814836	0.351376308551503	0.289575214510709	0.134085497458184	-0.138752159473028	0.206979371826099	0.135442260419011	0.311746822242155	-0.131730169452086	0.0742813782995478	0.286443447452019	0.185279934565688	-0.245113185727154	-0.100285386588553	-0.279373908598582	0.228520026664973	0.198157731369166	0.335728890021079	0.20515714131647	0.320013455009853	0.25700282474604	0.318875434861229	0.208480988493642	0.00166624380948329	0.145262386311957	0.279609406465077
ACAD11	0.467809514637106	0.324843153464057	-0.0355596082775183	0.4286027105237	-0.0349420152249776	0.790788583150257	0.497653439420603	0.250178511250302	0.427483377907613	0.920535719405616	0.383731203680405	0.129961880544286	-0.0103539730880199	0.986500752034947	-0.664909706355472	-0.110921978644673	0.0536303142229702	0.728234783013889	-0.0351898157128458	-0.169369866436424	-0.134763746211445	0.164456772971443	-0.260721663183387	-0.040703125432525	-0.161863641300484	0.583505104221173	0.298889913963202	-0.00387633659054673	1.03203953728089	0.696487167279044	0.6011979056578	-0.582487516112577	-0.664240591336926	-0.249594292278204	0.709948187417453	0.801978687521952	0.44078161284105	0.109523375557282	-0.00568198040123455	0.367536641949149	0.399994338667963	0.782971282308435	0.955182869137145	0.367703042505392	-0.0059439416309511	0.520581997493642	0.37447514577654	0.432608251530393	0.276984894171985
ACAD8	-0.183869255729959	-0.27515515193712	0.00725510130344654	-0.203412866727307	-0.651261246103509	-0.209312156706728	-0.261708265741823	-1.47195793029785	0.0464983743338861	-0.381325608943845	-0.294935563328746	-0.204753857532653	-0.486347161282527	0.0801987298988174	0.264557964036175	-0.0773095198346165	-0.0429265234734801	-0.23355074935353	0.341375739947219	0.326801965580584	0.345728134914073	0.147076159825877	0.258264960100146	0.146803600583366	-0.286671000275337	-0.124701016079567	-0.677650220912002	0.236320986912789	-0.00257871491081869	0.345863672700307	0.0501452010169804	-0.192604895917676	0.395760058871228	0.040285605468148	-0.0782022429041091	-0.0753514155398994	-0.120510154199363	0.151175712233377	-0.00253665116209013	-0.222169371130348	-0.0789089332077492	0.200394458111073	-1.06756086971097	-0.558234549565661	-0.166242014528635	-0.329807759196918	0.0385356149687296	0.0382441552556474	0.217226747290968
ACAD9	-0.442163098502542	-0.432002877035355	-0.276346755460526	-0.422442051490424	-0.225724973910343	-0.222299980761744	-0.379658808584897	-0.395160765585427	-0.216709842101312	-0.222799399499065	-0.739839041450714	-0.256441183666549	0.0158017099555748	-0.563573617797578	-0.514572775971638	-0.298580000935692	-0.484058418293144	0.0413455658063859	-0.507408790411569	-0.31863930268894	-0.34916755641471	-0.165520764743133	-0.323561611977243	-0.454967563637329	-0.0703019545723215	-0.322541339746767	-0.239870415589059	-0.381978283468375	-0.205917422821871	-0.64666395347869	-0.379401832180512	-0.0669500509095999	-0.216241847427419	-0.171232370191255	-0.0852235154192742	-0.298201098747948	-0.281871012764301	-0.388962094753445	-0.184972899038942	-0.458038051122644	-0.263861653448944	-0.0662212237721945	0.0461060889867575	-0.0257516593752104	-0.239396380841418	0.0307290489603021	-0.304279826613612	-0.183015037436861	0.236320986912789
ACADL	-0.234255835655345	0.570461257662701	0.541436700032231	-0.276632963438651	0.924481156985279	0.815978465727198	-0.158546207109929	0.406839306911351	1.2355247666185	-0.512091729932054	-0.335647643884736	-0.410746756121632	0.428743810200099	-0.206699565891679	0.958616024753249	0.0709976475664674	-0.221065616074154	0.041422921067226	-0.33752820478946	-0.107549697465235	-0.0223389557109507	-7.01280732980248e-05	0.448300915199944	0.041314415720549	-0.789014412387183	-0.345714738502874	0.712541773907367	-0.250675838811806	-0.457930070150108	-0.331156722114011	0.684108716947288	-0.60466208981602	-0.625523360403492	-0.427989319046194	-0.36359763720825	-0.512950325382444	-0.198428620615484	0.357393296451328	0.168180675716983	0.163501165944842	0.35284090874343	-0.696989606548509	-0.602123541769347	-1.07190186620714	-0.59446193444445	0.0821044747899201	-0.550487628740951	-0.484782727256742	-0.591719254507729
ACADM	-0.314893683468086	0.0907464708562784	0.478316808705715	-0.450749977108702	0.0108982609622317	0.260249122358862	-0.31015560057454	-0.621502319498396	0.332699130032088	-0.129168810205932	-0.132292405940079	-0.0409674148201419	-0.0158690275659298	-0.289041397833566	0.125885779010022	0.550981113776937	0.314278830627895	-0.270504123004645	-0.124325359525817	-0.215187339617099	0.29206147984684	-0.168339190062576	-0.25946489313261	0.29809540416354	-0.00871257983406786	0.518847094533511	0.0473638600596349	-0.487749319617717	-0.01097493478319	-0.249086441886058	0.12416341545576	-1.27219738347111	-0.241220016430877	0.144494415828826	0.325217385218352	-0.0122011971015612	0.319334141665757	0.0259466825284362	0.108808209759153	-0.00561245598460803	-0.377945610525345	0.0792772257018712	-1.02829332370142	-0.343010916969062	0.0942381542411707	0.317438466505465	-0.0148947638040961	-0.0314885523814125	0.0914108417920143
ACADS	-0.0373251882125297	-0.204894683704366	0.0926588191957841	-0.0625940549641894	-0.0769008195587646	0.0375124533129622	-0.233427006111174	0.0513468961123516	-0.20583940755117	-0.142888932349479	-0.305900197416445	0.0407920669525534	1.19533470363685	-0.279933425872986	-0.323271497832139	0.00911332774087365	-0.201705654667697	1.08823542821604	-0.308850921957266	0.056281585915108	0.0104202375552729	0.0681301137710129	0.0284353539598348	0.140599369011281	-0.160938018081665	-0.402907543196196	0.0745271913705842	-0.188117458570327	0.229928262521082	-0.314740993096315	-0.127702768422926	-0.696709167530307	-0.370659028687371	-0.00470646930170775	0.1964135488251	-0.0671527925693505	0.155029748825169	0.297164848744367	-0.101218687447346	0.111780141722524	-0.0913311995778179	0.48561871206672	0.51907339677456	0.126182579200217	-0.21024786085309	-0.0741348803708292	-0.0831848860646081	-0.112167913594711	-0.446669014254973
ACADSB	-1.00560151285059	-0.067872119629953	0.34299377871964	-0.618393583049692	0.544954223378281	0.100160795389572	-0.712226711121069	-1.14931504633523	0.34611307834264	-0.189330530777852	-1.10290915612815	0.39217572585767	0.0979620519598167	-0.734911024741709	0.685849580342219	-0.04206845221971	-0.262624577460228	-0.214344177156975	0.0818973203971041	0.240433320257835	-0.172267460491196	-0.341280475718193	-0.0236020001394268	-0.0537835490331493	0.24580174056254	0.0127853461091927	0.342124076430931	-0.811849721026781	-0.0148393045510397	-0.698141850562797	-0.22680971756069	-1.49435306536478	0.213059128616079	0.0388995706563938	-0.0240879132443776	0.103686560398715	0.768048034311076	0.0631977676355282	-0.214788812857931	0.092819709549972	0.302733184673802	0.188828481841743	-1.33159478851147	-1.50711323108815	-0.0688105016869814	-0.25373940061338	-0.0710843119624919	0.296624243236918	-0.0482347299422375
ACADVL	0.422643252263869	0.723068703118866	0.320403766466929	0.553644364992035	-0.171111175260194	-0.133053449351817	0.560812809502752	0.752443437951824	0.147267354797388	-0.0259686334056145	-0.0939288021838629	0.331233478735285	0.797832378869515	0.0464983743338861	-0.342466834825592	0.122145263626567	0.41889903454652	1.42955672575984	0.170470184277596	0.368164461941516	0.703185700008973	0.60006240529215	0.440576041994651	0.524956063999834	-0.556921651661948	0.114444456789276	0.0512323413738614	0.665275347096856	0.57154230215581	0.252706791025633	0.525563696642686	-0.289859677330825	-0.56796557856647	-0.411210331637264	0.166392153736425	0.0840627837634172	0.271106468851834	0.566502651881924	-0.154228968633585	0.575312742702329	0.248897990931328	0.123936064246156	0.648020489523132	0.170422900493507	0.1418776515045	0.478309314083412	0.0896335037102077	-0.167736311266119	0.661965935590707
ACAN	-0.437872484189387	-0.373771027520063	-0.395033037915163	-0.00621457680302549	-0.644703856705887	-0.435769894986494	-0.694761757064744	-0.290008694272235	-0.592212774872956	-0.413377530291642	-0.266958735251042	-0.790326921953411	-0.00858811809501135	-0.43593389825586	-0.873190274801764	-0.493028190025697	-0.547435078310995	-0.439462021488754	-0.736364455861109	-0.596346193596347	-0.623968573790209	-0.494966575550355	-0.564814255587513	-0.431377681492881	-0.576865277661726	-0.663690601969363	-0.544315161155108	-0.437490157109915	-0.350290811740381	0.144329774499616	-0.460734127053778	-0.172060879100578	-0.562420357793511	-0.475012836244657	-0.396002073711937	-0.727844436501824	-0.440217667945998	-0.576011477211064	-0.528008854935966	-0.638211238422992	-0.450553675481043	-0.330733575423222	-0.0599265514715657	-0.421766876368206	-0.474776198536591	-0.284168373956368	-0.671255433816717	-0.526717362907177	-0.550982929339349
ACAP1	0.264860947926283	-0.107606109723726	-0.473112961113783	0.220823246030562	-0.134266290807729	-0.125818711898522	-0.0166831077192332	0.495118900196277	-0.04206845221971	0.0401642595316262	0.0222583115396471	0.0269970340173294	0.90569534066497	-0.346791741748022	-0.24683902334694	0.3046982742953	-0.227959142393996	0.707246958842079	-0.235340310686573	0.181650665348323	0.432608251530393	0.341449579620205	0.267774686622428	0.745854335368226	-0.162774807054879	-0.15130874832994	-0.145537778500685	0.303115950075774	-0.139185239431941	0.00750198244194774	-0.130082019317463	0.132041584440414	-0.309125698112319	0.513408883134961	-0.1681584329924	-0.273747048661898	-0.013771450926267	0.0588520103592662	0.14734177898764	0.0736246460177642	-0.106166964280805	-0.23642596842665	0.573744099599539	0.31692689257664	-0.00217015001004606	0.157671414353282	-0.307497274156221	-0.0661580005784716	-0.0775511727900274
ACAP2	-0.389372797796689	0.0814473062824399	-0.0262677083672059	-0.371961853509241	-0.333068370579695	0.359973479255035	0.0426046108475033	0.247626551716773	0.532274708944759	-0.10084795713699	0.550405303596721	-0.452157868830954	-0.361311090675594	-0.0866646520020065	-0.452157868830954	0.249179540640009	0.364782842598167	-0.17376384117364	-0.285815785719989	-0.421659419775621	-0.459175769722767	-0.384437041823034	-0.634353565061953	-0.311045539290976	-0.387722045666384	-0.059356169390533	-0.351179198082935	-0.353536669437467	0.237770480575968	-0.101537696820957	0.250590632474592	-0.519717105603562	-0.0782598640408614	-0.345622394963163	0.522966039459326	-0.114476029420755	0.220285593579328	-0.149199569751238	0.135172748507011	0.172936900206491	0.239833597987184	0.564653817048236	-0.292955902681529	-0.0328884812780685	0.168426624307758	-0.479274292187329	-0.26485903793741	-0.0202637281562124	-0.164266034995787
ACAP3	-0.050193938546984	-0.756408961088617	-0.128135925755454	0.0570447806926313	-0.0589093626393714	-0.180796712700338	0.330233698556677	-0.152159870927201	-0.380150496164621	-0.411761317613032	-0.178045703243124	-0.615032395381367	0.0123080464174599	-0.171308686371015	-0.0416288962271814	-0.181765484022511	-0.0443900566163952	0.425160389642102	0.242714328124135	0.352298408693527	0.682902529498976	0.383144211916832	0.271205511219551	0.421003819597171	0.140953358340446	-0.455316383464005	-0.0431593313119921	0.755075339100396	0.255247894447634	0.274971181610894	-0.242482409501738	-0.871552225844608	-0.180509799129973	0.330853049642267	-0.0715980854195813	-0.289924791398239	-1.95509516566773	0.484325110361362	-0.3380220845166	-0.0463652545949309	-0.305904929468794	-0.068517460177693	0.164069959071736	0.464444333317195	0.450110302018702	0.205239073016568	-0.167946980208196	-0.243865454554336	-0.170088465633796
ACAT1	0.222946175194605	-0.249498950508533	-0.243298666879289	-0.425228567230794	-0.240639311702055	-0.34777217740793	-0.353891483588942	-0.434833274198781	-0.125818711898522	-0.446824651914567	-0.363888040018512	-0.424316092640616	0.0549015787689446	0.0252633038797369	-0.421849746133977	-0.193371588711712	-0.371893536773586	-0.313901633779063	-0.565758271735789	-0.354530884992898	-0.517804941976584	-0.481549890120164	-0.482989452931377	-0.417472790821187	-0.609699803731091	-0.331156722114011	-0.231286597121815	-0.534226092786863	-0.111395562813939	-0.04985593449208	-0.259257656595101	-0.737080863893036	-0.482080049015304	-0.475962930442961	-0.37947269149232	-0.121434739556436	0.0081869401537474	-0.45342688813772	-0.0307316947772436	-0.183015037436861	-0.320617267695143	-0.393207132305288	0.330029687851295	0.100411620727305	-0.259526635357684	-0.106943768780682	-0.425220588356456	-0.293221234858129	-0.471730056395336
ACAT2	-0.694099600973452	-1.03179189320333	-0.0826050133246928	-0.31714467378356	-0.266665126385639	-0.0859636560690678	-0.283381453990128	-0.930154835143824	0.0788044453372727	-0.384799487860032	-0.453340107748921	0.783050555138739	-0.870926881989952	0.447690277102398	-0.334587162187809	-1.22785152594726	-0.25204163331147	-1.35090442059399	-0.800734306438928	0.904650383399058	0.0461060889867575	0.462952471111439	0.616122059932481	0.0958828636907228	0.294142950590913	0.0407092591299641	-0.304769135231104	-0.0418503571298887	-0.575044446227886	-0.657429406086981	0.0948213541691131	-0.203271815829725	-0.0736942719451615	0.264746315869283	-0.500145595290869	0.179433750999247	0.687685321030978	0.22882378016119	-0.185720069235103	-0.489621195470861	0.24121566696119	-0.0926064586500981	-1.11134540272626	-0.253955408743161	-0.406887696844934	-0.68075649894773	-0.132134424006456	0.443274301917035	-0.277952697179163
ACBD3	-0.977658052189918	0.0296893761860014	0.0057022268415913	-0.111277310425644	0.219394028306372	-0.0621866076162145	0.0260719605555984	0.447690277102398	0.0978565005728323	0.226919508284017	-0.202853979588473	-0.0845104725449674	0.180827293699894	-0.412253899026722	-0.197127681899029	0.0302364930722279	-0.143813587199312	0.32408662143313	-0.136138513961713	0.193282531114454	0.353405938692611	0.195031409627116	0.297785894021514	0.104166187953907	0.364454041055151	-0.0922602061712417	0.262769571022029	0.120117461826258	0.115980051736761	-0.438999921536333	0.0528124480423751	0.169944321660152	0.157862935346173	-0.310362741591576	-0.0421860851975574	-0.342669718273122	0.280443360022827	0.229735188917708	-0.254885298387892	-0.138473453271634	-0.106290496270609	0.159783000710481	-0.574932464148478	-0.627577819899342	0.0849356701299383	-0.321334311883284	0.0651857252420573	-0.0343176114045994	-0.139608044007063
ACBD4	-0.209614743842796	0.112238469473491	0.0142923779222923	-0.00483437708380306	0.0180002718172597	-0.540903382343129	-0.153019087313151	-0.289163539703343	-0.484623277905969	0.118650654191539	-0.664601951439711	-0.0016531429999129	0.671931688650687	-0.186260938045448	-0.832390361355489	0.00851020797159543	-0.175925286622845	0.624594066505628	-0.232036658443584	0.3788136446165	0.421627477360718	0.411866289488213	0.0107916837809801	0.106519286359644	-0.288312037361715	-0.782155891942466	0.152299968486115	0.306881009458009	0.192683944384977	-0.190293440068023	-0.354881593332865	-0.905985282502743	-1.02188998524888	-0.0169559817093751	-0.0723494172410049	-0.722501795510853	-0.647817322547387	0.341979579171862	-0.595921545458826	0.197396117208676	-0.277011539818035	-0.892462081009031	0.45549239989157	0.314012735272481	0.0803517625424121	0.0125175121320186	-0.74876854777293	-0.501436315478993	-0.148966777547316
ACBD5	-0.15729918410124	0.21708123112123	0.211679679027296	0.322109326370267	-0.150556428115242	0.129714832254383	0.162033710235643	-0.0645815744395761	0.435876443234945	0.121784694888132	0.300513855570582	-0.304420190192208	0.0915424518483121	0.298821533502712	-0.465043153048639	0.377568296336011	0.293985742231865	0.18729716449605	-0.48367541538616	-0.683470754782306	-0.577329379830038	-0.905838532708078	-0.838739608633929	-1.00974547669243	-0.282810590984849	0.379803671861678	-0.0310917921317037	-0.61736607261083	0.134898168749889	0.175403839897687	0.335020683619265	-0.783370621157104	-0.290934070721492	-0.231127954610136	0.218812078262285	0.176144927189755	0.304817373921466	-0.40231524332411	0.10479823672426	-0.123710562946448	0.0808119816985421	0.414501340867535	0.0541912750596205	0.0940747527352532	0.142073344158854	0.104068342127532	0.328762681647088	0.31106773940537	-0.285055159443809
ACBD6	-0.379901267115504	-0.4901488526465	-0.0738262784044793	-0.274052793893735	-0.0880017613329577	-0.058079250937045	-0.409472582508458	-0.802072269848393	-0.115309783858738	-0.760708059938754	-0.856241907963087	0.466834504232793	-0.206492388894739	-0.328610025659413	0.0582491720233429	-0.447746109001011	0.0345194788295988	-0.394910919675111	-0.42055273207132	0.598642389730362	-0.0661580005784716	0.346735550988543	0.509644475108652	0.300209002810593	0.0702836775634925	-0.303901214804074	-0.0264718785724343	0.121086685219697	-0.0958486984148424	-0.402566852989497	-0.0478878868516472	0.529326051710228	0.12609030899133	-0.408635542366547	-0.0972657468475767	0.0346775724088156	0.0771344979179492	0.413548757819205	-0.174366815758601	-0.0896921116606363	0.105444559286279	0.0378797874606501	-0.722203810909389	-0.161306074884881	-0.271481464184258	-0.531627915772266	0.0538100550119359	0.455286428298858	-0.359251152932133
ACCS	-0.505713736097839	0.828793409093652	1.54260044221088	0.0726987599041164	1.48711033274149	0.212049925941003	0.0542985745218812	0.0247384186361981	1.34837802352838	0.54887189226447	-0.482255232688814	1.12459629373401	0.725153521277908	-0.15274981803386	1.1670248132463	0.0649022387028603	0.649314713068298	1.90330417408204	0.897184835434072	0.675589458362201	0.667300552692411	0.32473302189713	0.261131094747531	0.771526699374558	-0.0991142310304883	0.886876860876861	1.54508983523162	0.953412743905655	0.0415861346670281	-0.208134349246674	0.496068998683659	-0.42689982400661	-0.11386166357482	0.519420360797099	0.804348690835771	0.0164510699459341	0.152820792158191	1.29786033942074	1.12715817589754	0.342845843357562	0.215166934840847	0.0454612066623008	0.767683170493105	1.4582541213178	0.302346313006713	0.550603287062798	-0.0887427120931623	0.163592683477401	0.457417898551665
ACD	-0.476937454930682	-0.311969815299003	-0.0717697367552976	-0.315754786068228	-0.657772649168913	-0.104421201188217	-0.322324771706562	-0.0176533890976171	-0.14024032492607	-0.244160523708054	-0.652552846837935	0.227563828132186	-0.0791509177361011	-0.247340744036874	-0.341091271931905	-0.771974933416955	-0.34888918545478	-0.19707708752744	-0.654342457714937	0.285613897831683	0.238956322654674	0.318196937880442	1.04573431673263	0.0580456513397816	-0.284508832562131	-0.133741740316926	-0.593090866137558	0.456154847224301	0.115824383375178	0.148908660897129	-0.196919874149428	0.0603227053530711	-0.340950737797813	-0.314203471778211	-0.315379182728558	0.135340574235371	-0.526187604081352	0.321264506102392	0.221016286113086	-0.331968050400468	-0.242332748427958	-0.122976127680575	-0.0537835490331493	-0.110162810447733	-0.182473049366276	-0.668988844836805	0.143805578375645	-0.233709678726651	-0.521731734176011
ACE	-1.15029818731163	-1.09672440487981	-1.11066266191811	-1.15560454110851	-1.30205375325104	-0.968532788304471	-1.13224596787369	-0.742077278392636	-1.12503962748643	-1.11489355834528	-1.09842510901048	-1.20037341209266	-0.256069991804979	-1.05159300463193	-1.28639052124511	-1.1915830466232	-1.2641183933941	-1.04386737141484	-1.25993155072234	-0.742419738058368	-0.772277915212018	-0.716797847555012	-0.621259730846276	-0.750502198649995	-1.34646204902263	-1.39970245399215	-1.4121894672858	-0.739741357700374	-1.19896754873822	-1.13422506427341	-1.29665303760952	-1.14274237446858	-1.40250505639032	-1.28302706903782	-1.30077508396812	-1.46952852184931	-1.30591974607715	-0.667008907067191	-1.34864257589524	-1.08453524336286	-1.26658328301187	-1.1726395915577	-0.20146159701812	-0.351605786145416	-1.32756523680457	-1.17427874280912	-1.34050539365496	-1.28435252214046	-1.35731157136871
ACE2	-1.03420475435025	-0.768806251023758	-0.906800393052273	-1.08651987213919	-1.04271264993214	-0.903961674110332	-0.933502428497616	-0.589256739865862	-0.871982382842131	-0.833639290441016	-0.809249156322922	-1.09030145098781	-0.91342912382766	-0.807415526472816	-1.07160324541807	-0.958500468562201	-0.983258731419465	-0.982009125876441	-0.998348444324126	-1.37843566371138	-1.37728091877354	-1.40430272576253	-1.36103927969856	-1.36536549196764	-1.14574891931289	-1.11958369116883	-1.15353622687315	-1.3763437841713	-1.01018252235102	-0.824078211037186	-1.03474808712755	-0.974925471056392	-1.09775384644907	-1.08984471355945	-1.07914053606744	-1.13249672720859	-1.03991019064798	-1.37801395478391	-1.11024346930847	-1.10624281678026	-0.919835199186998	-0.926697463230208	-0.769184374192752	-1.23300560303666	-1.1549316282052	-1.01178114208477	-1.07980735536547	-1.11423482400453	-1.07286293746643
ACER1	-0.658746238750449	-0.719798760050234	-0.721654095543828	-0.707647331874791	-0.891883003842279	-0.55938797231487	-0.819541120095738	-0.482016547438159	-0.757836312059531	-0.578043142864924	-0.245013435008371	-0.903397795083461	-0.434659928842938	0.486464155926423	-0.981780678338716	-0.60854169144396	-0.874138502500347	-0.602507192710588	-0.947814220406693	-0.677376295229848	-0.716797847555012	-1.00728922212413	-0.698890068266387	-0.409086873943692	-0.979645604793107	-0.975269712806432	-0.990904302369256	-0.682710977945193	-0.810910801518376	-0.265624477184861	-0.936852605207591	-0.833663806409719	-1.10350231462918	-0.990548566063725	-0.54991079778223	-0.0774827396662549	-0.410976838817568	-0.377854424913645	-0.966536899722291	-0.904497003123348	-0.977346004488587	-0.820127318227008	-0.859477674514925	-1.30499918926728	-1.0100529358294	-0.878655976711804	-0.803735248797648	-0.978959320568242	-1.18657914675699
ACER3	-0.000785008622582659	0.231321831191078	0.0878375721661825	0.718938820080802	0.343503711427765	0.471779816599918	0.561141486276159	-0.554049439024698	0.407624317618806	0.50917066405118	0.660725422604023	-0.037253568681991	-0.57244552019137	0.783050555138739	-0.240316231586882	0.137907005993527	0.116243699710395	0.439375533504293	-0.0189393173250662	0.0826805622924089	0.10748849443681	-0.0927327634706581	-0.263775186857571	-0.112543609501075	0.697215277988752	0.739627334730656	0.373808571918713	-0.405378951522922	0.619621820257927	0.41338260203655	0.685560583143656	-0.630555136622274	-0.208507888865473	1.03331686849587	1.07005609474689	0.919106509753652	0.19650686443439	0.0315971585164724	0.623177114071773	-0.177303031389334	0.0996646471646608	0.979985250794349	0.240433320257835	0.857430958871635	1.10485935453982	0.726668163045816	1.03990544514133	1.21741648886314	0.510252177205474
ACHE	-0.634038536221534	-1.13900614592819	-0.87926674299418	-0.563421228360902	-0.693753715175457	-0.986045054775568	-0.445844497020284	-0.212941782733455	-1.31353966674822	-1.38003083770737	-0.528321278847995	-0.313038622255842	-0.773994505738943	-1.07201047945881	-0.00713564522364576	-0.542318616192393	-0.737782827725899	-0.754108942735725	-0.141563715365245	0.189778380022846	-0.06287623729772	0.00857057912594164	0.260141745444814	-0.132687205718986	0.459713238272671	-0.346729590715152	-0.778468075297605	0.331121921224996	-1.30839109382924	-0.212593736375463	-0.643462254174685	-0.185294024808635	0.00265468377938081	-0.643462254174685	-0.755829567845986	-0.91372809238278	-0.0919670729282392	-0.357464727454693	-0.2911061643354	-0.256177847233358	-0.54480031608314	-0.88953445403046	-0.744777322442289	0.063471746345975	-0.427803989122084	-0.753521394733158	0.397940907463057	-0.489809950695409	-0.0874749572496353
ACIN1	0.293112805416683	0.114784347151499	-0.220494005858211	0.154388429248376	-0.154969229076157	0.0262917943260493	0.308910403188415	-0.0327913236264441	0.119828391073675	-0.116223091588771	0.240913623512714	0.169780627881337	0.00668783845371643	0.185318867195259	-0.243807457708451	0.0361083121437197	0.0257415635547142	0.677799378239037	0.0331317419850036	-0.159293988886864	0.324849382713469	0.299923863799419	0.072476123105043	0.186723568244566	-0.414191055258019	-0.171157677386606	-0.00747913911938796	0.458938653938209	0.159167602455098	0.633499012600225	0.0488841147679212	0.106519286359644	0.0347427587664861	0.0933115730859125	0.152025040964762	0.149086625108789	-0.23923534618834	0.128522780299607	0.455976847430036	-0.0211177384642127	-0.282043084696268	0.230304912197909	0.147767876482858	-0.204939628994226	0.423030007479708	0.128841607335163	0.00750198244194774	-0.0214197957732175	0.382014344359761
ACKR1	-0.125363438865513	0.0464983743338861	-1.48284497441816	-0.503946416623245	-1.37843494110486	0.801990416728794	-0.181536254509995	0.772844694787016	-1.5749600758109	-0.016630214591536	-0.450703231271679	0.00215008153605661	0.675775024013283	0.534057405369926	-0.373135025220466	-0.819168941809302	0.671931688650687	-0.56641064855588	-0.0590443954974468	-0.06050035529305	0.193563655450924	0.396910870035387	0.101483686051118	-0.222169371130348	-1.54550650510963	0.0944814556869562	-1.38911505366084	0.660814676042567	0.244225322759013	-0.165993644509524	-0.0908185212892384	0.100701919876012	-0.780953378080574	-0.478180683575064	-0.602775278457787	-1.12572303333698	-0.721660631967498	-0.156284283014247	0.500743002841132	0.186376483567996	-0.810793270333366	-0.907783028866401	-0.0251912591572046	0.418903217151641	-2.93485634359913	-0.645838041373027	-1.13201796131567	-1.48123910701789	1.16097576500372
ACKR2	-0.822173031127973	-0.882535887421592	-0.82145546363895	-0.890530600255233	-1.03748687906715	-0.73837665246161	-0.959550472272823	-0.633737448614988	-0.874284326179024	-0.881748324886535	-0.869583606341983	-1.06545830177598	-0.833529276870072	-0.711767647342384	-1.03835208228751	-0.982244115744808	-0.967954963268056	-0.849592384315667	-1.06718279394588	-1.27843807008604	-1.24407137579839	-1.18622942452639	-1.25902245284488	-1.29198832267758	-1.1855972009298	-1.1243435938385	-1.14804289702387	-1.26521181449536	-1.0098773067464	-0.902255146009702	-0.889004222421357	-1.03178741646199	-1.13123941493434	-1.19062297535401	-1.09599820271849	-0.881217977339223	-0.764473119562373	-1.29959015485987	-1.06774491974109	-1.14859204466921	-1.05168040362207	-0.648756829785831	-0.629908987514322	-0.83512445818063	-1.20104095613041	-0.882217458019884	-1.05095986329968	-1.1454431274136	-1.13868097043865
ACKR3	0.742351485677134	0.893764476182688	0.728234783013889	0.318234154905391	0.759826833686798	0.83428526268756	0.339315782454543	0.431801377326143	0.611952906226413	-0.262353005974611	0.338195156302879	0.581621430703663	0.806249244046157	0.636516331745719	0.406839306911351	0.615882621854784	1.00000926618236	0.506985177068675	0.492600107765281	0.0043280848474606	0.309990992804746	0.501010381489302	0.776022141557582	0.191790324000306	-0.584303548643182	0.436300241303541	0.803844666750837	-0.0240879132443776	1.06922539222758	-0.0658222084590595	1.01166593448299	-0.558842242099986	-0.125689485517946	-0.0313462910680825	0.499100068594059	-0.670433656970148	0.260025952997093	0.58922927816619	-0.0974856082890938	0.814565034711682	0.48774852560373	-0.0919670729282392	0.333695182895079	0.281660737476055	-0.337660609175692	0.135719810318067	-0.110020135759832	-0.216478007221546	0.294142950590913
ACKR4	0.651663388220807	0.359859030615333	0.53028044192792	0.336424778750666	0.683769917812017	0.868239000392455	0.168766434161095	0.36288708680376	0.54732964164878	0.376212031301954	0.736326128271033	0.372876360462592	0.317298578068053	0.183639287029992	0.508895809294168	0.338042117271567	0.166666249907909	0.202758546988942	0.732562060348769	-0.687504890663722	-0.130082019317463	-0.405783569559479	-0.50864156379721	0.305322088038429	0.525399191676397	0.386072962569558	0.60785670606227	-0.527033631753671	0.120988866635136	0.323732814281967	0.411049756257515	0.127034694339437	0.538291382850365	0.49631510871728	0.30837424666415	0.297009983700852	0.160136735302545	-0.683951266757793	0.259901415830756	0.453723500556236	0.246904758012909	0.103526167321082	0.429687776485567	-1.01371955731487	0.473328480849611	0.293416526044844	0.0487630287584416	0.32420190416567	0.39071732494196
ACLY	-0.464781638510889	-0.32284532425087	-0.560725830110047	-0.581651687249569	-0.660517126672505	-0.155272096633978	-0.34343184353441	-0.758986409863985	-0.100481780686615	-1.0203845711026	-0.757662807328708	0.455281599029908	-0.564842523500852	-0.309255366442934	0.117078709464537	-0.309255366442934	-0.278087143099315	-0.685540438035372	-0.151514094006992	0.085625953841729	-0.224149847407102	-0.103555638898504	0.00863656681962429	-0.357945153995959	-0.0903600497229405	-0.115971182035757	-0.72810553203935	-0.108839938487447	-0.601475547041258	-1.25442341241356	-0.0403422028656699	0.489672743889103	0.538542488858078	-0.324738278328123	-0.170926052228196	-0.385121903252228	0.18023742964132	-0.180663976829795	-0.0158503307040063	0.121591460979986	0.203867502191616	-0.00697151612383266	-0.902897784864154	0.00306147351572855	-0.113386055943632	-0.434751249120194	0.425518775990639	0.305654797834433	-0.202736998977705
ACMSD	-0.0209001920625504	-0.0282032021806897	-0.306746810845991	0.069659626228615	0.142431802582718	-0.15185409337121	-0.081420019999551	0.0183397239231461	-0.122577401565844	0.0276378041845134	-0.0087187803461394	-0.0940114479077489	-0.12551216048208	-0.0615057781854542	-0.0566033780684473	0.0120168281720548	-0.12493364148888	-0.185711683084522	-0.0605799762439871	-0.578951623527635	-0.647717533856031	-0.606974941009361	-0.609575521732363	-0.530379039216627	-0.0643258747891302	-0.0140988563374809	0.0686453866853159	-0.56796557856647	-0.178581887421505	-0.0316899515411009	-0.277713254687019	-0.0560217658036451	0.0439201688720986	0.0958828636907228	-0.0497051360846022	-0.0644693299947514	-0.0998758730988881	-0.649138151547299	-0.0536279091602934	-0.06287623729772	-0.0692069560585278	-0.0832584329296253	-0.469388283513534	-0.71323807710739	0.0379693282239708	-0.0399798587837953	-0.191525574809745	-0.0814674218514857	-0.0359591523219231
ACO1	-0.669001362735068	-0.33998266255165	-0.0994591309015294	-0.664801093276918	-0.622172333211246	-0.389305792410914	1.32161810185988	-0.501049285321687	-0.353797462628827	-0.505876764172551	-0.523012117616762	2.57138629729761	-0.284313421481353	-0.479353926598935	1.14566112330358	-0.481434002345339	-0.423905039471726	-0.58035602043379	-0.642638824364429	-0.638025189076076	-0.409876989340945	-0.679001491919134	-0.640329896806625	-0.575741929798977	-0.736804254066244	-0.476152152618115	-0.582733945072142	-0.60247011287468	1.47965793028991	-0.842442920592491	-0.356367300537035	-0.490355894331465	-0.156964921346299	1.67011513915933	-0.316963735532226	1.1579851987291	1.63491535189106	0.942061357485395	-0.135082879700043	-0.563282597109012	-0.235063565274006	-0.311258148162626	-0.281377141317242	-0.0183250262941109	-0.820497169344175	-0.341868978385589	-0.561496372489846	-0.794434861815645	-0.367074101788806
ACO2	-0.440330865557399	-0.204163234465046	0.160084959768605	-0.475506266522858	0.1635020020697	-0.316238083751942	-0.457717070061594	-0.402223559638401	0.115885002743745	-0.256943786960635	-0.355694773662411	0.362079738599564	0.229757610684508	-0.377494740463584	0.347877235834928	0.122379975066211	-0.280961605264807	-0.21016729139579	0.144041900652748	-0.00129784626315195	-0.0398307889327586	-0.0384681577362358	-0.0751549679314971	-0.0440898369837006	-0.071880046663704	-0.0557593819633308	0.0491139550997381	-0.159789183753137	0.0605443898219503	-0.341510748536694	-0.136661376411243	-0.0693386098273227	-0.107868148710245	-0.125495249565393	-0.03478039377697	0.0232670242176458	0.0668937244693425	-0.0542226560449257	-0.117182189782402	0.0279887661331898	0.0512323413738614	-0.117917884587488	-0.829579148840491	-0.752911363879325	-0.00901669243944016	-0.0847183841649134	-0.0930257021583304	-0.113726288838129	-0.0361760853745798
ACOD1	-1.27994431224533	-1.04792139644571	-1.14541824051269	-1.2356605869714	-1.27017249798668	-0.942348303057439	-1.16068334948673	-0.961924384070233	-1.06972288764902	-1.12434621652587	-1.0702907151018	-1.2913835971285	-1.15204615626829	-1.02647156262914	-1.27875649265056	-0.647065783622886	-1.21221395859869	-1.18541497623226	-1.24347222885342	-1.64291500997861	-1.63032207084488	-1.64678821249085	-1.64471439625044	-1.6417994741697	-1.37064242368456	-1.18648091734668	-1.38134317784859	-1.64100536859159	-1.25231737161372	-1.13760768420471	-1.2714931444774	-1.241971524223	-1.36913232590523	-1.38474648105059	-1.31130626323856	-1.36652358647823	-1.29026955799505	-1.66129765510504	-1.35133352189822	-1.32055183896212	-1.34172848925305	-1.26682588830238	-1.05603768347839	-1.28280721944166	-1.15897085391519	-1.26773062534908	-1.30047032912703	-1.34479928637332	-1.37728091877354
ACOT11	-0.104879726367331	0.177406943995936	0.195943342548385	-0.205601353857724	0.256632174501162	-0.0489005456831998	0.3553920441866	0.261757060860763	0.0307861056137012	-0.252243848846394	-0.369813460140337	-0.176987189552088	0.24198129517748	-0.0992572691248055	0.214970279436727	0.3456533157879	0.390387931089333	-0.031176648634925	-0.243646939022073	-0.342490746539613	-0.087691894369829	-0.151262808790247	-0.344763891103173	0.247956155071814	-0.135429566113627	0.198157731369166	0.254063837912916	-0.456699630093554	-0.0295046680192741	-0.467353532875072	0.00993464542444344	-1.04832082153763	0.325473734144775	0.00928204998802979	0.248083479244114	-0.356727790918674	-0.0332558260805877	-0.232650139908297	-0.308695601410579	0.0623708763354957	-0.468656455394596	-0.473541009469153	0.0487630287584416	0.397410850307036	-0.0539606485594922	0.387012557027479	-0.641376504613276	-0.157606279153243	0.144163672065144
ACOT12	-0.370562772282298	-0.313273343017352	-0.452758503350449	-0.538556538870231	-0.308699052353948	-0.374794190855102	-0.379827998432195	-0.0667460679589816	-0.329220421112966	-0.223542130188693	-0.287507661358924	-0.530478067342103	-0.379323265858165	-0.360840896719911	-0.516312527699086	-0.357008757975191	-0.463828760183745	-0.459541222524005	-0.570377004453855	-0.972104798832628	-0.948924783666161	-0.933610521731527	-0.892642499138056	-0.920535831832814	-0.127328423167351	-0.479658136613736	-0.375402714559208	-0.918755255146505	-0.396638473605365	-0.246981163493185	-0.507425957681296	-0.397917891720628	-0.382790580433208	-0.349087718321797	-0.441217764339296	-0.441461148308274	-0.40898906542464	-0.948722645766788	-0.472364833927851	-0.521031094781724	-0.632221347434942	-0.451180930175621	0.105058240215736	-0.108281467180651	-0.465263870421219	-0.472228345670715	-0.688598484453258	-0.478613010278598	-0.52870251614051
ACOT13	-0.0889187527465981	0.175840152471265	-0.0514431791503979	0.000218953028581059	-0.504948981147798	-0.341543743518132	0.138131658600872	-0.856388632817939	-0.132292405940079	-0.101116744971511	-0.200324695640943	-0.372160485253655	0.0885003754866931	-0.131296304766626	-0.472493971620366	-0.210515067037841	-0.669113063138091	-0.0753922105692603	0.0506319612956001	0.00762895359880351	0.47868192188145	0.336494502636162	-0.179019644219546	0.227438869035863	-0.348949703944395	-0.105757705836551	-0.346820644747319	0.0927237939140022	0.00762895359880351	-0.0785844959876967	0.0936234641292734	-0.0438846638052314	-0.57555717307296	-0.156964921346299	-0.0129747524065603	0.632936649992681	0.325473734144775	0.129115543053579	-0.153193711184962	-0.649956645206905	0.0137472788256461	0.0366084250523387	-0.00149756659072487	0.00127127509217894	0.312538104130092	-0.232976606909446	0.610133559464589	-0.538711030184866	0.154606667835897
ACOT2	-0.873032009702698	-0.702460220225851	0.545349426982979	-1.67858850749406	-0.297566135241365	-0.730589694530768	-1.41485092150664	-1.57386461245599	0.304207615525869	-0.831474306550003	-1.50877218268754	0.723068703118866	-0.153330735047648	-1.38209399405546	-0.434015873892816	-0.374855541932342	0.0767484345333687	-0.542859277212109	-0.479882733866478	0.51907339677456	0.294031184975189	0.223883377623272	0.304817373921466	-0.0883578898010808	-0.379401832180512	-0.00991510199826444	-0.332483371478703	-0.16844976064928	-0.782041966031666	-1.65026414608116	-0.298657667133401	0.186981274347635	-0.074696348822913	-0.0923210996478736	-1.06756086971097	-0.0835444173264939	0.151360882901177	0.437780577604671	-1.12594375638646	0.710416676733071	-1.38017499685486	-0.869338499388313	-1.19384127595411	-0.294553903698673	-0.762785841645506	-1.15424100600714	-0.90820138010658	-0.468262630486463	-0.884196515972393
ACOT4	-2.36545758894723	-1.61449279870437	-0.89630864172163	-1.10767888896582	-0.847224619645084	-1.23884939845119	-1.5063707978901	-1.08651987213919	-0.881748324886535	-0.82145546363895	-2.02891287303706	-0.586768305668764	0.231236133306486	-1.64587716702331	-0.46005303392268	-0.99553463250553	-1.61257413760251	-0.645917555184549	-1.04954473787485	0.0897473437840576	-0.552163129082713	-0.448746749643368	0.00238746984505473	-0.503050927668583	-1.21567812205823	-1.30990209442362	-1.10208364656259	-0.526717362907177	-1.36287668655957	-1.9073403067005	-1.3827081930068	0.275447208244502	-1.35227860926142	-1.12657355646854	-1.25985506689494	-0.42681091859179	-0.614021362740579	-0.563704566991332	-1.11579828974346	-1.41633487558908	-1.27992232228702	-1.59224211989339	-1.99207691162348	-2.5537365054117	-1.51222154134762	-1.22167913932553	-1.74568219529052	-0.339891171541405	-1.30353336781995
ACOT6	-1.10046057642813	-0.935924261907003	-1.03534926785198	-1.12915391787317	-1.12011890294578	-0.96959588480813	-1.04413354624267	-0.831602736144338	-0.994191467184146	-0.970586773946617	-0.941728394501769	-1.20055798480708	-0.172825791005636	-0.918991922560042	-1.18551022617853	-1.07923401763141	-1.08039766822223	-1.0054206539111	-1.15607061508324	-1.40530108335722	-1.38448591580959	-1.39853705021628	-1.40053306768331	-1.39152863243776	-1.17518069852498	-1.25601259634754	-1.23276542513542	-1.39449910499556	-1.16552417666691	-0.973951091673674	-1.1823315770718	-1.10865688832086	-1.24366952778449	-1.2207094032251	-1.20156523746583	-1.27975798777451	-0.887339584307571	-1.39895175115771	-1.22697389590219	-1.20401447469423	-1.22974459515276	-1.0390587911153	-0.938587191120538	-1.34209248109638	-1.25141378926768	-1.14466654265358	-1.20185417350349	-1.22815881468411	-1.24113061344175
ACOT7	-0.921780424493873	-2.11976677931695	-1.95320609805541	-1.50530289884408	-0.852960405572075	-1.64780227316353	-1.75484401419416	-1.61051953228136	-1.5055510170821	-2.29649920737776	-2.11758920006554	0.385359904231082	-1.82296525749413	-1.52818381778842	0.57480059272867	-1.56705102096317	-1.41740199804644	-2.11080785210561	0.14370582796628	0.00728524685165372	-0.471470284831925	-0.126215898808511	0.0934489180111472	-0.431828684334713	0.642691466466441	-0.645597547571097	-1.05676947712414	-0.119903686129429	-1.76397714029126	-1.20104095613041	-1.47791560076827	0.58977289851848	0.620800003345306	-0.611914791858428	-1.47567526087737	-0.167736311266119	-0.632638427510675	-0.632746739738315	-0.168080773637853	-0.266251103538518	-0.826109678375709	-0.918446902659616	-1.66374288383677	-0.446768294913893	-0.489298537332222	-1.79937706237894	0.960340168964465	0.216894249333584	0.0718721953335439
ACOT8	-0.110588752815553	-0.341197024602486	-0.826252512789563	-0.519069639430626	0.105538145510639	-0.6090183631402	-0.457281944953122	-1.30056998242134	-0.419551431961296	-0.387635123984111	-0.543643409105757	0.364118033862413	-0.277597090694	-0.490358148134125	0.399731509199287	-0.461074593186261	-0.485622620775193	-0.503824619097577	0.0381502759697546	0.166588509841515	0.044667955924933	0.0129231631613736	-0.0188106111583815	-0.14284203247223	0.172104752569907	-0.389437250558019	-0.0188106111583815	0.162342894573211	-0.329629990324581	-0.586233180865834	-0.57555717307296	0.0397982053870193	0.234079174706373	-0.203957228925144	-0.590997415724981	-0.562102759355508	0.0225151839185828	0.00980064154802548	-0.251064754173724	-0.381895765671315	0.0944049139862935	-0.290934070721492	-1.05026549442794	0.0373056716643463	0.0271897016618985	-0.621605542340326	-0.117278702104263	-0.0608814811781229	-0.377691226676925
ACOT9	-0.534519340312182	0.308753406362303	0.0332577887365843	-0.501324771881801	0.141271003841214	-0.203210348052198	-0.329376742757871	-0.134317188586725	-0.227959142393996	0.300115691233789	-0.476853777091295	0.837161248358984	0.230488443441952	-0.623978837323072	0.24198129517748	0.0673309070464618	0.120058806057941	-0.194964285424807	0.355223713736902	0.227719942357925	0.111951730913342	0.0578027738411704	0.200309735725113	0.126013571466685	-0.0165497899499111	0.179922657072724	0.161622580087936	-0.0138314834703788	-0.128155420950391	-1.35190361523799	0.0161835131807573	-0.173379339262407	-0.00517690579945588	-0.457628412051589	-0.220707240746296	-0.275417142184389	0.265080579867925	0.107735811986889	-0.536860604743814	0.0676423717136422	0.182006495268259	-1.31253349359017	-0.00456423765194396	0.736053347657051	-0.423007215621245	-0.0832584329296253	-0.241946512198282	-0.34285676618437	-0.0159323750196058
ACOX1	-0.250848732660863	-0.106756482663881	-0.0140561509688543	-0.38160459223159	-0.374240404998627	-0.203412866727307	-0.328237351494297	-0.135705860822164	-0.194397356936349	-0.508189872461935	-0.427213184648004	-0.565441878581402	0.313592326988016	-0.480921133693917	-0.612945400531472	-0.0899526815636948	-0.386464770944301	-0.132973906155558	-0.563421228360902	-0.528206059113545	-0.46126072840217	-0.501239721278306	-0.555804247908458	-0.548355157724527	-0.496254540789617	-0.0917664725215871	-0.331701373986234	-0.458265684479763	-0.193237268669552	-0.387383390821189	-0.186846404782232	0.08741783462086	-0.419240852230464	-0.666127888897746	-0.219259962058547	-0.511100807935454	0.234954375952485	-0.437573746694925	-0.169103218739465	-0.612485653729807	-0.102125190894353	-0.249913492864717	-0.0232175038666897	-0.337349763764889	-0.622382669682132	-0.340547185002278	-0.61509990873453	-0.686973163586189	-0.604556308613357
ACOX2	0.378359528616614	0.266810652000066	1.55033354886494	0.716511699693301	-0.0703655947247993	0.096183847365796	0.5269450548592	0.0395598365880645	0.951761628586787	-0.309913056681411	-0.0716404340725083	0.150888010215655	1.57788102074758	-0.0432134667837037	0.0360373656577589	0.154975185079031	0.472141591996829	0.298821533502712	0.279110728937814	1.05446469790553	1.49562958269819	1.12429461648204	1.14986083166331	1.38465105525356	0.328762681647088	0.270633102061883	0.207405038134334	0.809605367715474	0.433304608896074	0.182111122361909	0.67179471637455	-1.40554839690998	-0.249329384823457	-1.37178679314418	0.252343616653306	-0.122453973844265	0.124680573496362	0.955182869137145	-0.194347956893306	0.608902813501338	0.223069064859546	-0.205564983782497	0.643679915709605	0.961846119025087	0.377333807081528	1.67011513915933	-0.365919676948831	-0.427723874980879	0.0777013379212042
ACOX3	-0.0708601270346256	-0.131143078579638	0.493644182617762	-0.176144765908408	-0.251242936333316	-0.0366425735599606	-0.858871256233916	-0.237845114752488	-0.131792925430801	-0.310866919412881	-0.999998733964137	0.649314713068298	0.0699642886497454	-0.202664594104524	-0.532422096587065	-0.710306655645216	0.0270706545092663	0.11659882874038	-0.22686490769649	0.875113335067352	0.594530985328573	0.899992315771308	0.712541773907367	0.555248176040561	0.239621303442979	0.160629082003593	-0.164613930280615	0.674315719348744	-0.00141469024460248	-0.233284512963417	-0.111191092008621	0.499912454303425	-0.606615415248185	0.135172748507011	-0.629643072654988	-0.388389612156728	0.293213489232912	1.07310014543641	-0.532784885258084	-0.0883006804469954	-0.141021940276252	0.345000401336061	0.956555812213034	1.41983554866135	0.191790324000306	0.131735104827208	-0.109255638759242	-0.202736998977705	-0.0622591431183535
ACOXL	-0.285225728316727	-0.0663413801869168	-0.324842078422692	-0.340295210517566	-0.163717416926709	-0.232583630278094	-0.237624925342951	-0.0780263812620294	-0.271767733438323	0.0859497511325348	-0.12443931486837	-0.24609998990666	-0.212567196874233	-0.187019033916096	0.0795642984016523	0.167848745215228	-0.384920740858362	-0.0131232771001962	-0.286534646211144	-0.990273125190902	-0.807419604590536	-0.706062630114608	-0.766671771551371	-0.679774395983483	-0.144795459732968	-0.23142573542035	-0.379401832180512	-0.707489905837365	-0.358944367336105	-0.22653241939907	-0.380248155213558	-0.203140011776264	-0.15001929411931	0.201650050803054	-0.346426909205574	-0.411128348024566	-0.395094254025223	-0.71323807710739	-0.412441546260162	-0.333654774777148	-0.395728720064131	-0.390963288024779	0.464873833639653	0.457417898551665	-0.399972768694833	-0.204105849782413	-0.547435279346985	-0.384701731535246	-0.445143280223964
ACP1	-0.64966267140113	-0.824243479560663	-0.214302008367224	-0.579665577769846	-0.590814110593284	-0.238062481431357	-0.538593908506134	-0.734434626567875	-0.121586485876217	-1.07553919112504	-0.817767023922398	-0.185638272130138	-0.372577065101111	-0.491525641090422	0.171119044180603	-0.628376310917456	-0.546259907558163	-0.760061920415026	-0.103836742506243	-0.131673192858126	-0.475181939648294	-0.369168363487211	-0.0614199233059302	-0.393950855604822	0.0361997687389948	-0.137300411636684	-0.744777322442289	-0.50714025358771	-0.884526000819236	-0.217777659432055	-0.506469656300674	0.0758297187807678	0.354603425851656	-0.713643912958692	-0.741223637705698	-0.283288247460154	-0.337421026522012	-0.445433911757944	-0.305258800894463	-0.463656154228055	-0.16916878354754	-0.0165497899499111	-1.38499272187156	-0.585321491014792	-0.536671867821987	-0.776796870896184	0.0977205298975087	0.151849009787091	-0.631822797030665
ACP2	-0.0570316414147432	-0.504608996492289	-0.0802292894857642	-0.861424468926901	0.418716110043526	-0.510675197960854	-1.05807726055724	-1.91755604640384	-0.364528598346285	-0.678849520737131	-2.00087520694056	0.517889115788099	-0.183923703853115	-1.53040082088382	0.454081920893027	-0.614254111062244	-0.310793678677402	-0.504261869690984	0.0622577673822487	0.199958163165051	0.104736374429678	0.0347427587664861	0.196337825655582	0.252813561099155	0.876449748876806	-0.49572858353939	0.162068164032474	0.00416184213783546	-0.521115895016481	-2.11343844051267	-0.449167332451757	0.220182894176261	0.314308435485006	0.158254139320969	-0.411050744428176	-1.33346384987468	-0.142773343427374	-0.114753062628542	-0.213784730427247	0.0206955686429642	-0.301593804180199	-0.368422902354915	-0.967194203112379	-0.557502811812117	-0.184235103983674	-0.0141724245019379	0.0740102825787251	0.320296270494574	0.345231095105402
ACP4	0.510574970435847	-0.146057298525893	0.513045735665426	-0.0293887080453817	0.675775024013283	-0.164439777826197	0.0129813163153398	0.520474764535085	0.160389039524804	0.628040342489835	0.243292775563446	0.31221334379943	0.25031542788894	0.432131901195152	0.812500623893792	0.892816748627263	-0.231873485140709	-0.229158427327754	0.484525297402705	0.0926578367900247	-0.136172503675634	0.244694305225703	0.292866062217771	0.556870645443061	0.86517226133916	0.225824927086988	0.403733865321623	0.0177154946141618	0.138720280609098	0.109346208929	0.132619204374019	-0.134531634202644	0.817987977789416	-0.121493619103878	-0.217841152950963	-0.0216462665786562	0.166659900580993	0.195376297293718	-0.387383390821189	0.0949601070534121	0.222270963462831	0.0939149954160494	0.844887310261054	0.516413797570611	0.0548064134692115	0.202140418503287	-0.0374686477308842	0.585558572049859	0.703584624650437
ACP5	-0.938130778255143	-0.337261755423816	-0.0170955933683206	-0.867991012960134	-0.953937624999468	-0.499410653728684	-0.837923643761381	0.409163725531818	0.481180621899916	-0.641207819256625	-0.623978837323072	-0.514456716558362	-0.725432098768344	-0.37880540574546	-0.848760480852524	-0.959259913290742	-0.67532913059689	-0.767628454089411	-0.963650284495272	-0.300659262353031	-0.281333846548019	-0.216083060812447	-0.285412625557203	-0.1643389985218	-1.03192945339352	-0.777000479075161	-1.06158320680665	-0.247105557950811	-0.584915064627072	-0.615790461250131	-0.425664447531068	-0.838468842457757	-1.17614606828547	-1.17980312534177	-0.966354898555559	-1.04020569165768	-0.721804448998496	0.501239319448611	-1.16854108271422	-1.0308392556017	-0.949234654056078	-0.629643072654988	0.856294657610805	0.975947500991922	-1.15302296749853	-0.832434829492712	-0.974619360601359	-1.16277986019179	-1.12256258744211
ACP6	1.00681793601961	-0.713245958586416	0.839230279193009	0.609906347933814	-0.728742759798859	0.560244761675241	0.781679835563543	-0.328674177378005	0.134165847284601	0.57626295274946	0.0236997666328332	0.13620316559807	0.757471202370023	0.31221334379943	0.303899237139971	0.465224799271346	0.485148926840708	0.56976983528235	0.683769917812017	0.631853989351533	0.309285832243352	0.302607079041183	-0.419884281994441	0.00770582344295967	-0.116536105655898	0.410250082175353	-0.53696311176275	0.458716856962515	0.193652298463114	0.0721964367101535	-0.592978104175697	-0.84351925810343	-0.00239622122189991	0.780675799029596	0.233890743857188	0.06447618518394	-0.0316899515411009	0.180824312061114	0.176460884360918	0.654200769981503	0.925083054674067	0.0168988874035691	0.63026733473841	0.660814676042567	0.629898950468139	0.761572163205695	0.001187806994183	-0.650829330924806	0.469922154429713
ACPP	-1.31232249898372	-1.08498868355046	-1.1973215856499	-1.31499813968383	-1.29810949994252	-0.935669145392424	-1.23042605295414	-1.0225361160489	-1.13868862907262	-1.18207469426725	-1.15671820542333	-1.3777657666839	-1.17575340011927	-1.09620961698556	-1.3535352389343	-1.27093134861235	-1.28278533312883	-1.20801092151936	-1.32143607135253	-1.52427578816059	-1.52086988459162	-1.52501414040805	-1.50864412615905	-1.52285103180098	-1.43934070968751	-1.44851967962139	-1.40876134131641	-1.51942202210231	-1.32891561239466	-1.19413955485841	-1.34110618457137	-1.3392885367879	-1.42210998960319	-1.41418451474711	-1.39328469454428	-1.44920122454805	-1.34971578330329	-1.53670975823581	-1.41605032435163	-1.39876321808862	-1.40647781284447	-1.24337111462948	-1.14754608703848	-1.50240475700264	-1.43537120230656	-1.338842213347	-1.356099399103	-1.41746352922605	-1.42067572653451
ACR	-1.11393010642631	-0.922954340884303	-0.965926329094731	-1.10721693313584	-1.13510815777966	-0.973029825855451	-1.00764518726796	-0.794077968003473	-0.966844863346002	-0.59216093784963	-0.921440866188776	-1.15607061508324	-0.815231143640587	-0.897363150371636	-1.14703514763071	-0.898881047958697	-1.05509934807417	-1.0115325080674	-1.12074700989621	-0.696368586830424	-0.706062630114608	-0.681419280204733	-0.686793868383818	-0.624418381077297	-1.23689058117478	-1.23353185603142	-1.24892695405935	-0.678248968852657	-1.10145424420595	-0.745567150231516	-1.09173143321022	-1.10739444038319	-1.26100369317187	-1.25374621310021	-1.1606910608471	-1.1717874512143	-0.992659513315792	-0.637984321586322	-1.20530788280877	-1.19000756443037	-1.20862189037572	-0.931615192431432	0.701025837862459	0.804348690835771	-1.23619385317175	-0.783831170228472	-1.20431015925895	-1.20401447469423	-1.24087240540778
ACRBP	-0.318992554050815	-0.276045163830215	-0.237770965585812	-0.399122523403045	-0.656619381652544	-0.373135025220466	-0.475187869304803	0.0657108477942571	-0.484482710862344	-0.401140832042403	-0.332315627322326	-0.719212958227753	-0.333656049464989	-0.428646427634046	-0.670791684544334	-0.49471585891141	-0.500643253242591	-0.310866919412881	-0.632649116678011	-0.421205450384938	-0.281717452138828	-0.346173979544118	-0.409935896101566	-0.0842288883623597	-0.50714025358771	-0.566593130138947	-0.591554991882356	-0.277241138355002	-0.420065721382734	-0.215604449676318	-0.474328241819431	-0.401028105352302	-0.529344240541843	0.0795316535084531	-0.464507632200876	-0.425367709692091	-0.462609200452724	-0.356552189691298	-0.302537452151424	-0.825291314902188	-0.513572103395878	-0.305831806866577	-0.0514079090461547	-0.367719980861219	-0.546062253098465	-0.421862786174388	-0.500850505787726	-0.184832255030287	-0.566361861697255
ACRV1	-1.314387613171	-1.18968442673533	-1.26590552303532	-1.32576596571629	-1.3929042830182	-1.23654879678559	-1.32576596571629	-1.16377833114933	-1.19082926879428	-1.18189346305767	-1.19567996756974	-1.11593144143941	-1.22571077380594	-1.19976164492737	-1.314387613171	-1.20567593988237	-1.27809679152274	-1.39379370126192	-1.33391537800663	-0.935948800164829	-0.950787674993171	-0.868757426271269	-0.802766503405491	-0.823041561173741	-1.24056260247087	-1.49131141168156	-1.4948497816448	-1.01325626739625	-1.32778714985751	-1.16088874095843	-1.40336976911497	-1.40530108335722	-1.41082067938409	-1.24642581478213	-1.40876134131641	-1.44404671923105	-1.3827081930068	-0.898553744779278	-1.49330157213812	-1.41506495561685	-1.42699864380909	-1.34512019730923	-0.326382866814072	-0.282043084696268	-1.46651870614061	-1.37801395478391	-1.41506495561685	-1.33635495398882	-1.44956482101619
ACSBG1	-0.354188539004524	0.186462058092127	0.930281140494001	-0.100035832272929	0.564488948300402	-0.242310301069231	-0.359794612076144	-0.319656654583241	0.50622889924865	-0.0633113215432787	-0.576296575802187	0.268732437137933	0.783498137239175	0.0678222299209472	0.0825404826656088	0.883656307786448	0.201082480771763	1.29091325976806	-0.413500266941156	0.519221292678504	0.539209244595827	0.306881009458009	0.0794571900388548	0.241596098158318	0.366129881622626	1.12429461648204	0.71534220623162	-0.0726763710701247	-0.209786221432096	-0.577999179810956	0.557752169466926	-1.44588785269599	-0.747991300326808	0.562304076211075	0.182834359089228	0.125684237992886	1.37846441497212	0.574291433242129	-0.420946906085264	0.261279003637533	0.0919202651905975	-0.144074049179538	0.781330184278872	0.320431332051246	0.487978626862838	0.738028688044918	-0.86969839886111	-0.348544956563049	-0.0736297513527389
ACSBG2	-0.738798729801855	-1.22897411781633	-1.25005435030677	-1.23285816132181	-1.45731321321629	-1.06876047514649	-1.25538132400802	-1.16095232916876	-0.894067788091615	-1.30853419054426	-1.23161021792543	-1.47245136510239	-1.10579306171348	-0.597261958182189	-1.09047447219885	-1.11045680744684	-1.33137968619405	-1.14146968114918	-1.41387201546194	-1.23437165982231	-0.617141969280267	-1.14220141674823	-1.12448365498722	-1.1635915538989	-1.51866205695608	-1.55798212003493	-1.55082023051561	-1.13216466002129	-1.3666310545187	-1.29847034629122	-1.38365620828682	-1.41746352922605	-1.54858261656395	-1.40250505639032	-1.47518584342181	-1.19459193682111	-1.3295497342204	-0.786510929856312	-1.48873032042625	-1.51123333251463	-1.50443292577171	-1.3107373567997	-1.10601690283602	-1.72636455698773	-1.56858826005919	-1.20999263249641	-1.43331338687641	-1.51148137716766	-1.50973568016531
ACSF2	-0.0713193852165194	0.633499230436113	0.856889850034209	0.941805908705703	0.508406954164264	0.0760816764462245	0.3068309979694	0.514885748811478	0.385687089709465	0.0524271409945397	-0.0156400236992371	0.17007897543318	1.82026611624619	-0.288252553754329	-0.134938071716567	0.298695928407341	0.00462690191958109	1.80550011161505	0.253725309477582	0.703584624650437	1.34979328680135	1.05290436475295	0.391475416824607	0.941359712888388	0.433456134465304	0.566502651881924	0.952610779580133	0.842744833608687	1.19454631168889	0.0241186052215393	0.295220661084409	-0.889368105503909	0.290280384160177	0.699644412903285	0.363748256719609	-0.13694883308359	0.404189691834494	1.16542597945958	-0.332649815482171	0.77498891339849	0.294424065348987	0.138049579881194	0.468352616208858	-0.0282952126310613	0.994612389342184	0.764063964222612	-0.0441554010524675	0.645549606701899	0.575045504454805
ACSF3	-0.417488368451636	-0.6079566578302	-0.528466386126305	-0.710121875524605	-0.627564919535875	-0.521178158875727	-0.569519156078041	-0.376411972585025	-0.489642611058543	-0.689339210188417	-0.405656321501668	-0.882076247526977	-0.502784997022645	-0.576662858910652	-0.572223698663591	-0.565652171278309	-0.806659379544494	-0.749640044185037	-0.681360854129048	-0.715953744438051	-0.527478525363546	-0.582733945072142	-0.586799861070316	-0.536763895512758	-0.886706218008735	-0.878719540042332	-0.63075440918869	-0.428377731717396	-0.596563579026351	-0.610791911910961	-0.74109870891076	-0.701284963418037	-0.745399421418439	-0.797455299502672	-0.585936284099104	-0.903862763310844	-0.697764710143969	-0.598916206004499	-0.749823306384709	-0.724937743614574	-0.682200819941003	-0.320124580453959	-0.225647134705787	-0.495889088745535	-0.954650362693564	-0.442215228669083	-0.618343735430631	-0.47536545120021	-0.903607184150793
ACSL1	1.13303238110207	0.968587019881286	0.336287407164168	1.20292179400148	-0.29599686360736	0.996494481996475	1.10632171066072	1.01375905863773	1.03164521571142	1.99425579920629	1.04610127661775	-0.220931418561244	-1.38722280487941	1.3570674607017	-0.185638272130138	0.395051045400269	1.04689791790192	-0.31118435345414	0.94009992542552	1.31037361018246	0.389529784876192	0.519682630682276	0.648706921884126	0.728518611326701	0.780675799029596	1.60993407524078	0.176047030643568	0.669240399008979	1.40542379427446	1.62073177911522	1.24313832689909	0.286087101084352	-0.170553697787127	0.375286733751464	1.41147583268724	1.16665246214355	1.1801266649129	0.707116630302756	0.837853983514517	1.10253176383087	1.39921051264874	1.50104559114958	-0.215857036829186	0.593138088499397	1.26496211201387	0.852768325619356	1.06103084189877	1.33644743850488	1.18298730096496
ACSL3	-0.426622106818714	-0.24169546767806	-0.0601685634685286	-0.267569393168401	-0.173970265455679	-0.167100245119204	-0.567048072149494	-0.745886865527913	-0.245706833872928	-0.317736686757573	-0.321065724838107	-0.138530346194595	0.368148539030414	-0.255479334330559	-0.253928709293053	-0.325986649741296	-0.150155499822577	-0.0811535118387492	-0.533829556059183	-0.162646729203834	-0.149037480766309	-0.280751665927959	-0.156655654438625	-0.236704772079768	-0.541670440766095	-0.112543609501075	-0.0754973323108932	-0.374898835335521	0.0994159112829222	-0.147199869096725	-0.212449840450979	-0.342148526178806	-0.0877650544962885	0.350642653557664	-0.183068871857656	0.274731444050743	-0.0508318084931407	0.0524910932000019	0.0459631426667088	-0.343010916969062	-0.531803572751785	0.0876961031155621	-0.38010746139692	-0.0136967503679457	-0.202018638382863	-0.22545787416097	0.340302050631949	-0.309891297369877	-0.190502220601088
ACSL4	-0.342336455147926	-0.24093409499489	-0.573008045960123	-0.163894046213196	0.182076921578228	0.156702835273878	-0.130075384543347	-0.242966160364063	-0.267310695613317	0.710766170509706	-0.114133251349772	-0.229765057859153	-1.05437355116497	0.23763432759354	0.299636070619136	-0.373477178728305	0.17037621346252	-0.0830194630311479	0.506490136657985	0.718927055852127	0.628134114470721	0.496855717667185	0.488875907710528	0.629569010150514	0.579644056073891	0.549811557249629	0.0814934271545237	0.184087384186479	-0.139971121356795	0.0326247745106981	-0.0489669026208928	-0.114910891592739	0.0587807453377094	0.348488798155504	0.414649425891922	0.153391728326704	-0.068936468957175	0.229928262521082	0.180824312061114	-0.00294639551753207	0.340090659443513	0.293783099679675	-0.336483568818725	-0.638125264776936	0.363875596260324	0.211554295727559	0.422490147697864	-0.110429920020488	0.825393363790729
ACSL5	0.178098116473673	1.14774968872776	0.196054133644032	-0.223462673765358	-1.91420460241402	0.0128177757779228	-0.333319496012762	1.08974245047336	-0.480602822790252	0.40080369545204	0.901696260173263	0.0671366786763517	1.88295445996811	0.0999702348408866	-0.804404471718244	-0.427391103836545	0.542554414849501	1.55378887934715	0.563871316043289	0.62524445148032	0.190129491531654	0.687685321030978	0.725931680711306	0.283832453939852	-1.04726783843091	1.38465105525356	-1.53330273247666	0.603471935649103	0.483020880011594	-0.218962049144907	0.368335744836231	0.581403134191746	-0.389059507268314	-1.48293719886146	0.047959032686724	-0.0524369755230042	1.3511863760565	-0.0992471640450579	0.103757470777858	0.2314656149256	0.81261647102519	-0.710373308912441	1.41147583268724	0.672131680709265	-1.07645230150179	-0.312321425503423	-0.50714025358771	-1.59868026678596	1.08848991200085
ACSL6	-1.31208690353673	-1.23779485274392	-0.704513747045371	-1.08239880358154	-0.66369256908329	-0.841340159586681	-1.29341588130159	-1.59877025433659	-0.612031418957734	-1.0714622982882	-1.59740072924716	-0.470281703870808	-0.236274809567005	-1.68243139635501	-0.565947298634881	-0.739112012644005	-0.761561577100334	-0.726218638462171	-0.74201501113408	-0.55372973883968	-0.543314263467427	-0.648550874087097	-0.674979209508914	-0.424220076076245	-0.353536669437467	-0.765293864053369	-0.755712836593278	-1.0825612932564	-1.05183438707169	-1.86690512050039	-0.836861766979343	-1.24734288284497	-0.425564320211743	-0.335520978155609	-0.71323807710739	-0.649836907771838	-0.442989412455025	-0.596236748531945	-1.20227925097854	-0.681873489674462	-1.00848750592101	-1.41798478585529	-1.56820352655181	-0.719590567789753	-0.984427383291642	-0.532784885258084	-0.440371293605605	-0.564373744278989	-0.679145373521601
ACSM1	-0.75950101597741	-0.591683537947685	-0.689814581886752	-0.769152654644267	-0.753894570933597	-0.654726609568997	-0.655692877207647	-0.212004257601778	-0.622068150501313	-0.553055240918063	-0.550090374239948	-0.832390361355489	-0.667767493306911	-0.570377004453855	-0.829523032866293	-0.498666101472094	-0.692097827882374	-0.690468646222791	-0.823057931173834	-1.12263929952619	-1.14921420400689	-1.11627194625554	-1.15683450519993	-1.12105392320357	-0.863230178809102	-0.840972866182258	-0.847043228314089	-1.12041206375911	-0.792887883099885	-0.528614730823686	-0.857371200127705	-0.686422157215796	-0.816838679933593	-0.719590567789753	-0.77267303085808	-0.843935210097467	-0.730515607957477	-1.14440592499639	-0.817079322124931	-0.554799532363144	-0.689495295240895	-0.622146487585773	-0.507706265665814	-0.949301088706964	-0.823827052857707	-0.707805703929308	-0.77135781204311	-0.766025610074284	-0.849603553620557
ACSM2A	-0.353417259820398	-0.394020739646313	-0.538467580833639	-0.605071861122215	-0.455892185577648	-0.450089825262524	-0.527304409356357	-0.188823863287215	-0.533503485671144	-0.358375098757601	-0.390719444048945	-0.706708670350895	-0.467878070062684	-0.4395898549968	-0.689903095956938	-0.518366342565938	-0.483568821971787	-0.54515776172675	-0.592340409095554	-1.16552417666691	-1.180767150517	-1.12231978818963	-1.17297787408731	-1.15337064967193	-0.688976678848364	-0.609047045888577	-0.539496617941119	-1.15758638459492	-0.635096099781491	-0.363094309475101	-0.624319997602869	-0.438642642941951	-0.483325159998433	-0.543891752308886	-0.638441353460796	-0.660170091309889	-0.629908987514322	-1.18963480686648	-0.660020923308611	-0.631959882932403	-0.664739046405381	-0.540253836754634	-0.17594077798382	-0.522885372718324	-0.640946838541404	-0.516249886280065	-0.719974483422943	-0.653755737217238	-0.680221695922155
ACSM2B	-1.06887732448965	-0.883687123151886	-0.961465220155614	-1.05899923589845	-1.07521032934187	-0.915708065105897	-0.978170242342274	-0.519822047828322	-0.938351882677014	-0.910459211464886	-0.897223841463686	-1.13204219254189	-0.909859976325418	-0.86528280320827	-1.12768090102375	-1.02140387095911	-1.03014618223632	-0.962520668994336	-1.08101999997637	-1.34050539365496	-1.33901747022342	-1.34627836714203	-1.33259957470794	-1.32698137227813	-1.20267472442629	-1.20365557676725	-1.18759520967255	-1.3394535326537	-1.07060868848439	-0.934059045922035	-1.15855628360475	-1.0663099813351	-1.22091649977308	-1.19580443079038	-1.13074296098606	-1.185762434175	-1.00728922212413	-1.33220726431055	-1.17832267140901	-1.13868097043865	-1.16285157288903	-0.942972345664567	-0.830363012553247	-1.22871438929671	-1.21449115637727	-1.09040637477859	-1.07336621429101	-1.18209037756236	-1.18347518466504
ACSM3	-1.32359105486977	-1.20263819109933	-1.26910428403315	-1.3298688786004	-1.40932078191538	-1.15251635916171	-1.29810949994252	-1.12768090102375	-1.2299606127867	-1.24266852306849	-1.22934728399556	-1.46089349534797	-1.17361600518136	-1.17361600518136	-1.44392867869548	-1.35819959173378	-1.34138935488683	-1.22728359950916	-1.4054141620569	-1.53239313038489	-1.4980951035837	-1.53205048678629	-1.52946003649914	-1.52501414040805	-1.51491672227425	-1.53358875052986	-1.50973568016531	-1.52501414040805	-1.39347216895203	-1.19397911002051	-1.42020351021767	-1.40093215015606	-1.53704387201129	-1.48931136679647	-1.4642533724832	-1.52527480491419	-1.43378839854677	-1.53733991204474	-1.47171993166767	-1.48419261494643	-1.48582850971021	-1.30970627590906	-1.11579828974346	-1.43352453596337	-1.51889780229117	-1.41853605132237	-1.43904058881379	-1.42586275768333	-1.49634637656801
ACSM5	0.0896307032920041	0.914955208338716	1.00681793601961	-0.0267235808759962	0.276982173686914	0.457345078525743	0.454251748618564	0.622145470728781	0.399905937176949	-0.258790665329555	-0.369611445111136	-0.032703790124408	1.02994426170223	-0.0537053684560986	0.741999731121064	1.2793339097322	0.534293605621934	0.887739447121607	0.733906182500495	0.313547560541093	0.506288791598201	-0.198287649652522	0.241596098158318	0.708309656087551	-1.02236813146343	0.194841432928882	0.377056211242718	-0.170553697787127	0.0745271913705842	-0.754129894813059	0.62463639174768	-1.02723980142926	-0.0672062326058686	-1.07980735536547	0.738028688044918	-1.2671668647335	0.0306532641237967	0.425518775990639	-0.0541487904721322	0.677662586922775	-0.103091633317076	-0.0715403559020443	0.330199038722503	-0.440442538015757	0.521285531771636	-0.143782646394713	-0.0470449193708567	-0.243590933535658	0.71534220623162
ACSS1	-0.276901242746805	-0.296324525100208	-0.068565792159143	-0.341420407823403	-0.456934116318253	-0.20314161993085	-0.307006108002478	-0.196749444761182	-0.168773442999043	-0.115616591276451	-0.496268431022545	-0.830772454796025	-0.00401654873449373	-0.408637985386277	-0.818246886924277	-0.36428758892872	-0.20748652035092	-0.0762661221941507	-0.913782864564988	-0.579048598872931	-0.479964721236121	-0.463042829152922	-0.690809174466224	-0.415874651867969	-0.810910801518376	-0.668988844836805	-0.371506884679314	-0.558673459861855	-0.19183234519007	-0.234770494203654	-0.466689565085155	-1.72540931195221	-0.731921052214815	-0.329241026015925	-0.213254202303739	-0.612224524713015	-0.759634286759705	-0.51645387394929	-0.587328228446191	-0.245401471792716	-0.821516611776489	-0.324738278328123	0.214451219170823	-0.418700864645648	-0.578423644955517	-0.320518951847108	-0.575741929798977	-0.745567150231516	-0.358627028853407
ACSS2	0.346664353226262	0.0663640134175081	-0.040444492133176	0.208590918257066	-0.0286776187109788	0.622145470728781	0.396210602781792	0.199454420379894	0.443357543705185	0.583936552338249	-0.0138651681943303	0.0846201480985674	-0.498919609715834	0.528277739120498	-0.313159477775759	-0.843868044595316	-0.0953129795180671	0.44981667393319	-0.296971390589698	0.313006944226712	0.0482696505959008	0.291136493244122	0.110211968167472	0.0833869265913303	-0.299464943833172	0.409886394104348	0.15292741712559	0.498401681396008	0.834689378669005	0.603471935649103	0.334750197798522	-0.481441023501796	-0.749037363297659	0.0870869511984867	0.559051335884299	0.610426553060848	0.215993359430796	0.454594907900449	0.417023140795005	0.298781871758893	0.435006882300271	1.20061571209837	0.543679326388685	0.431315085552666	0.782358174272572	0.33181332492149	0.678842375211638	0.789990991584676	0.199434540608269
ACSS3	0.246225576749508	0.541667576013398	0.697194777344943	0.453816386274386	0.18518070203491	0.458046106874438	0.396419442529329	0.368464752892697	0.801348777450905	0.283335999567172	-0.0723038733679534	0.0577931146843921	1.6727724081453	-0.253769938594593	0.0854990223780961	0.979501477856174	0.281359642364619	0.5269450548592	0.120865270201698	0.0214381442222051	0.130494608884379	-0.371591690901205	-0.360626385753105	-0.119568880826799	-1.0010249481147	0.30457123020426	0.621419181381014	-0.543236206002328	0.178320859457302	-0.630416861749685	0.763169250405732	-1.88100030393059	-0.021845672260968	-1.05731139752826	0.628658723396525	-0.466111108935327	0.789990991584676	0.0195487169730627	-0.781245189584326	0.645193935646166	0.674568691811315	-1.18814622613291	0.663675693993345	0.227438869035863	0.291965445573925	0.240575766429157	-1.51393312801999	-1.38319919532844	-0.0316137350843477
ACTA1	-0.4413174587644	-0.903244934943837	-1.24840661406918	-0.45484879537304	-0.761118842100956	-0.590814110593284	-0.599615263297874	-0.260239204327616	-0.778716630451335	-0.55745077061443	-0.550245680477275	-0.638789261032395	-0.388492779565052	-1.17447456303132	-0.805746392052089	-0.664909706355472	-0.878541663078571	-0.449426187561209	-0.750716021876703	-0.653755737217238	-0.60466208981602	-0.58096296136501	0.190410530072932	-0.923672057628222	-0.522646279233247	-1.42632132851766	-0.798707879525633	-0.118008156590178	-0.610571347640803	-0.494966575550355	-0.797848523884727	1.35796055606238	-0.817448954409258	-0.0653477645408611	-0.666637217447756	-0.958443565882449	-0.637828283047334	-0.566816068410729	-0.380845696937183	-0.757658910357578	-0.735683382364658	-0.94752976805195	0.432105000649259	0.135172748507011	-0.346729590715152	-0.585510658412206	0.0511729661161449	-0.742419738058368	-0.791034788275708
ACTA2	-1.04539566568971	0.266932669485573	0.0585739982645269	-0.46796389449538	-0.66621415940642	-0.316997490418825	-0.540976788611307	-0.0315316333911753	-0.366308445549648	-0.278361907713288	-0.4364394149756	-0.843655785597239	-0.452561288281702	-0.51294907282786	-0.7154552297428	0.390991244921588	-0.158596328708043	-0.487232382391467	-0.446974870297362	-0.870221467513126	-0.728647706573291	-0.745567150231516	-0.654318423843345	-0.461060446735385	-0.713016743407695	-0.276025018744532	-0.772019492682891	-0.714381179278401	-0.351874960798256	-0.711207029071199	-0.541176010082246	-0.0715980854195813	-0.510183687210652	-0.697254445600977	-0.602231668571908	-1.56448957324447	-0.325343539302168	-0.409186487461587	-0.238065061980092	-0.582592251905351	-0.442215228669083	-0.548557945504971	-0.756891943004821	-1.0888722395978	-0.942972345664567	-0.00334452735565379	-0.310623474150371	-0.861428725988336	-0.783370621157104
ACTA2-AS1	-1.15472689029604	-1.20037341209266	-1.25041707964289	-1.12434621652587	-1.44437356724584	-0.963738793841285	-1.29484157803058	-0.418702363303868	-1.21638284110212	-1.2849019828109	-1.28080242146738	-1.43968409725793	-1.02336945940414	-1.17487542626207	-1.44510027589877	-1.3558568999872	-1.35933660388202	-1.036680984486	-1.42163912295277	-1.36165742738468	-1.34842223133698	-1.40830064745096	-1.3299350605042	-1.38724122250205	-1.52890149745968	-1.53510035487818	-1.53961206645093	-1.36247953851419	-1.34031238010214	-1.2986449263641	-1.42179278567943	-1.41579081587871	-1.55189535489675	-1.54231612473115	-1.46555285020286	-1.51972858216394	-1.42123204382125	-1.33589430140093	-1.50267122543609	-1.48899464982315	-1.19977326786636	-1.28198399047732	-0.905985282502743	-1.23248197140778	-1.549053903015	-1.42564606203286	-1.43518565998432	-1.4980951035837	-1.48943913797779
ACTB	0.0329961925596485	-0.123676648015149	-0.115563663001646	-0.461590969552712	-0.280961605264807	-0.0151305567024366	-0.192509783591564	-0.27202826571749	0.0121720966196951	-0.251327621724251	-0.649478456285764	0.120288381585487	-0.279634569388724	-0.468419669469174	0.420419297133899	0.0668468510512323	-0.0476203850244675	-0.160999156489529	0.15447182026727	-0.213696578086296	-0.318820749485091	-0.250675838811806	-0.127646561384279	-0.402485751001813	-0.157294781396694	0.0672112317070938	-0.274072610487227	-0.165730888956286	-0.0850732469739267	-0.463975296593442	-0.0616698139771818	0.249293037558613	0.121301271626736	-0.0744094089757201	0.00631643424093688	-0.288790826898219	0.00835016637008934	-0.214788812857931	0.122796932002188	0.292866062217771	0.415069209591241	0.0156478641009752	-1.01386530091392	-0.127778158451181	-0.0565846820171331	-0.33632686382153	-0.143537443552447	-0.0357289298617309	-0.0597251686812396
ACTC1	-0.824243479560663	-0.97995578854614	-0.88565963827008	-0.976250192953779	-1.10518258932938	-0.56878653364697	-1.02068717481823	-0.771761331117585	-0.937026087015365	-0.938815675735226	-0.989176168958738	-1.04386737141484	-0.80953657071628	-1.22803379232469	-0.960841704706242	-1.04651557683172	-1.11489355834528	-0.914219928358981	-1.1616953350126	-0.364621778302974	-0.562023601350778	-0.445724556025242	-0.403054403132052	-0.499956794726525	-1.10464010124666	-1.1033355548852	-1.1000069230869	-0.439303322396962	-0.951568965802577	-0.82061388922939	-0.9655341581996	1.6262081299927	-0.823041561173741	-1.07714538005145	-1.21332432881865	-1.1497834563029	-0.311847844202477	0.210745426688532	-1.08382673334417	-1.08970362235168	-1.0450354785991	-0.958905135256153	-0.780823954399315	-0.879243191811579	-1.1043426748233	-0.994529621628357	-1.0265965337778	-1.00809847152027	-1.18326190467664
ACTG1	-0.133909186510796	-0.183794961736753	0.0484871749615997	-0.44734327182742	0.313003198560358	0.0258042024531119	-0.496268431022545	-0.10780846621473	-0.0210395254591616	-0.0486306817830772	-0.907399741695571	0.0641471319830827	-0.0825216324424738	-0.495254464067904	0.401500701570968	0.0547110983378958	-0.205649069515033	-0.0590443954974468	-0.0633113215432787	-0.118075891158146	-0.179680177360672	-0.127076822953141	-0.00553134868065023	-0.126506712370683	0.069025130184629	0.190934470361111	0.316683467168296	-0.242677004005708	0.0120510281597168	-0.739234318909016	-0.169021837480399	0.284158990848693	0.214770815210346	0.15273490121616	-0.0217098189276981	-0.318688455598029	0.108069486530707	-0.0713658283652748	0.143736183008201	0.28973076408478	0.299260935389802	-0.0573101881466252	-1.09107727302823	-0.552781541207229	-0.038926191737714	-0.192941418506859	-0.184487033105744	0.051375822362562	0.104500543511488
ACTG1P17	0.328575015907232	0.0684691955826431	0.175840152471265	0.0180687838689736	0.687254587790397	0.0683961276610029	0.270213114747201	0.152396184231986	-0.0462295660994679	0.381070803316936	-0.045494823322066	-0.0240857016355861	0.0701929411922409	-0.0303156454841437	0.245706343958644	0.166036026425862	-0.0409132967922087	0.155384182415931	0.126496895219625	-0.423581261188889	-0.301730663350632	-0.371416037995925	-0.407139868040295	-0.116044500543869	0.281910646312902	0.187076646190775	0.646243448625845	-0.479029111693759	0.0677210408845535	0.132114214966924	-0.115694184896525	0.136120333722771	0.438325549368892	0.521025786067666	0.174844810465336	0.0942381542411707	-0.0563914398543078	-0.35385370263198	0.0849356701299383	0.236320986912789	0.185460733368086	0.0141818307385866	0.330853049642267	-0.0507551022648044	1.00934317273742	0.167416928846652	-0.0053167619658061	0.216379610565015	0.305074838306408
ACTG2	-0.926228896118244	0.210234356003007	-0.583102470248278	-0.925662586299206	-0.629584980299259	-0.776613626359294	-0.731887647144972	-0.325444201754197	-0.659278283357613	-0.475506266522858	-0.695973181064348	-0.897223841463686	-0.799882257138372	-0.674454882292542	-0.913782864564988	-0.498847175133977	-0.816526336245441	-0.840942336445699	-0.768025688625369	-0.819338653138507	-0.871267014323181	-0.892642499138056	-0.771629880077749	-0.673034881465541	-1.09575075829715	-0.672884710874127	-0.804789118054518	-0.900853802837732	-0.422627858671534	-0.788121123453638	-0.89137281150711	-0.117741342318618	-0.996027615878022	-0.766143043363898	-0.949735971770904	-0.994320913072194	-0.337257736063687	-0.0670337421277137	-0.94526347690053	-0.873894157719012	-0.760103510739068	-0.737626103675801	-1.21864085631626	-1.54869727504946	-1.02582962170446	-0.555225167555809	-0.646276936816999	-0.864740463538417	-1.02288937530157
ACTL10	0.182563102471004	0.0545209748288035	-0.0434868282558015	0.0774992059733138	-0.468419669469174	0.0309076617439224	0.017120726586497	0.270550668933113	-0.0520890118966175	0.090843755768549	-0.0321274330457809	0.0914603795325321	0.614560208372615	-0.0512732775158801	0.0237385852528699	0.107168381436473	0.0116737107826479	0.160566322640463	0.0676067586952097	-2.10128103332797	-2.24764773149347	-2.09932771325424	-2.20508715461886	-2.04506293472636	0.0913176857672636	-0.0364257435964175	-0.465451761214973	-2.29269561669095	-0.0277184358634665	-0.0906327719119655	-0.10114508554481	0.103611985840056	0.0521788843278611	0.221342538226769	0.0717073392075536	0.0643205816573092	-0.0287563313711174	-2.10474405745963	0.0872626586162074	0.100786568697779	0.0658550007407208	-0.00991510199826444	0.188573972033657	0.134826024357181	0.244225322759013	0.0199522098025161	-0.0877650544962885	0.0811031672997876	-0.00643094342135732
ACTL6A	1.04610127661775	0.953792082201405	1.11906696640153	0.560812809502752	0.30261196026902	1.13752926440337	1.30034165442259	0.237239703561603	1.23831930126833	0.828793409093652	1.81791435561745	0.577100922032552	0.0991243818864363	1.27743152202488	0.180710738239588	0.877418865765695	0.982194628783401	0.500503662009316	0.905049597613783	0.19852253127906	0.700095854681752	0.433165438105947	0.280915510792161	0.802389941562515	-0.396405944724609	1.09824689358284	0.508908287846997	0.452511260526921	1.22807160278531	0.923845202899156	1.20921843452891	0.218698493492065	-0.122117598968988	-0.40507170996008	1.08848991200085	0.770216993841296	1.352577841889	0.674568691811315	0.957975559046627	1.00315818971626	0.872501831403476	1.17700642509395	0.40714916313423	0.2026495226817	0.904650383399058	0.881406007738219	0.906543219206702	0.948122193302072	0.449280461954999
ACTL6B	-0.816972383152551	-2.89294646734792	-2.48416613373508	-1.1213714888993	-0.705648171756113	-2.42522330889306	-2.03915663941593	-1.73430783414788	-2.41952346671426	-2.04485335753175	-2.48416613373508	0.34299377871964	-2.52439134667836	-2.18029446496877	0.0325481991843726	-1.77546613177773	-1.3558568999872	-2.36062831127087	0.0272571381516268	0.147188985248367	-0.236557553890176	0.0800125196592035	0.1297134111751	-0.216686513891477	0.21713367648149	-1.02518250275199	-0.881733792646747	0.0729651796931349	-1.97298526529792	-1.76313031180897	-1.71038702833768	0.194362475311773	0.434177104485555	-0.135875398095051	-1.85573505585084	-1.28950051951125	-2.10128103332797	-0.427258353603653	-0.868321748536118	-0.866901806373796	-0.845978447913986	-1.74568219529052	-1.54268010805255	-0.344207474025475	-0.836729756447133	-2.00623528599549	-0.495257838570074	-0.195453154929921	-0.45342688813772
ACTL7A	-1.62289069420265	-1.36673758385513	-1.42780286341911	-1.61175280936743	-1.64199406438397	-1.35765723673979	-1.50223112318926	-1.28702128751718	-1.39133621896552	-1.4749742845792	-1.42823190523535	-1.67474640248225	-1.40835705604266	-1.3336239388971	-1.70995312425427	-1.56968034549655	-1.55366053692434	-1.45947127460292	-1.65240755230261	-1.78128324635653	-1.79713915326648	-1.56143354002155	-1.77092856253481	-1.78405506129915	-1.61804188080828	-1.72515936335108	-1.69183888849603	-1.70255622640598	-1.54101917405654	-1.45468941013473	-1.60027232527978	-1.58308157772963	-1.72827226681115	-1.70918663553881	-1.66174991149959	-1.71831163952201	-1.5509853380045	-1.79636686413225	-1.68159744941354	-1.66555356657164	-1.66572525109074	-1.47229351099833	-1.35506957958098	-1.65205236310309	-1.73455585610681	-1.59016949679496	-1.55246699601499	-1.68038254996582	-1.47143179548151
ACTL7B	-0.724030196203802	-0.55611997879024	-0.597889729134886	-0.711342104642387	-0.719105765711242	-0.597368681687576	-0.598416004482705	-0.443342361138519	-0.551510146975189	-0.467427986676768	-0.517148534086768	-0.879721025475048	-0.613337350904116	-0.545879998786874	-0.850581384081001	-0.616962736226478	-0.62778733596962	-0.622943151931351	-0.720866187736136	-0.665005290282635	-0.668587279894098	-0.652265973454572	-0.652603320691707	-0.609575521732363	-0.807298852053317	-0.583941743187717	-0.812543163993888	-0.645402964769082	-0.679001491919134	-0.510429368035718	-0.686973163586189	-0.622382669682132	-0.802638690329703	-0.264047405306744	-0.68923045444623	-0.739358181288171	-0.658985694709283	-0.66690106717481	-0.765759120720799	-0.777605208483773	-0.743500527495963	-0.574824149962184	-1.08683053546179	-1.37178679314418	-0.813668909192034	-0.665247924208946	-0.724794252918706	-0.768419005733329	-0.802030193595938
ACTL8	-1.05689645374026	-0.789747258670225	-0.778388056763535	-1.06706505146997	-0.976382823595996	-0.820912253986353	-0.659278283357613	-0.682140826268296	-0.720296988778387	-0.788149063413195	-0.718286252506278	-1.02486489846545	-0.934663335690716	-0.76588379001195	-1.01798639118109	-0.750980210901509	-0.888614592358345	-0.899630298096464	-0.971118836643839	-0.741654220431147	-0.70721650374729	-0.655422200889073	-0.687757452714768	-0.676024422317965	-0.904055599278496	-1.06562470256261	-1.08334799673339	-0.459175769722767	-0.498919800634022	-0.785624042232433	-0.954365135312475	-0.922691082577875	-1.09651952237867	-1.08859737433757	-1.00728922212413	-1.05816013430247	-0.954116054233552	-0.684332211254214	-0.945535328152005	-1.05061711274738	-1.02954915477457	-0.815674862344311	-0.369069966710118	-1.17140827416435	-1.107651076168	-0.708930868313452	-1.0080226467458	-1.04924675260844	-1.06578377955831
ACTL9	-1.30754768484977	-1.1478365585485	-1.21399248155968	-1.33506781552212	-1.3533966582216	-1.15372114246233	-1.24452645085147	-0.0522906472528795	-1.15422498596512	-1.1990839894645	-1.17272524391961	-1.39208865388258	-1.20055798480708	-1.1210518753182	-1.33712135849003	-1.29372281731568	-1.29871167655046	-1.22823641540945	-1.33682071863811	-1.49520805238085	-1.50629555592621	-1.49529465478358	-1.45491896837512	-1.47739098947811	-1.46160561958745	-1.47555272767774	-1.45844323716892	-1.48956690915912	-1.32166825421551	-1.22091649977308	-1.35227860926142	-1.35211389279623	-1.46952852184931	-1.43575664721147	-1.40989623310044	-1.46501944751043	-1.36088597235649	-1.48461243064161	-1.43477184540292	-1.42067572653451	-1.43026667409574	-1.23862266104013	-0.998701846680083	-1.30828940436161	-1.47143179548151	-1.35813908092623	-1.3781117128118	-1.44441943770032	-1.44230610331176
ACTN1	-0.534875568639331	-1.05083555736029	-1.05394951966216	-0.708048390149804	-1.01240892764465	-0.970389505765188	-0.91809460316119	-0.530478067342103	-1.20055798480708	-0.871435396374317	-0.882213459000837	-0.417270469029843	-0.818467170111507	-0.869270814731664	-0.696623731538417	-0.766501348329302	-0.486262708940321	-1.11856693865253	-0.394450551853297	0.182653381668983	0.00147880240836095	0.310637998013089	0.409732271178751	0.142939254661953	-0.734367179586569	-0.640456008505004	-1.01686929262504	0.2869264470379	-0.938103713751508	-0.836999991420918	-0.679345174539806	0.504594013523035	-0.0283776184957867	-0.301811289499679	-1.04254928431598	-0.914225743832145	-0.767405755350589	0.0417293868476881	-0.551699181393115	-0.831178449310785	-0.286846636157564	-1.59465426116876	-0.436965477764344	-0.116991273792229	-0.775542411340929	-0.965676114875231	-0.826999136622949	-1.45952064658539	-0.913562398600568
ACTN2	-1.02498746719421	-1.036680984486	-0.610843025800098	-0.825224346434786	-1.00134921454298	0.331859609666212	-0.679981217196754	-0.834539589487646	-0.0362601899645625	-0.781246990842513	-1.79056439537587	0.650636035844126	-2.02640447026765	-0.173210271204805	-0.54515776172675	-1.69605185728351	-0.75243517872415	-1.30481059299014	-0.520079925647308	0.0448000544294963	-0.25344261363878	-0.289985028105186	0.200830765868894	-0.414274607841639	-0.5170791329917	0.473328480849611	-1.1181805056636	-0.266137298917936	-0.284168373956368	-1.15868574533274	0.00207813760002328	1.06103084189877	-0.0209082139326382	0.519682630682276	-0.301452275910889	-0.26253142049977	-0.143537443552447	-0.341280475718193	-0.258590397154822	-0.403794290001398	0.0180249983744736	0.568058777407235	-1.46879538061532	-0.502132742101502	-0.184487033105744	-0.188674971552784	-0.648550874087097	0.283497527835316	-0.315445626731522
ACTN3	-1.33241047217021	-1.1616953350126	-1.22720053931971	-1.36882464200786	-1.35997525099179	-1.17904565318089	-1.28080242146738	-1.06684322735187	-1.19935725904256	-1.23259239168927	-1.2018901241231	-1.43824074802302	-1.22424336748346	-0.76438041151457	-1.39613037920925	-1.31475349259856	-1.28962909728404	-1.25255542587483	-1.37961627021732	-1.58687082309919	-1.40336976911497	-1.56071872785724	-1.53961206645093	-1.57389506730167	-1.49573669286064	-1.49923201426028	-1.4642533724832	-1.57449257545348	-1.37228642987307	-1.24806276742398	-1.27966934581927	-1.380518271669	-1.50443292577171	-1.44000346189373	-1.41934165844804	-1.48154222963586	-1.40326737603534	-1.54291101378166	-1.46268062498139	-1.44797398253814	-1.46455498992455	-1.24610061935923	-1.09173143321022	-1.36493616464118	-1.46455498992455	-1.39215094245614	-1.18926846835839	-1.46968395549357	-1.45875560650009
ACTN4	0.344038325599274	-0.17729303205505	0.0358791945948729	0.562911173809338	-0.849905057031491	0.214140753129742	0.445063620671189	0.136655687409254	-0.0885182046127383	0.16515257042126	0.075310770233354	-0.581151750258848	-0.134854902755116	0.862526790059496	-0.567933799394668	-0.0388852116275024	0.0846201480985674	0.406439760672306	-0.52966091253381	-0.477668402517799	-0.381236695050246	-0.263002847213597	-0.141246178483838	-0.315213874038026	-0.975744539880618	0.49631510871728	-0.749954270780916	-0.0728870244892104	0.308234310399863	0.804348690835771	0.378195130221799	0.0618241535601734	-1.16570279402661	0.237305857136159	-0.220526376182476	0.327388287811886	-0.132943268282054	-0.0921343097478289	0.374745024948841	-0.469789802120677	-0.343477375975425	0.249293037558613	0.73277064157032	0.445183764434027	0.3912693302821	0.304943289885117	0.18795227232083	-0.0525726800996879	-0.00711438082122847
ACTR10	-0.95113404387255	-0.675730505439175	-0.541475476963103	-0.911486477587746	-0.551683383022869	-0.332977946095661	-1.24866702349267	-1.42120271789774	-0.257162280838936	-1.22803379232469	-1.37817306362348	0.780478610691213	-0.383901623222855	-0.897810716755396	0.3764206036338	-0.643196514872022	-0.834264550662329	-0.484747789163954	-0.34979863768194	-0.0256397763392292	-0.196856242361581	-0.215429397847428	-0.136024435821727	-0.166809777646146	0.111951730913342	-0.0520096343667922	-0.620298264738043	-0.373971790962016	-0.684459285886662	-0.850104375667629	-0.556506787970287	0.0171269224249559	0.770657232065205	0.00703012945928519	-0.289426721021873	0.166485869610351	0.233222613612953	-0.0894863600698906	0.483601565616411	-0.272226620913032	0.0594086641250888	-0.0917664725215871	-1.80027565709893	-1.10705891210517	-0.0754065089913202	-0.671801492691667	-0.0555616027029108	0.624966453404297	-0.380845696937183
ACTR1A	-0.424316092640616	-0.36039872144149	-0.129895662532973	-0.347303572261981	-0.378969424399177	-0.553723437793789	-0.370562772282298	-0.102200991676429	-0.133176455829296	-0.475872451841298	-0.772542486621129	-0.11629371819566	-0.369072816369987	-0.402473336172571	0.144591480441851	-0.443654787603688	-0.426987341898349	-0.48165936105866	-0.285970647980733	-0.0490687783208138	-0.291039147352101	-0.267890773897809	-0.189896394466594	-0.441292416164102	-0.0897610508441084	-0.334216228364458	-0.444421535186574	-0.317543613793944	-0.198943798812299	-0.232496877029526	-0.160938018081665	0.493253054888583	-0.124911242754842	-0.392426036685384	-0.454239292840421	-0.263151603192689	-0.0768830887627727	-0.424220076076245	-0.115829497769987	-0.161123824956816	-0.272226620913032	-0.0925515107844896	-0.862398693606481	-0.431000149566562	-0.16075154431321	-0.517517297014576	0.0225151839185828	0.0631226349299424	-0.272171995864096
ACTR1B	-0.0599351673944922	-0.605525114434161	-0.418926689428926	-0.422259330128809	-0.778965197118715	-0.555113937095092	-0.328845303067115	-0.882947092761077	-0.411835348528661	-0.386259148788679	-1.3434883421442	0.0592826584866166	-0.339468427330811	-0.850264653317413	-0.0214969165731609	-0.57229602712608	-0.174787073419153	-0.379423836351167	-0.338267125355021	0.130580732242331	-0.157087806217872	-0.0456866016329331	0.0291091065672044	0.0864017137225585	-0.190718158758572	-0.610656874502934	-0.883627006509983	-0.0536279091602934	-0.328209590698192	-1.20322643002813	-0.219957832808487	-1.29604830254364	-0.196515535927456	-0.116615583608636	-0.858622459307429	-0.406408129870481	-0.783961969860057	-0.13859993534442	-0.376609134706774	-0.25976054621309	-0.561251106080532	-0.231127954610136	-0.389803071992468	-0.139185239431941	-0.382545655596007	-0.66195303546258	-0.284685098046422	-0.444515351878849	-0.0472401847325818
ACTR2	-0.93211326211665	-0.391328709864334	-0.576296575802187	-0.725647074293895	-0.734911024741709	-0.451659114706889	-0.571750789173205	-0.773154615802685	-0.348157873770876	-0.867503262043998	-0.633562647577792	-0.649580232052274	-0.805954907953913	-0.969508164071326	-0.445232130506633	-0.19556812389211	-0.517080613531138	-0.592440687046777	-0.398642053611306	-0.820899109145655	-0.878024608991109	-1.22244242940023	-0.859191986240857	-1.23854929453359	-0.458176538153228	-0.540253836754634	-0.859316217043279	-0.992266519778804	-1.04453328956176	-1.21658193956318	-0.450266162148077	-0.149459830169957	-0.0841545406370642	-0.718131871199296	-0.515633517280814	-1.02391774146292	-0.417930868649493	-1.06371970491014	-0.683951266757793	-0.912519823159262	-0.428106622488641	-0.289426721021873	-0.929531366648687	-0.423080221802622	-0.871440830912075	-1.10153798666889	-0.28369689640332	-0.578423644955517	-0.853511247161459
ACTR3	0.25082866936006	0.179041220232789	0.123688622042374	0.059877774642742	0.00259406346444544	-0.0333361932256731	0.0994168494645569	-0.154647491480812	0.0600563539809533	0.0240236531746742	0.152095671665654	0.101216371339059	-0.439363651620733	-0.114274019798848	0.0380586151792639	0.490659769713753	0.43283046569438	-0.342607984245355	0.494362462258385	0.329243359492939	0.242984453692562	-0.0281592910874544	0.36903600670307	0.155101105808232	0.513408883134961	0.2695824259145	0.0298714100801366	0.0192091476221788	-0.096682381522459	-0.22272537837499	0.312000293638335	0.331252965066742	0.396518187652705	0.113967241232403	0.271488899559724	0.0394585269561297	0.770216993841296	-0.0118503512712479	-0.017451886414996	0.466424952747339	0.429147125084639	0.162845718475352	-0.585831283029831	0.0980466256468029	0.107735811986889	0.00695656831830454	-0.0125955191674132	0.183534290530106	0.61221994807554
ACTR3-AS1	0.223040528154813	0.019898890210448	-0.202664594104524	0.25724174643449	0.30907980423226	0.0221375357848149	-0.0839663788477465	-0.0234227105395057	-0.191882458138834	-0.0200544036015756	0.0860894730122696	-0.10521957329263	0.0846201480985674	-0.148986063788755	0.138314878006678	-0.107383124828473	-0.0834939606288215	0.0239416001534967	0.219484249643739	0.193749152725502	-0.7823996619856	0.072476123105043	0.363417973711225	-0.0939513461636147	-0.000438392608549163	0.0550442199864284	0.287845016726512	0.0979813149273323	-0.0873677348048768	-0.00321318299706318	-0.00621129189705486	0.655649678546373	0.648706921884126	0.0300786064530197	0.0913176857672636	-0.0331280465352242	-0.0769694325730714	-0.179097050664739	0.311746822242155	0.707949937294424	0.989019606738544	-0.14284203247223	-0.34916755641471	-0.260124271299044	-0.0280541417948226	-0.0814164512878712	-0.0457542547756237	0.50776265478554	0.00321687333438767
ACTR3B	0.363485903656909	-1.48429020908567	-1.35193307904305	-0.705063951078695	-0.0446075540441446	-1.46339789803029	-0.49559945271329	-1.63330463277011	-1.3402391261189	-2.00484892653666	-1.38366637822963	-0.288661859431798	-2.26225416860359	-1.57573154068937	1.12782733817179	-0.0801070919758453	-0.541600149831517	-1.80319162713046	0.892315961434865	0.631122832027912	0.123031763371673	0.173171856893447	0.37447514577654	0.0183668004093591	1.70095008468356	-1.12572303333698	-0.308695601410579	0.188305949142615	-1.62768421490711	-1.75526337643476	-0.939209470114879	0.934384136600881	0.90989009332913	0.512916721279815	-1.09853392298268	-0.119568880826799	-1.25777864375062	-0.234149856467482	0.0307290489603021	0.0357566811520479	0.322496602418501	-1.1840303220337	-1.54402796990176	-0.588028383691655	-0.250217275409732	-1.39605180562512	-0.362665491586935	0.625475489306235	0.381563657343733
ACTR3BP2	-1.3329834005556	-1.10817027280934	-1.13172809255889	-1.30902373746549	-1.3138461436315	-1.12931331903209	-1.2021513870227	-1.02529752926437	-1.1252411325801	-1.16618307736258	-1.13868862907262	-1.33009884073198	-1.19098143314004	-0.774352379863859	-1.33217112975735	-1.22457824675364	-1.20686671845994	-1.20821534070297	-1.27666909412194	-1.54869727504946	-1.54635594560991	-1.55246699601499	-1.5412428014567	-1.53762623098958	-1.4067067316423	-1.40563707214863	-1.42279912849148	-1.55189535489675	-1.26314680327395	-1.18239752206689	-1.3579231357892	-1.30609107813608	-1.42890203533231	-1.41798478585529	-1.35190361523799	-1.40460048017448	-1.32596002477142	-1.55594986220607	-1.39290318809911	-1.36354358711768	-1.37078715557687	-1.17351921297837	-0.402780052973347	-1.27843807008604	-1.42928591631418	-1.32185526205696	-1.29139966866393	-1.380518271669	-1.39162967635108
ACTR3BP5	0.315278479259966	-0.0116241521453706	-0.124999590935004	-0.106443567383234	0.066995600024417	-0.0783222382343564	-0.0480403044657963	0.077332723989015	-0.116750466181537	0.0445574301171373	0.0229876649221536	0.0198419506840829	-0.0478929842574403	-0.0528229820458935	-0.0131966611962388	0.0353488104293396	-0.0748340937901303	-0.0680508843262182	-0.0981819725558475	-0.73253809670819	-0.745687190577957	-0.727030402204083	-0.727030402204083	-0.674272556110655	-0.0747657359584708	-0.0425696938456342	-0.0211177384642127	-0.702594292217221	-0.137020516212177	0.00160181502041312	-0.125096404822051	-0.0242842564201269	0.0145440160531444	0.123936064246156	0.0486132030565518	-0.0562584222905868	-0.119903686129429	-0.746611577033813	-0.0696336461091109	-0.0119970638907157	-0.0803293907344186	-0.0904350163931077	-0.768479497495059	-1.09009444718225	0.0156478641009752	-0.0535547909092276	-0.432699832811276	-0.0773359911519695	-0.0679547609926462
ACTR3C	-0.427731732506992	-0.533574863958767	-0.39857109283459	-0.299260492063317	-0.334340237043655	-0.60880068020886	-0.43313348593387	-0.268005840911753	-0.377173061691482	-0.222620447738648	-0.0806803848949085	-0.478063610135293	-0.300703475662834	-0.354651565380745	-0.148236247769476	-0.358532268377288	-0.48897554600177	-0.69865881690451	0.83018275888418	0.191790324000306	0.23972919420752	0.336754350441916	0.234954375952485	-0.329999462715849	0.653451275595676	-0.636314976391129	-0.519637462339946	0.19524703075658	-0.383055285128766	-0.38102007023987	-0.584825407311602	-0.332988158502621	0.0872626586162074	-0.554239591352661	-0.490841653401491	-0.464507632200876	-0.328209590698192	0.194161787945042	-0.607491140219388	-0.606868264863459	-0.62627279956912	-0.627110258249334	-0.0374686477308842	-0.00621129189705486	-0.566903365262682	0.147916145336121	-0.0239851344890506	-0.540470338943135	-0.279444173532722
ACTR5	-0.174643561280303	-0.14349187597348	0.326614150823184	-0.237306031667868	-0.240316231586882	0.394438577654427	-0.142590842196868	-0.739839041450714	0.491845681632712	0.0804545168124157	-0.536179825956585	0.448512562181545	-0.256943786960635	0.0869551989254805	-0.164011073155256	-0.549090894271604	-0.537996188948457	0.478143055404036	-0.360234341877889	0.420851983044796	0.170832716312678	0.109691204501095	0.275774246994441	0.121870743041727	-0.207528886605489	0.430561555413867	-0.0632476372162745	0.278435190379111	0.358227767814605	0.504375655491669	0.115132427162794	0.0650408901486024	-0.188525312422703	0.0380276606263179	0.323106041424207	0.372594637943365	0.0255294994279361	0.308234310399863	-0.0829230335230363	-0.240657851659567	0.0380914618506888	0.825393363790729	-0.148750548153984	0.335427875308153	0.249293037558613	0.0529434702538161	0.533781851448221	0.384946206031566	-0.470836352398319
ACTR6	-0.392612242869636	-0.168335528060219	-0.284092403558375	-0.496268431022545	-0.224151173428115	0.216235202459949	-0.463272540776295	-0.664801093276918	-0.0712269506984517	-0.21149609444178	-0.248606776420982	-0.034069030419267	-0.807533999674882	-0.0926404837134776	-0.217830400942796	-0.244934830387891	-0.271704529850225	-0.611105929155899	-0.263747021819102	0.153484476787082	0.243841402550976	0.140225090754674	0.105444559286279	0.252596043619109	0.244225322759013	-0.00669506946364546	-0.181694076156482	0.0587807453377094	-0.132877009128678	-0.154228968633585	-0.178581887421505	-0.40422656413701	-0.0119266027221885	-0.172012146757011	0.0657020754419677	0.174400843478559	0.250671984307434	0.118679127914181	-0.147475194276442	-0.0782598640408614	0.195785711196736	0.0798445923482447	-0.558441932651002	-0.269154923998935	-0.068517460177693	-0.210325533606408	0.120269075011802	0.277306010421412	0.284969852694993
ACTR8	0.137804493494428	-0.178293481793128	0.0921021311696255	-0.133268411248969	-0.334236512344821	-0.195917228314339	-0.100120271747793	-0.458808754193678	0.103524091278746	-0.362524665138559	-0.220855035684769	-0.126272418196496	-0.10494467928489	-0.182774034595565	0.167456507190415	-0.303898765816629	-0.29599686360736	0.0424243140090964	0.43440469920752	0.161801581616137	0.100568220241565	0.214168084962595	-0.177702436600222	0.0554249549872819	0.187357456650228	-0.337349763764889	-0.350199523134475	-0.0564504137299336	-0.0848779850046235	-0.164105322188104	-0.138418677279148	0.0597796320248741	-0.0774827396662549	-0.767520495474502	-0.11875540948108	-0.0818044399205806	0.0526453336226764	0.227719942357925	-0.4205645658803	-0.54639815387573	-0.47564725550133	0.0731125770462771	-0.190502220601088	-0.300828034848177	-0.225713359820998	0.037442654053218	-0.00955484549827796	0.055902256599126	0.121301271626736
ACTRT2	-0.91740746863617	-0.712103572462854	-0.775514925568182	-0.910881634402921	-0.896883400986804	-0.771560927537721	-0.794021803969538	0.276339195320961	-0.785728897924538	-0.667978692999604	-0.690646161580996	-0.971960441685189	-0.751104846380487	-0.668373240773639	-0.961002940216406	-0.824519536775747	-0.835776977421481	-0.826604505304094	-0.915327186758731	-1.22418284924202	-1.2198066625627	-1.20439902749922	-1.21383150796049	-1.22505487568844	-1.01570594026118	-1.00148013638943	-0.997667410081415	-1.22056462383877	-0.850429313932094	-0.70356129253516	-0.899147269088386	-0.816739795791318	-1.01267627939396	-0.986715928648769	-0.92238808185005	-0.979883876739106	-0.922608112007414	-1.2288999451816	-0.960689376300697	-0.963443813649137	-0.962579622570941	-0.729401377666159	-0.60692160293641	-1.13946721467161	-1.01077469224558	-0.87407296577554	-0.933430306292111	-0.968995611681312	-0.781875272326549
ACTRT3	-0.968062898688377	-0.83107714478095	-0.86087299771173	-0.963820452100878	-0.959259913290742	-0.887052430391353	-0.900667034797285	-0.666569766434811	-0.887991062368322	-0.963738793841285	-0.709085901355524	-1.02666632842447	-0.810454837763847	-0.821916678678922	-1.00618594912776	-0.960163612891031	-1.01734533517674	-0.876154839682934	-1.05239419812676	-0.315133341247882	-0.370971340515567	-0.512324377003547	0.909209126268637	-0.379944184417637	-1.12150266853756	-1.22244242940023	-1.06683950352657	-0.344678678805056	-0.941018829288346	2.1388873666966	-1.05457787056993	-0.94903510201205	-0.349351834629084	-1.16237182227335	-1.14754608703848	-0.496955297285155	-1.03768831892236	1.98083867610819	-1.08468838231801	-1.07914053606744	-1.05299494828938	-1.15930013559917	-0.27428570422805	0.384946206031566	-1.11256053968967	-0.995871510455872	-1.00773479789384	-1.09716487359331	-1.08367802852579
ACVR1	0.94009992542552	0.530726773095468	0.540756517786812	0.768048623413375	-0.4215014015353	-0.28930152419357	0.344038325599274	-0.377344353767087	0.118219421294261	-0.77209076811363	0.319600825361579	-0.484482710862344	-0.189159035002416	0.171979656619626	1.45894950840542	0.947080305285984	0.922972305144004	-0.239249958805899	1.10194294655331	0.718431064156946	1.28170598974568	0.751683453647256	0.824920687121247	1.01084692318697	1.72571967310312	0.18023742964132	-0.327922842635062	0.503989376249508	0.253954603899659	-0.407653260963974	0.809134935904954	0.803482138368088	0.656000867593019	-0.414044636852022	0.763637613248125	-0.695697501572591	0.435006882300271	0.49380468030043	-0.326607558199443	1.12967993238144	0.227819553013294	-0.113524948746265	-0.0364257435964175	-0.327357478019901	-0.60728770614975	1.02925774614534	0.412262651788449	-0.112356836918465	1.58674928132864
ACVR1B	-0.746464226933882	-0.715824090294097	-0.704603843973569	-0.524109147235696	-0.610499061208091	-0.98928933286109	-0.474690304466375	-0.505518361368076	-0.811338130749646	-0.0902402223287505	-0.826437868614209	-0.241235377139352	-0.633648228561316	-0.87026760987317	-0.321338082338876	-0.718452447105696	-0.536299394837583	-0.552335541405878	-0.564947583053627	-0.330596112172056	-0.660374708972534	-0.455906633960343	-0.283196136667228	-0.828101329697209	-0.24095031320647	-0.587554815182255	-0.711599038533193	-0.252688683362559	-0.755829567845986	-0.645497580010095	-0.647548210340106	0.175056754719025	0.490295861731196	-0.389628311577472	-0.656548608175995	-0.793243250154497	-0.834281814694537	-0.575741929798977	-0.382545655596007	-0.643866034871485	-0.848784381485288	-0.870080498590527	-0.325781935770983	0.411049756257515	-0.546912997685448	-0.81068230750133	-0.499869138331718	-0.65050159130405	-0.307657508343237
ACVR1C	0.332161654556666	-0.513439804248227	-0.521178158875727	-0.109263695995649	-0.740366794206842	-0.0802292894857642	-0.248844695591442	-0.0475364221289643	-0.431760850172525	-0.131792925430801	-0.276717396167415	-0.609738268572731	-2.03381871545308	-0.0489601621671634	-0.0473972027154258	0.548120297891565	0.601343493189197	-1.19022705269071	0.561564233941689	0.798012919091268	0.716579432068538	0.634038389551184	0.513810247899302	0.744196781397548	1.67359811964669	-0.284247352887086	-0.684598021623202	-0.0862034365233769	-0.333575696949456	-0.161193121812329	0.367204234092195	-0.694997784799902	1.17700642509395	-1.08602154104025	0.806632804422141	0.674568691811315	-0.0802580786327848	-0.293665283260743	-1.27958070386404	1.47498745672338	0.606689834077058	0.173171856893447	0.0462607670916141	-0.40853908098083	-0.373796637690535	0.649052306665644	0.870571619214015	-0.812543163993888	2.22345924391928
ACVR2A	-0.180152164428837	-0.787994410296556	-0.642821900818662	-0.510871077656199	1.33749963012475	-0.93239934765325	-0.855548112218877	-0.658480891821165	-0.662736079913716	-0.310623907112344	-0.336041435532691	0.114784347151499	-0.793616907597477	-0.64663290071396	0.547957295594104	-0.983085143952682	-0.446824651914567	-0.614254111062244	-0.566980842861591	-0.177779031677593	-0.0928699898251963	-0.13044193127155	-0.248698080011885	-0.152716105615639	0.238219342750271	-0.074965681214098	1.12429461648204	-0.133085575506897	-0.398218302767375	-0.343715156958523	-0.717123821674798	0.527274349757342	1.76707986684288	0.245025846216346	-0.496254540789617	-0.290318739464639	-0.142344055584828	0.026648706858388	0.157862935346173	0.0348011640737436	-0.427175011337196	-0.437573746694925	-1.25327501475084	-0.661507922336455	-0.128530500408174	-0.726259655894432	-0.732163488930769	0.494668333898072	0.0349628820151212
ACVR2B	-0.506174075252648	-0.102579971243645	0.0730658044282759	0.164981883082986	0.555152874604805	0.112716405702017	0.157449877022276	0.341207108853717	-0.0648424012463197	0.447282182529489	0.0604180471337274	0.33138562024147	0.342643512559815	0.354489408553032	-0.134266290807729	-0.0102991479842696	-0.0985592670093725	0.372578489031945	-0.377344353767087	-0.504678960469645	-0.358818817571467	-0.335864318747418	-0.665374474630946	-0.486044503411632	-0.227113685219602	0.201650050803054	0.518023130321574	-0.513863617552992	0.181116476282395	0.459322423176077	-0.222946294195573	-0.125031557164552	0.495884150189809	0.325743196734681	0.0483490309588363	0.862846920395032	-0.15072341209895	-0.480396243995656	0.142939254661953	-0.171600256537733	-0.278668736304418	0.372196066791275	0.272326525950222	-0.0708339068118068	0.27649453795175	0.191889481366886	0.190701920319363	-0.156284283014247	0.0596207583577955
ACVR2B-AS1	-0.487470438716407	-0.272077733030672	-0.31872737313643	-0.526506556442024	-0.33699692051959	-0.0810189140356815	-0.384858122770189	-0.197670201023738	-0.292289259324028	-0.206492388894739	-0.210239160873772	-0.318275756187373	-0.149948761945812	-0.255998399435675	-0.423250660417008	0.914955208338716	-0.417456685274017	-0.543365622039909	-0.535722755555491	-0.381173912108623	-0.400098380694009	-0.388640897253822	-0.262612613977644	-0.299630608625333	-0.176959679316476	-0.494042632713428	-0.405595068275826	-0.373286774472451	-0.332826454507434	-0.394545942648237	-0.362221339825869	-0.195854645361579	-0.254921247473267	-0.203723649154258	-0.327090261993011	-0.409323754341042	-0.327758536415253	-0.228561599524033	-0.39563111598737	-0.406408129870481	-0.375815031703733	-0.395235483737318	-0.0646769663386168	-0.132134424006456	-0.360177354606433	-0.210414213523484	-0.381135666499501	-0.397471015655136	-0.445813523876469
ACVRL1	-0.0108467114775508	0.294980385192175	-0.232421436234959	-0.279287949390677	-2.14667988654153	-0.801252926848167	-0.382684097727046	-0.29021728542868	-0.904340905838758	-0.357151312994892	0.521378478415835	-0.669635702407764	1.03638687366243	-0.515929210500382	-0.801452671173431	-0.164612439110113	-0.104476418391031	0.0437929079538293	0.116394066649159	0.49631510871728	0.482356558027705	0.35284090874343	0.583505104221173	0.61221994807554	-0.583285668179515	0.908505056344536	-1.83969236229829	0.889961697869603	0.796959935768071	-0.454857642449442	-0.284746090485062	-0.831309743871102	-1.46400081256183	-2.14663555256103	-1.02603092541541	-1.39992126028599	0.597879428620214	0.570482946766217	-0.494177434198012	-0.724525862259556	-0.99961117214889	-0.772538435572316	0.599790896157195	0.671531393949238	-1.40758774537978	-0.486939744903312	-0.854195232417772	-1.33359962966386	-0.429847985951413
ACY1	-1.20859407676664	-0.990127966097546	-1.06910809207827	-1.17447456303132	-1.19110151668009	-1.03137919010001	-1.05745715334841	-0.846024323921277	-0.978811255493223	-1.03716730461558	-1.00255742431756	-1.10213439685577	-0.452507783269119	-0.972229745766635	-1.2021513870227	-1.11573917446337	-1.09869343800644	-0.369154758237869	-1.15140585481224	-1.41658355842465	-1.40219218795861	-1.4137058441049	-1.42478642539585	-1.4054247401336	-1.2859057656815	-1.29422176400248	-1.3044341057789	-1.40853759346246	-1.12124877581437	-1.04020569165768	-1.16444176948729	-1.17336421673982	-1.32043995500389	-1.25238139241964	-1.22705302355514	-1.27059073795563	-1.17883299554865	-1.42939574924452	-1.26633120831584	-1.26250159100339	-1.25093478625383	-1.0450354785991	-0.0649472609566273	-0.687504890663722	-1.30839109382924	-1.18910177490111	-1.1577320999256	-1.26406472014778	-1.09432475818945
ACY3	0.580832741674403	0.121029442965181	1.38389691685042	0.660119189441504	0.788564341164775	0.336287407164168	0.309760968789458	0.190644969914045	1.24314861886701	0.282145667484327	0.219936290302408	0.239044490925599	0.351634970804291	0.113448223335881	0.571323057254422	1.52821221875591	0.0438895392448495	1.96942380032963	1.81319864080722	0.967058396318428	1.39379062458736	0.817551586138684	0.268106741660172	0.917666666065363	-0.00657007156457503	0.085533252463435	0.333448180716194	0.0892330257670917	-0.0908980820720336	-0.0114351631301071	0.00755306573217381	0.0506448369666514	0.150948314368656	-0.0728870244892104	0.149628283757765	0.0271235037430108	-0.0685850683943736	0.67685275876095	-0.0699151520613416	1.02107872754456	-0.403317048527628	-0.0132671353952133	-0.202321857604295	-0.659899226786036	0.640894227405402	0.0318862757569003	0.729034983859192	1.16888288470318	0.0327841694867333
ACYP1	-1.09800673268685	-0.923769409031033	-0.85898903841171	-0.776200436339536	-0.46472038059907	0.00709516028682758	-0.724840413619474	-0.944852186367337	-0.223992718219403	-0.824404290971484	-0.360925795330384	0.64864826121333	-1.3082682239721	0.275307946443945	-0.400261757734723	-1.11261767276051	-0.643281465226093	-1.56539754538695	-0.595622720532593	-0.113178810232905	-0.218503251269007	0.0970213694430345	-0.277409519670797	-0.622934024180658	-0.0795978375639795	0.116300000684934	-0.313716317131732	-0.171947900973391	-0.37842281318287	0.330029687851295	-0.440371293605605	-0.680221695922155	-1.14369782727275	-0.509308370359239	-0.0351557620607454	-0.0259713875046513	-0.0480316117410316	-0.181980668807935	-0.483501795363395	-0.305334804227331	-0.13466880248926	0.0433137594226535	-1.34627836714203	-0.081557571809758	-0.224709847134112	-0.764473119562373	0.506524688475141	0.401767986544205	-0.249397709567303
ADA	0.190838136413176	0.100440351828593	0.137656716125321	0.0691721831643419	-0.52229365224618	0.00203106601066826	0.570783643269115	-0.0226540064523947	0.141782622630137	0.0662777194373944	0.905049597613783	0.160269592449703	-0.0967207637290154	0.520474764535085	-0.104879726367331	0.00784568878822225	-0.335391592830373	0.635069273621038	0.0977502107381374	0.945679723125134	0.338865870920606	0.812070532643903	0.252128293248797	0.190503788199888	-0.119783216008716	0.416837052305728	-0.302987161525842	1.3247633806885	1.26653026375409	0.734955327353352	0.710416676733071	0.392466745323472	-0.628697158752345	0.315509483098039	0.77240642881221	0.783343923855861	-0.119783216008716	0.699644412903285	0.707949937294424	0.116600580375211	0.382338836920446	1.56219956131993	0.211866682530973	0.231987161440446	0.253666116623064	0.545007653656107	1.42388631780398	0.974408177451889	0.246566840502571
ADA2	-0.149764722581411	1.32406796364191	1.22745823972581	0.244817545863124	1.18147097351937	0.578300452419967	0.976624387138979	0.120772301230586	1.11906696640153	0.248619023138501	-0.256614943430957	1.41134858996946	1.34513101315655	0.535439846334126	1.34111227431195	0.800926667437217	1.06608157053464	0.64891509885262	1.2606504837281	1.00841535676729	1.08538054922949	0.81261647102519	0.145741170438998	0.528637003940886	0.165195452663673	0.889383689323152	1.27158623526608	0.600417851709299	0.795778804038024	-0.0604518757189107	0.402190407819021	-1.42145622440814	-0.497312742193762	-0.701418877085176	0.768414757500837	0.404189691834494	1.06612753416237	1.13967093251467	0.555839984753272	1.49562958269819	0.858439616819025	0.628658723396525	0.23055353776124	0.194617423866609	0.506288791598201	1.63491535189106	0.651780180380459	0.847289177559561	0.782971282308435
ADAD1	-0.896478355926099	-0.836474653934134	-0.911248169706865	-1.00965964486058	-0.966463603267813	-0.83992040189278	-0.938236225248743	-0.713935583292024	-0.854487477822249	-0.846191891029439	-0.824877170767878	-1.10345814680855	-0.916863688048236	-0.78863896549246	-1.09602841559447	-0.976012359902436	-1.01426616117161	-0.944944795198811	-1.04833965865196	-1.33043815957075	-1.31703486901902	-1.32523648882295	-1.36561383810601	-1.29584226245557	-1.15353622687315	-1.14355281416281	-1.07477850990943	-1.329476223083	-1.0549900754457	-0.875223320397466	-1.0549900754457	-1.00469786585846	-1.14825702324883	-0.849760146128183	-1.09651952237867	-1.08126975649619	-1.0532881859727	-1.32345445380798	-1.1374890910218	-1.13316711563245	-1.14457676690704	-0.988188188873336	-0.945136805369587	-1.15018158174919	-1.18797462970837	-0.7622491612284	-1.0308392556017	-1.13728906536245	-1.14791192613189
ADAD2	-0.111000121258812	-0.383417237958245	-0.623592168640625	0.507178832090026	-0.212172360057691	-0.267365299470429	-0.268393400254333	0.22632802174601	-0.472105862025038	-0.133268411248969	-0.161986642203885	-0.859287678531094	0.200563182712271	-0.322496152872792	-0.262891194903016	0.170880978198912	-0.734434626567875	-0.155344513595822	-0.232521949485932	0.030359986622719	0.265851610079904	0.268626274460348	0.479795852870597	0.546424210781164	-0.291381267613128	-0.169524149819596	-0.415874651867969	0.548188627719706	-0.524207328024957	-0.664240591336926	-0.385121903252228	2.7260284403024	-0.359251152932133	-0.0525726800996879	-0.627713590231842	-0.385467981867293	-0.425761613252032	0.132477144527085	-0.359089690696436	-0.20433901977277	-0.32526224698495	-0.690997645129225	0.252706791025633	-0.282591821082415	-0.263626632923688	-0.183068871857656	-0.652603320691707	-0.198876855796499	-0.315720430924856
ADAL	-0.148236247769476	-0.144136689659066	0.0257415635547142	-0.0492522163954435	0.801712348358806	-0.0231112911049583	0.0972653171199723	-0.274307066458888	-0.145331844002144	0.0318072914465524	-0.0851854682276371	0.0291950310551875	-0.00766321204926157	-0.0897065156945205	-0.22513010328886	-0.238899389907791	-0.332386299427301	0.0869551989254805	-0.33699692051959	-0.636916025512068	-0.538247435380378	-0.496153514803196	-0.513661098675018	-0.714468750084485	-0.183889343765014	-0.340950737797813	0.656616699097267	-0.434114485212461	-0.319583360920507	-0.110429920020488	-0.460879254242611	-0.378496986596994	0.372594637943365	-0.448197070197481	-0.113262130751373	-0.47974673042079	0.0836632127400344	-0.62038738374135	-0.113097210640015	0.0223719974119108	-0.11064463139895	-0.0696336461091109	-0.0968994698953805	0.0349628820151212	-0.0192623616131741	0.240433320257835	-0.127506367307615	-0.125298274342927	-0.0103292675531905
ADAM10	0.00784568878822225	0.567927212292501	0.41294665694329	0.409902167046181	-0.241411019576951	0.516156719785542	0.0944530931710061	-0.267695698996443	1.02031963478346	-0.574459257954829	0.566708621607468	-0.350749039344707	-0.623867796416079	0.386242798769202	0.25864001050649	0.365098948624761	0.281490185125585	0.0439863578167144	-0.00867116717114545	-0.468656455394596	-0.262754851090313	-0.832843291318747	-0.412181829441231	-1.09318261380653	-0.232496877029526	0.538291382850365	-0.157233599785403	-0.772538435572316	-0.0449804270623662	0.878575284946998	0.453723500556236	0.54057812261382	0.661965935590707	-0.00380092021721761	0.716098306304605	0.210229342923108	0.420188241957056	-0.421113252120557	0.709948187417453	0.327388287811886	0.490295861731196	0.792760297916746	-0.119014781259679	-0.229972651431212	0.324600324412945	-0.213639702261249	0.574780937264898	0.845885579344103	0.069748091185241
ADAM11	-0.0939781369317643	-1.40998729962029	-1.26114822481811	-0.571938649615371	-0.593018902008369	-1.75109076164927	-0.673329760994904	-0.929317461286605	-1.41650834447011	-0.705763570252602	-0.853721969645414	-0.074459956490698	-0.889656920138786	-1.250278279318	0.971325735331395	-0.56993301766247	-0.706154122353359	-1.23259239168927	0.40738808667372	0.240018513824693	0.0321907417669966	0.0343091635569017	0.0702133927400292	-0.143319378227097	1.11919926903524	-1.25093478625383	-0.839291843852883	0.0375977958007116	-1.08797426774743	-1.44851967962139	-0.998402112144527	-0.0202637281562124	0.0739439356554127	0.237533695561578	-0.990770534627384	-0.616622605638934	-1.88100030393059	-0.292871864548812	-0.955479032047155	-0.282127372498987	-0.265226756256789	-1.43732783951344	-1.27606346837887	-0.651064656074425	-0.5011366749798	-0.329897477286837	0.525182280625271	0.143805578375645	0.423206492640918
ADAM12	0.113303217030289	0.0984297205931321	0.109119397391258	-0.0195994319363475	0.192650180076677	-0.158747017220542	0.0316353563332379	0.148347912354636	0.2115612964354	0.484525297402705	0.365929124558483	-0.36315897904126	-0.0834219940240106	0.401211183422084	0.0191985147075051	0.354198046249326	0.0260719605555984	-0.151234285896603	-0.215252186405841	-0.429074692890173	-0.397026937975417	-0.429668298432607	-0.545759444078555	-0.583054550059684	-0.0544340348076558	0.0675078350357178	0.0875696832652644	-0.526304141492168	0.0818705138323493	0.901852335391992	0.346735550988543	1.34501078395818	-0.140102736942573	0.0914990578820778	-0.0446498190115079	-0.175592830640822	0.927674422318703	-0.417275986978482	-0.0632476372162745	0.00998560098612878	0.117009424150863	0.274165515117306	0.432948638961008	0.0620559658038461	-0.111058258615355	-0.0834851036976772	1.11799474262719	-0.0846524820733141	-0.210032861773757
ADAM15	0.12298759292514	0.183501736889939	0.467809514637106	-0.269720353685892	-0.258414046710718	0.308359954214692	-0.132616769785659	0.544954223378281	0.117005893881173	0.322770448059345	0.00348318952578704	-0.406600066685627	0.61220464548132	-0.151058733407986	0.222591283330054	0.212331455395817	0.100251570740158	1.04781188904847	0.38470805497276	0.234954375952485	-0.0345706871990685	-0.155343726389932	0.367056412430679	0.0279887661331898	0.381897870958164	0.683107455074717	-0.280906347167481	-0.143671006328468	0.222569549604736	-0.062947028408051	0.277107361252858	0.0279887661331898	-0.130870186618499	0.123188604767076	0.147508073530686	0.288366349443317	0.305322088038429	-0.0181234104250211	1.06408700771341	0.389700052938999	0.489672743889103	0.669537463941186	-0.21763733498295	-0.282294807509436	0.475782696771447	0.18608778911633	0.688605013511933	0.616122059932481	-0.089619901180323
ADAM17	0.227256622172237	0.294730293676464	0.149226352331486	0.291024750330326	0.384046397191803	0.453121076295001	0.263937932748702	0.268404071230713	0.264152587436953	0.0323738307684498	0.525058891882175	0.255046259839955	-0.50008982248115	0.0456941454911255	0.00870713103067966	0.206705955899797	0.359249801122681	0.164348850294867	0.248511521074839	-0.373971790962016	-0.125298274342927	-0.373707600912009	0.262500159811258	-0.141178804503509	-0.0949048272806645	0.106322685864742	0.360325220500742	-0.132687205718986	0.262225451381812	0.483210066237424	0.173589602658538	0.626488960296003	-0.0655470451840633	0.503555006197084	0.486228524828318	0.098149745602741	-0.223851014788399	-0.0219763548163237	-0.0414116795778718	-0.13637821494209	0.0835931630218808	0.051375822362562	0.142571608101128	0.0962280197674139	0.042416080088969	0.0448603006035957	-0.020625043923924	0.104981004231133	0.0994159112829222
ADAM18	-1.39044239729606	-1.24052445225357	-1.32042082752788	-1.40004823862314	-1.46339789803029	-1.20567593988237	-1.35679788105764	-1.15014849289764	-1.28527696793851	-1.31208690353673	-1.28240516746765	-1.53227943830289	-1.26453504232433	-1.21902469621135	-1.50712317312439	-1.41275906734082	-1.37611700537094	-1.28448061826457	-1.47332103919317	-1.62445852561127	-1.62305321818884	-1.62344732583604	-1.61184471272464	-1.61888783688942	-1.56858826005919	-1.58308157772963	-1.55549339772242	-1.62733136867193	-1.43238053574705	-1.330174573342	-1.48899464982315	-1.43430764934032	-1.57766068570002	-1.5655532004558	-1.51171528956804	-1.5770229826973	-1.48123910701789	-1.63193436002542	-1.54402796990176	-1.52667927976841	-1.53997720865016	-1.379301974862	-1.16601394893283	-1.47074192131668	-1.57640634944808	-1.46710439420905	-1.51193743386905	-1.54939966355728	-1.55160409409837
ADAM19	-0.454198777429708	-0.744553770830251	-0.841550945583106	-0.254061900159817	-0.540588401940756	-1.05745715334841	-0.577838992723729	-1.11103277387445	-0.814286997875928	-0.584400218157455	-0.232232938626313	-0.987734517088009	-0.910300629780867	-0.230242870977746	-0.722452665917783	-0.765421314159494	-0.910459211464886	-0.685431542057171	-0.982125735544786	-0.87604901370881	-0.833541704513741	-0.769046817259381	-0.86432781817674	-0.941654829336979	-0.724044037173233	-0.388501664530151	-0.590115542940861	-0.751798295418979	-1.05778086398236	-0.0197696264670895	-0.520910892006682	0.46355268877598	-0.736558696415291	-0.0592026815765464	-1.10893846796709	-0.475012836244657	-0.198943798812299	-0.5296063056897	-0.92020982306512	-0.881991679142256	-1.32658351246404	-0.746977916321013	-0.011057870968986	0.0833869265913303	-0.610275431146766	-0.324953668348544	-0.252106104139126	-0.610656874502934	-1.13788511366162
ADAM1A	0.00832362101047553	-1.2199095111337	-0.239782218391781	0.268530130288012	0.499774618013812	-0.535591327783872	-0.955773990848499	-1.66809632578435	-0.42497117439687	-1.2819593901831	-0.281572411739671	-0.254202248753489	-0.459381657335796	-0.969261767919224	-0.0546058626214105	-0.0264068020209802	-0.313403893335915	-0.626037507602628	0.38604094649242	0.64484834937726	1.13626834563386	0.719682294413957	0.0631226349299424	1.01314027328796	0.137625918104638	-0.64399168232594	0.496650367634343	0.711135597070897	-0.707342296543019	-0.194415912069066	-0.519180217074442	-0.0998758730988881	0.131473072774232	0.20931437632503	0.0836632127400344	0.411710256611455	-0.491888381302042	0.44595085416075	-0.252913092177447	-0.139444614861548	-1.08224112161865	-0.156906918924171	-1.32283860094738	-0.638825489465873	0.0544545819786025	-0.756109816713924	-0.373570904772228	-0.196432411927582	0.318468104664762
ADAM2	-1.03078344956414	-0.904701748981579	-1.00560151285059	-0.595108150220992	-1.07822466267025	-0.770028829236503	-1.02175009030087	-0.780117224167094	-0.968391933647048	-0.938503272455863	-0.89088705503762	-1.14957423674399	-0.928298007269023	-0.891167284324314	-1.0976760686073	-0.425810668815782	-1.01995835559736	-1.01073704683409	-1.11471516358898	-1.17718937792589	-1.30012447385577	-1.32138326110589	-1.29806955639199	-1.32778714985751	-0.93422146691174	-1.219402506436	-1.19076342122383	-1.111676929512	-1.10569456589	-0.942046348067725	-1.12124877581437	-1.07226794266873	-1.20565948254262	-1.1717874512143	-1.12720470724468	-1.21168034004411	-1.10949793253179	-1.10777315955705	-1.19522523595871	-1.1854442916638	-1.23437165982231	-0.997008081503288	-0.304534104068998	-0.595736515455953	-0.762678241850193	-1.10878386006202	-1.15159540955709	2.4218326412815	-1.17688194831041
ADAM20	-0.872863554202828	-0.734434626567875	-0.78475624070865	-0.938236225248743	-0.93211326211665	-0.797515551178181	-0.815935331630119	-0.614254111062244	-0.808596097646468	-0.757086848863785	-0.745078174166809	-0.987174733198878	-0.852165748227442	-0.676093869212646	-0.977161342254329	-0.872172754133468	-0.868288769489308	-0.841040704392613	-0.869360881395929	-1.23718755979968	-1.22244242940023	-1.23545980469966	-1.24806276742398	-1.18018742091857	-1.04877004560876	-1.01877846773194	-1.03646413802553	-1.2363877355438	-0.884381095421651	-0.724399623595808	-0.919324529196594	-0.850711019332963	-1.03324773506672	-1.03401914409744	-0.969436563847619	-0.996860612624585	-0.984564098462956	-1.23101763976746	-0.977149142219582	-0.854783449492914	-0.956584010605729	-0.775542411340929	-0.292246907587385	-0.551310056442121	-1.03737845420452	-0.89904541397308	-0.965352218498512	-0.988663961291519	-1.01998765948306
ADAM21	-1.10434547840234	-0.952747978054291	-0.99026456381281	-0.921440866188776	-1.11745830830079	-0.942469228759307	-1.22934728399556	-0.906156890440111	-0.944852186367337	-1.01945589093474	-0.98669283435466	-1.04860967371654	-1.17087057597822	-0.932245186012019	-1.19098143314004	-0.843251895169593	-1.05807726055724	-1.17807075505981	-1.06370646774381	-1.04877004560876	-1.17799280562277	-1.217627111239	-1.25880429980278	-1.26432512468703	-1.27907475737025	-1.27203224662314	-1.22984091367342	-0.971155525190383	-0.87604901370881	-1.01230212590481	-1.1606910608471	-1.15698268847836	-1.19436739663062	-1.1577320999256	-1.21780883302648	-0.897042078727272	-1.19413955485841	-1.20761982310758	-1.33359962966386	-1.24610061935923	-1.2192637976958	-0.823158220337487	-1.10195830838361	-1.3515001494432	-1.30336151941874	-1.07319168735649	-1.04692940892997	-1.26626342237146	-1.2620888921017
ADAM22	-0.500504019682765	-0.49288618961578	-0.521824572572548	-0.433703506052922	-0.333500056164647	-0.488484412100361	-0.548361482661199	-0.434258201534314	-0.390377155256468	-0.27308550574206	-0.343701774077435	-0.389158530629664	-0.735378681931882	-0.617105190834053	0.116058330033529	-0.0694211244686374	-0.549625894234904	-0.614766526151653	-0.37880540574546	-1.03192945339352	-1.02358803550496	-1.08970362235168	-0.973131128444772	-1.12795496095505	0.420480825745506	-0.520024617765171	-0.587766081257885	-1.07841988537874	-0.978959320568242	-0.457262537785341	-0.580157348237492	-0.222436129261229	-0.0103292675531905	-0.411558307568721	-0.388111376442801	-0.685248520059905	-0.374845974201183	-1.10284900680221	-0.467922201810117	-0.462309615759098	0.153189712210504	-0.0694102159551399	-0.669440125848468	-0.713511698908999	-0.586006674148964	-0.748405292569979	0.440576041994651	-0.214703107872204	-0.391954960705486
ADAM23	-1.32066018591867	-1.88253426380521	-1.74638431518004	-1.37694874765512	-0.747908384789279	-1.56762611237128	-1.95119103576871	-1.87556290753317	-1.56198910108595	-1.42780286341911	-1.75213892131231	-0.194132300515665	-1.65709005333422	-1.75213892131231	-0.170447036637574	-1.08033067018825	-1.48784758610428	-1.86721753060008	-0.6228427262912	-0.454692911850411	-0.584643720376163	-0.577568275373098	-0.528508345778233	-0.755829567845986	-0.171232370191255	-0.962737784923082	-0.893417402006261	-0.621171428768907	-1.41681638211146	-1.63375180779244	-1.8458274019801	-0.20073563405577	-0.0701873060979882	-0.56412022638711	-1.12641489849737	-0.632106005050266	-1.17501100582455	-0.686793868383818	-0.848851117404674	-1.16738057378035	-0.933430306292111	-1.56588820059862	-1.27041756758557	-0.404868943164132	-0.987602766730497	-1.94788299539882	0.526287958514214	-0.460879254242611	-0.89082256433547
ADAM28	0.151430189868032	1.20076241370839	0.799516273069771	0.450512272521206	0.46416527276989	0.458516144585837	0.780478610691213	0.96108212489718	0.789594646149055	1.26934615264973	0.583432323313441	0.957997740789629	-0.633737448614988	0.295942261718981	0.824499501293665	2.01053665994187	1.33323225503987	0.0241608764855145	1.27242055162845	0.798925417971457	0.47543012880226	0.207405038134334	-0.0952645631420051	0.530443046918849	-0.925144893598209	0.721207253994324	0.566206485669375	-0.140659616485567	0.315750514207787	0.103611985840056	1.07777162814345	-0.399787513529222	0.697215277988752	-1.01935945206117	0.758845243316672	-0.692790666178225	-0.1377260941848	-0.0299629865132755	0.605183463343988	1.21870620719165	1.39219884436515	0.360325220500742	-0.214954891452162	0.59220433567418	0.484035181527134	-0.731921052214815	0.753379775067595	1.00165914875013	0.330199038722503
ADAM29	-0.778028543827182	-0.667218158201159	-0.786909397684627	-0.831133048249227	-0.814937583897203	-0.688872165518142	-0.773767347831965	-0.530581020327563	-0.75102608340688	-0.649708727655754	-0.616789745214118	-0.926228896118244	-0.724253441319142	-0.639185629593726	-0.922099434626349	-0.174126066512022	-0.853657141891214	-0.787888164207188	-0.858365915266882	-1.20515920139954	-1.19683697236955	-1.21276642545766	-1.22321719242594	-1.18946396023399	-0.972272608870234	-0.952556336046523	-0.912921643524534	-1.18778090117502	-0.85843331121985	-0.655556665431153	-0.853364921399504	-0.759124691660818	-0.184750368615387	-0.949442128301977	-0.884682692210148	-0.952859940395378	-0.869947001474387	-1.22835276873615	-0.925697403829904	-0.921182054777636	-0.919190969588975	-0.702363250585535	-0.589210025486951	-0.984074902047765	-0.968283557725949	-0.652717295346794	-1.01867087746173	-0.92768604127851	-0.969222084800112
ADAM30	-0.819471217656722	-0.683860621188861	-0.793482936526622	-0.855051650187604	-0.837157195807918	-0.725647074293895	-0.793702149732918	-0.571524616059164	-0.730491200676011	-0.651859712422353	-0.652226507628863	-0.926761157467923	-0.635876019258123	-0.648858861823286	-0.881748324886535	-0.74551363525736	-0.852165748227442	-0.781347781390062	-0.916315146625541	-1.17799280562277	-1.18472720103121	-1.18139497840004	-1.1840303220337	-1.18436449488538	-0.990904302369256	-0.964646038386029	-0.933147909980346	-1.16720445479367	-0.887733858664973	-0.397623734931285	-0.913092660188223	-0.785715676281751	-0.901157591631466	-0.922608112007414	-0.884381095421651	-0.954792479984996	-0.902769673814284	-1.19977326786636	-0.939209470114879	-0.92215454057742	-0.964920902433828	-0.797721597555778	-0.247045272413183	-0.716797847555012	-0.975127931437937	-0.84351925810343	-0.964000862328894	-0.966219062156588	-0.981489459160777
ADAM32	0.308910403188415	-0.0548445015237321	-0.428417864131191	-0.0269412342213117	0.594465477694506	-0.155424862490172	0.0156508692091416	0.0831272894268677	-0.344504292091525	0.0924253085409956	0.0397246934613231	0.324321573589227	0.202611349408373	-0.0104512852769011	0.0237385852528699	0.0657897046635214	-0.0561114641961569	-0.134448668877174	0.164256297834302	-0.782296380559647	-0.800153391150665	-0.847430886483663	-0.776421765070802	-0.771229439658055	-0.0163221641640899	0.00247788344994728	0.449107063360243	-0.707050812898062	-0.202648221975204	0.0545783882019425	-0.091465368364875	0.128672839833923	0.180005199098732	0.0964302457458401	-0.00387633659054673	-0.0669500509095999	0.0939911043587034	-0.911534471228647	-0.11513518038372	0.0282002813645043	-0.0350461221205316	-0.079919091271186	-0.115473579131403	-0.314740993096315	0.00891502690072882	-0.0142943900675216	-0.400947285866466	-0.0249940669510246	0.0181629407585436
ADAM33	-0.062416190499323	0.0622577673822487	-0.331613269242905	0.698427354313165	-0.540229597559415	-0.0437334287012259	0.444854528971817	-0.0160432859023726	-0.279141285281722	0.23831900896392	0.488349923566325	-0.279634569388724	0.344658953520892	-0.0182609435599336	-0.599207013962977	-0.0294594185920505	0.386242798769202	0.641968783420197	-0.133909186510796	0.113903905782276	0.450774978043097	0.287064953332526	0.0399454360900404	0.297281732797481	-0.112956766781472	0.297785894021514	-0.275483607789308	0.180435840715696	0.540805847800904	0.269218603223768	0.0740102825787251	-0.417377163018725	-0.289101203867078	0.0744245453666725	-0.0393655450639369	-0.708701538326886	-1.30897982103993	0.563244041244361	-0.60510381139548	-0.852555807755896	-0.362417016722442	-0.307970983075324	2.37287277970703	1.2567023410725	-0.0821366356260349	0.421627477360718	-0.429760870235675	-0.775542411340929	-0.338919083625234
ADAM3A	-0.163591929347469	-0.213278704139061	-0.358956523062085	-0.361481389686728	-0.265046495271424	-0.240524704063595	-0.457769873749605	-0.114475037442016	-0.414823487241966	-0.137773784730816	-0.0356786701839829	-0.279693354268478	-0.308699052353948	-0.261463722134546	-0.321065724838107	-0.288514869589308	-0.472803344357813	-0.41047466712172	-0.434659928842938	-0.956584010605729	-0.987250001670339	-0.979575316256914	-0.952109239279169	-0.911216427287426	-0.378567284695283	-0.399369491968112	-0.304220380761772	-0.804134463880252	-0.430170376852288	-0.198813510292167	-0.355527954798905	-0.262696198494841	-0.171731256978968	-0.254885298387892	-0.250002441792091	-0.393104066250184	-0.430454980302506	-0.983239302784996	-0.375296041026558	-0.334098675785134	-0.388501664530151	-0.323322380066372	-0.0614766666040844	-0.312408386433286	-0.291249424762644	-0.242551834923941	-0.649138151547299	-0.378364318570796	-0.463299128954358
ADAM5	-1.30853419054426	-1.16945196052436	-1.2292194055644	-1.33320167861809	-1.33241047217021	-1.04154948122992	-1.27621031599739	-0.907125561906793	-1.14175284731959	-1.20920968846263	-1.20263819109933	-1.43085192003222	-1.23259239168927	-1.11142628671089	-1.32066018591867	-1.32042082752788	-1.32381689984099	-1.17999547331409	-1.37575677841731	-1.59423050077206	-1.59716651502439	-1.60812140626535	-1.59968738581873	-1.60153066807736	-1.48719693182905	-1.50240475700264	-1.44029230719837	-1.5897374257664	-1.35524074909824	-1.07369504561568	-1.38399312536366	-1.3777789389619	-1.29885771921008	-1.48551387921095	-1.43238053574705	-1.49600334479037	-1.4069247261185	-1.5834724369222	-1.46532164383069	-1.45232032235634	-1.46009679994688	-1.29008688906771	-1.11342284079742	-1.48719693182905	-1.50465860212026	-1.36186674921597	-1.41822323520605	-1.46732038059647	-1.46983938913782
ADAM6	-1.29178021384657	-1.12145390606524	-1.15459374258455	-1.30076237120284	-1.30305217467985	-1.12678005656607	-1.21850165778914	-1.03828357336294	-1.14237341429832	-1.15618967125605	-1.05700435029221	-1.36217497432404	-1.1658248765204	-1.09305653501463	-1.44933951108968	-1.25354039691503	-1.26390853591187	-1.20094558935394	-1.31639351071001	-1.08937854551379	-1.12124877581437	-1.11579828974346	-1.11271432291175	-1.12448365498722	-1.43191495625269	-1.43854368281781	-1.4130397560626	-1.15286886198498	-1.31989670445292	-0.843382071414659	-1.32066372292034	-1.32900075318402	-1.36344807540284	-1.43655088424348	-1.37352850123451	-1.4378426728477	-1.34570787252016	-1.11121123948229	-1.41522627964096	-1.40430272576253	-1.37854811064305	-1.24188242429722	-0.899865286677961	-1.16918758195936	-1.45977322923512	-1.32283860094738	-1.38348081043596	-1.40572574738728	-1.45420045747132
ADAM7	-1.01903746424678	-0.725724161182847	-0.827387989686763	-0.976522766358616	-0.910300629780867	-0.864830400639922	-0.836226880664747	-0.483885349452677	-0.661073424446138	-0.704171173318503	-0.705763570252602	-0.999192494149032	-0.893928000596664	-0.708048390149804	-0.987489885370317	-0.857449420403673	-0.889168379734805	-0.933061556953571	-0.941267566306567	-1.32908589397337	-1.34725460036503	-1.34825935122361	-1.34127043048594	-1.34552085919009	-1.0479900241209	-1.02188998524888	-1.01066934704159	-1.34180656124452	-0.894849170225023	-0.739973871274329	-0.933274417948955	-0.863230178809102	-1.00165707283882	-1.00073879846259	-0.956280891271278	-1.02815307566532	-0.929246353071504	-1.35980066504652	-1.00199392991011	-1.00115697504493	-1.00621862994692	-0.780451163490932	-0.4519704709155	-0.857640759994815	-0.982104420405086	-0.914487658939929	-1.02444523143297	-1.0018077426978	-1.02829332370142
ADAM8	-0.148738724207137	-0.050193938546984	-0.398487308273337	-0.305687765322194	-0.338193344332533	-0.127903009873902	-0.333706620963205	0.132506228047832	-0.283938382099444	-0.0896494814611882	-0.136707674769303	-0.452721565330516	-0.211730507044042	-0.256943786960635	-0.405475959887216	-0.191830050193798	-0.369018272335533	-0.144629827525948	0.262969444986021	0.0475080668386261	0.0982966658299178	0.202228271441265	0.111314804196612	0.879621159933528	-0.252761666784993	-0.370257806348786	-0.315292818886689	0.118982156615617	-0.353400112103681	0.137982270665609	-0.36367687382857	-0.161123824956816	-0.299947983467937	-0.223246177020458	-0.251355115420343	-0.191450222014302	-0.483994545608018	-0.0829962859420243	-0.136506729243575	-0.345797982798479	-0.258665033120828	-0.230827013750285	-0.00908492655544771	-0.158250787726102	-0.302228196065128	0.063471746345975	-0.407913214490388	-0.412913773202109	-0.321448970726253
ADAM9	-0.671270812522052	0.313279730109452	-0.0708601270346256	-0.231744210365723	-0.448786562607327	0.164536330979843	-0.0683105147597529	0.0846930621817298	0.0906962470970532	-0.257822283881819	-0.0493074066077167	-0.137067293719733	-0.383528382891007	-0.0414176263217226	-0.394282093205515	0.136467881877696	0.130632661966864	-0.44384753997551	-0.0773095198346165	-0.202736998977705	-0.475109748968774	-0.682418406461409	-0.285995540344271	-0.663173161253462	-0.481441023501796	0.333553805079353	-0.426166743606098	-0.880868954357941	-0.201899053868184	-0.268863123885408	-0.00627901274954708	0.504150167526316	0.125070321832351	-0.589664848168115	0.104410867212682	-0.00612051785671175	0.181921547345227	-0.504593934618301	-0.16104071049017	0.155765591172831	0.534153890943677	0.123188604767076	-1.25264893388489	-0.341188162535383	-0.325034471681981	-0.606868264863459	0.0325468527016436	0.11621194851285	-0.672563240247857
ADAMDEC1	-1.28659369754181	-1.03339910488144	-1.20263819109933	-1.27406207709584	-1.29939629548776	-1.12411297828113	-1.19228146104394	-1.00593701667047	-1.12812071524003	-1.14146968114918	-1.09139523303824	-1.37217359016092	-1.15334716571055	-1.07313739925788	-1.3126117790558	-1.25582676341621	-1.23907345299754	-1.19204058078437	-1.28215300381405	-1.53619298108732	-1.53420201381968	-1.54550650510963	-1.54177304074987	-1.53222180858559	-1.42327235427666	-1.4271162187947	-1.40979992450317	-1.51666016005827	-1.29480312420535	-1.16863655098303	-1.33101869560967	-1.29972728163503	-1.42545513459364	-1.34040888687855	-1.36287668655957	-1.38034663426193	-1.3547103033748	-1.51833577739606	-1.40387008027465	-1.38982472894595	-1.37728091877354	-1.20780907435798	-0.682157381027924	-1.0100529358294	-1.43689420703712	-1.32223409356122	-1.38982472894595	-1.40164690724924	-1.39605180562512
ADAMTS1	0.0529031834380798	0.869312270060353	0.742717335165383	0.512160526608181	-1.13585725596	0.764949882376538	0.107409891702004	1.94257991582363	0.656510150456523	0.541859470170459	1.61341588122458	-0.382446425295648	-0.0222313709572182	0.570783643269115	-1.20394838906163	0.631843037988446	2.00368610374335	0.766665050539759	0.740874668974278	0.693483766591475	0.0960494561292549	1.46376452082832	1.02034838987269	0.0768891572325963	-1.11644835943314	1.56219956131993	-0.917387357981301	0.200394458111073	0.786554763405846	1.65719732289149	0.656300529230849	1.22145070063514	-1.43378839854677	-0.689321581985955	0.547159766505903	1.04972900155393	0.269462643163223	1.23338424131502	0.796959935768071	0.480008763577615	1.9922626701684	0.916920341526811	0.0616669476412509	2.05573356907771	-0.213920504782891	0.796178150454913	0.250403978320726	0.427078480539644	0.408714893317617
ADAMTS10	-0.37138993615939	-0.226926624861758	-0.807292091468333	-0.0737073261354331	-0.37973592777713	-0.499257393543027	-0.139470539028648	-0.10084795713699	-0.525619658800587	-0.333440290153503	-0.160511073514319	0.285791540882874	0.522426919877948	-0.69464861823273	-0.150517329203739	0.169964623204869	-0.197127681899029	0.341889598863568	0.0789769677466675	-0.314740993096315	-0.317148286829592	-0.10794029882593	-0.386232525201918	-0.435906141880764	-0.403973387942334	-0.479843989849096	-0.23979232289026	-0.127646561384279	-0.438165272065817	-0.313195124698437	-0.368422902354915	0.00300335431183224	-0.346252854167842	-0.0732359887795714	-0.441609089410964	-0.886825211245964	-0.824927577440513	-0.190502220601088	-0.116839316903869	0.348822480977983	-0.216979926000312	-0.684332211254214	0.439667269841167	0.243138429856508	-0.368908945565717	0.0410125060932373	-0.741785556036836	-0.492309042166183	-0.246335475546372
ADAMTS12	-0.678614870291982	-0.562144554055284	-0.624481961511456	-0.683138420566372	-0.731712812399402	-0.575151771410279	-0.608866316572373	-0.452990245563313	-0.562144554055284	-0.455826617331291	-0.509872233844447	-0.795575701580611	-0.457001882333199	-0.461226965499282	-0.797212152247206	-0.630160150324547	-0.645288955441294	-0.601391552146508	-0.628164129651098	-0.788768714028557	-0.766442385390436	-0.741223637705698	-0.769184374192752	-0.772538435572316	-0.820497169344175	-0.794539919370804	-0.825438027729547	-0.78527649934171	-0.656946193205193	-0.51928180549262	-0.678791202073889	-0.637828283047334	-0.815193202408463	-0.752385146541903	-0.707691742812766	-0.749823306384709	-0.606409674788327	-0.787428614299294	-0.772019492682891	-0.7970315611739	-0.766671771551371	-0.493814249811148	-0.571216881605533	-0.855961010400248	-0.836230128804405	-0.484175623390893	-0.29202114629655	-0.774787890201702	-0.760199787165345
ADAMTS13	0.0820471244667179	0.0902383200999884	0.0241608764855145	0.0639569175130542	0.208729695144771	0.0280852833418373	0.333418835624364	0.573351249016672	-0.122905174222511	-0.206848903513411	-0.00477207936471828	0.0517363839298423	0.123116208568999	-0.115873892707173	0.302816729621439	0.00925858437014583	-0.0555561441776636	0.256749852426403	0.0872994368174793	0.488369225025899	0.573484673294958	0.431971402397718	0.305851167905709	0.528006024770426	0.076599833843988	0.215905656956832	0.349100422258943	0.297518622871324	0.585253376973001	0.110729970344492	-0.07076751782102	-0.193821397600911	-0.0676258524688868	0.639017682894905	0.00478295462623844	0.327510516629288	-0.210094535850019	0.176460884360918	0.314822856726071	0.383433744748578	0.146020257320478	0.345586907297527	-0.525687359649905	-0.225517724855161	0.324046594925428	0.207405038134334	0.276188809287746	0.384280730161345	0.32015845683359
ADAMTS14	-0.00810864941656103	0.113448223335881	0.580609968444246	0.0601659274863001	0.320403766466929	0.746470601676629	0.365407439655993	0.253215822273235	0.163404716093073	0.761742019315873	0.332699130032088	-0.300963277190973	-0.0373974650700607	0.129460424619452	0.932369577511046	0.0798360344263395	-0.775322630927919	0.0677087438983593	0.319956024596264	0.211866682530973	-0.184149516722425	0.0667222008673863	-0.318688455598029	0.0395457076065953	0.197861859231871	0.264190316762729	0.310862349382031	-0.331968050400468	0.96402692004352	0.159954797794432	0.736476434307843	-0.748650713937398	0.0104810918269302	1.22807160278531	0.655649678546373	0.869304971941623	-0.108349331914749	0.280531680008033	0.237637552367669	0.387809031670872	0.2244606040053	0.0951117718650479	0.0315184996832912	-0.62820884228693	0.564950458345008	0.304817373921466	0.126737092494045	0.904650383399058	0.315380751188897
ADAMTS15	-1.38391963609521	-1.28839426074098	-1.3777657666839	-1.36120057993243	-1.53542319876839	-1.11346902991366	-1.39871616997247	-1.03179189320333	-1.31031071884366	-1.19453854130122	-1.17643266791292	-1.58272375307917	-1.15695081191774	-1.1557844443814	-1.54503390262654	-1.25475236706499	-1.0561710306396	-1.28788586369545	-1.18531972628598	-1.20869982381072	-1.18606440857365	-1.12070428487759	-1.19896754873822	-1.26396656412585	-1.62076193343819	-1.62043297337453	-1.61725184644235	-1.12820714127016	-1.43812353124073	-1.36683846175194	-1.52014197013408	-1.17718937792589	-1.59050844176656	-1.57287323841335	-1.55425789414669	-1.63459963233246	-1.45287586856881	-0.73243672077987	-1.60745912295315	-1.379301974862	-1.55720783449993	-1.43518565998432	-0.495427870751935	-0.824078211037186	-1.636574246386	-1.3241245501251	-1.56896864727867	-1.58702421245721	-1.57606942263817
ADAMTS16	-0.180861348583611	-0.892408604604612	-0.832045817717952	-0.706379876747463	-0.677426631542424	-0.681149331767614	-0.573297013414048	-0.271008544254934	-0.56132249467947	-0.502413923834388	-0.733140687002725	-0.777476011212428	-0.312670725460696	-0.534087626398404	-0.765956588489031	-0.606932821300514	-0.621105130246954	-0.325317726699501	-0.718621479400208	0.435918860715701	0.533575917349134	0.820050596330578	0.391939732220592	0.639017682894905	0.472088895821262	-0.774915627881419	-0.766536490064714	0.675304893380352	-1.01964660302377	-0.50684538510288	-0.672321019553293	-0.620936379578682	-0.796313622570871	-0.746511097649097	-0.67644774743188	-0.734950548965179	-0.654589819575629	0.438325549368892	-0.747269158237143	0.396057855281567	-0.736670311829108	-0.516153112250627	-0.203957228925144	-0.93642928665129	-0.990770534627384	-0.639341816898456	-0.730650100265303	-0.744777322442289	-0.72151065232468
ADAMTS17	-0.604975740827347	-0.392249972762116	-0.401285628733284	-0.638887438728909	-0.531885983756286	-0.272077733030672	-0.350966149175538	-0.51552748804175	-0.364203040334141	-0.215893813797152	-0.258414046710718	-0.442821405924169	0.52218086856232	-0.429429158230221	-0.344177971035765	-0.608866316572373	-0.109611560106597	-0.0537053684560986	-0.548175512597387	-0.164896260763185	-0.00112469334276957	-0.0873075640640851	0.308101365698182	-0.0576692132058587	-0.229225877125754	-0.72952262927009	-0.534038706531142	-0.320303385548814	-0.0672699341815056	-0.43825723833232	-0.336179502179503	-0.209952253307029	-0.493127295318714	0.195376297293718	-0.577086589692515	-0.891213002725225	-0.860458916308218	0.0188514811053699	-0.647717533856031	-0.626384567991354	-0.368760191982665	-0.37667229451725	0.37447514577654	0.452511260526921	-0.276849874960515	0.648329695976728	-0.622934024180658	-0.567226143364624	-0.680654740409403
ADAMTS18	-0.532116253762624	-0.181927454527451	0.798519531686748	2.17408270537852	0.457143728111322	1.57514561432503	-0.440698787600283	0.346515168811444	-0.368105007250422	1.49981002999813	0.746093525244223	-0.59216093784963	-0.143627536757031	2.68315745975755	1.69117674940328	1.59301024341152	1.01800973772472	-0.497853533677644	-0.567933799394668	0.0259466825284362	-1.01066934704159	-0.944865890780613	-0.165993644509524	0.153757576655132	1.27158623526608	1.95126281651067	0.412062956306803	0.198791169062214	-0.107868148710245	0.803844666750837	1.61862698513987	-0.392188610682655	-0.141098328956414	0.70279130943234	3.63905243904679	2.14586490593252	1.83151224767403	-1.01982127401548	-0.300828034848177	1.86215462402713	0.759213123963026	3.4806237456464	-0.880438651120635	0.658194235376341	3.20292482368444	-0.0528410119679892	-0.580382139375518	1.22658023964456	1.64155905321386
ADAMTS19	-0.476853777091295	-0.262353005974611	-0.388339915236449	-0.38725233616716	0.559674824107918	-0.313831605287936	-0.359037092257808	-0.232036658443584	-0.0531732211928541	-0.0113414991125218	-0.451210247798626	-0.472105862025038	-0.230039617411147	-0.406028198169868	0.131240123331944	-0.65154438267408	0.0751614798528069	-0.259504381604567	-0.49065382125285	-0.537847578685347	-0.453115033060327	-0.646493898595184	-0.578099077765441	-0.493694054587678	0.449280461954999	-0.0920625060711326	0.35128161353279	-0.53236071398078	-0.465015649449847	-0.287815653327318	-0.278109212406965	1.51261214283513	-0.34293518893967	0.538957824489075	-0.450022500222349	0.225123879008393	-0.509609925406781	-0.575651717394366	0.912405412874607	-0.463975296593442	-0.524408170479617	-0.512950325382444	-0.382867231240538	-0.466955486562501	0.14728105681582	-0.397708927007147	-0.317304212933108	0.0535787396030437	-0.463405571543779
ADAMTS2	-0.960163612891031	-0.86509360924534	-0.931607968190593	-1.05978275478127	-1.06234084603315	-0.910222169539464	-0.9235400754834	-0.623524414836395	-0.935136741229666	-0.865940124826229	-0.826834402865379	-1.04511814759439	-0.861186976775537	-0.810257108812953	-1.12752232405649	-0.999192494149032	-0.957827593090996	-0.922358403096493	-1.04770966442593	-1.12157939688186	-1.18034917421293	-1.15836213961892	-1.22442492485556	-0.946544123237625	-1.18089532553611	-1.17280692094868	-1.17391811060792	-0.688877500964706	-1.01077469224558	-0.89401394611805	-1.07748866973825	-1.03630845555266	-1.18892037030477	-1.16601394893283	-1.11550781595858	-1.12611692045187	-1.03724527885013	-1.17688194831041	-1.15166756464417	-1.11024346930847	-1.14590460879638	-0.96867327673119	-0.438521440511865	-0.676258095854238	-1.19759542254391	-1.06357252140565	-0.954273176093255	-1.14701256146915	-1.16481526156302
ADAMTS20	-0.971282628853223	-0.825112715901021	-0.913653673814086	-1.01525224182294	-1.00439568473019	-0.853269232726535	-0.943999366264631	-0.712140830046672	-0.790326921953411	-0.820104004133527	-0.827740328607062	-1.11856693865253	-0.884825623757374	-0.81486026884487	-1.08920457123317	-0.996851983876184	-1.02439484500776	-0.934663335690716	-1.05689645374026	-1.31508333099079	-1.33101869560967	-1.31857666994007	-1.32926556553352	-1.29103386075292	-1.14872324878573	-1.14772083553306	-1.11042628515235	-1.30178349235127	-1.04574435117495	-0.859191986240857	-1.09414204172794	-0.997852233424637	-1.07895241463992	-1.09301869251811	-1.08779328461735	-1.1632354986345	-1.05662786917632	-1.34971578330329	-1.12195116560081	-1.10517604996913	-1.1460646663119	-0.939669266443801	-0.497138095070071	-0.860300691871038	-1.14872324878573	-1.0460358684535	-1.07176823470717	-0.995204510822725	-1.1374890910218
ADAMTS3	-1.09468101847989	-1.74555102128714	-1.98059771178987	-2.66888032176255	-2.86788088453595	-0.991031713829206	-1.41275906734082	-1.67669286271209	-1.28746360489489	-2.02640447026765	-1.88742566601354	0.184003413712058	-1.46863646906285	-1.54814621504915	-0.999085518752714	-2.48416613373508	-2.00747653052568	-1.79056439537587	-2.35108066548493	-0.590898032875277	-0.299725787247782	0.278887918592477	-0.803048403393436	-0.640329896806625	0.0101846633432225	0.353633032021532	-2.58321871802062	0.110364856439998	-1.10721884970493	-1.89510700633188	-1.74658677565104	-1.23473444453779	-0.385986022327125	0.847289177559561	-2.10759409685481	-0.871552225844608	-1.70830374495339	-0.669097787842873	-0.0685850683943736	-1.60490075314765	-1.89165544470452	-2.11755071089652	-2.16766931337921	-0.66326811902213	0.203189050312884	-1.68204872060637	-2.00799719733517	-0.954273176093255	0.562017726991855
ADAMTS4	-1.07642285496683	-0.823782401776089	-0.93414374154879	-1.03320184664107	-1.12760161254012	-0.848502748455088	-0.841133232772616	-0.412369195342879	-0.282264857731345	0.259357646974183	-0.89198377868142	-1.07759434790834	-0.982672900536871	-1.09854930503147	-1.18676518977108	-0.449630050169231	-0.360028940198821	-0.457873584482537	-0.969092057402123	-0.053019268948389	-0.73401413443483	-0.368668658778375	-0.452545008822445	-0.316963735532226	-1.26571269688671	-0.838739608633929	-1.24121686122455	-0.768688226477965	-0.896201028724539	-0.972966918708342	-0.694887301226002	-1.08752443761621	-1.25264893388489	-0.72952262927009	-0.633447411433396	-1.06403016882109	-0.431295414339571	-0.270717365836568	-1.0663099813351	-1.08014461281808	-1.18226563207671	0.208304856183109	-1.17014099553844	-0.615348103585304	-1.09054616399879	-1.29504283578849	-0.398639571613451	-0.071880046663704	-1.02081214378934
ADAMTS5	0.438122309121169	-0.175977950419859	0.385241816590071	-0.0346782926635805	-0.0491882026307407	0.381391591685204	-0.168170959080683	-0.0930218241033884	-0.00919510240815708	-0.158079006980331	-0.181536254509995	-0.768430739040206	-0.557595916704212	-0.00491242773689646	0.0913874459349825	-0.299786150787487	0.468182249511671	-0.0869822288724877	-0.514572775971638	-0.495992200244317	-0.210681070190536	-0.551699181393115	-0.554116095632175	0.00812810257792326	-0.190872802709543	-0.446004282706397	-0.144741949086351	-0.229284375078585	-0.467998689910279	0.0180249983744736	-0.177562361491824	-0.132569987029912	-0.426091090397636	-0.551828092798065	-0.197437895105303	0.206708714393581	0.684108716947288	-0.372873719155895	-0.583510772720735	0.131559097116787	-0.304220380761772	1.93163169082363	-0.182922364806484	-0.805159224698093	-0.600447258394278	0.421003819597171	0.707949937294424	-0.309572389081967	-0.338719805909136
ADAMTS6	-0.434659928842938	-0.161986642203885	-0.401790738236537	-0.528235179847354	0.136731158648077	-0.29812431335896	-0.530258852706463	-0.32284532425087	-0.442243431182754	-0.246986447475668	-0.0990182424677418	-0.62545026307687	-0.19916583791216	-0.229605850193929	-0.495682080652224	-0.115924797577827	-0.271635801378403	-0.405475959887216	-0.411933748327434	-0.678919904131355	-0.942810519114883	-0.94328846116484	-0.933903237195675	-0.745399421418439	-0.132488169529891	-0.529433936075699	0.0433137594226535	-0.873623539119257	-0.502969798146105	-0.339259826975878	-0.472939304146033	-0.446768294913893	-0.132877009128678	-0.503531643573097	-0.543627378943845	-0.496695393774873	-0.131917042537616	-0.729021288904969	-0.557417526882865	-0.504329911645999	-0.651283068957029	-0.472461435378104	-0.284685098046422	-0.5300006795573	-0.473743451419408	-0.151954585912987	-0.578654824207792	-0.332579114688667	-0.573272620239771
ADAMTS7	-0.401285628733284	-0.436791003837418	-0.541084141624691	-0.485457219299543	-0.541392622853128	-0.419721369322051	-0.452624919848156	-0.0872077111457656	-0.448591768509612	-0.304337071679537	-0.37394217287756	-0.652905437677673	-0.0632074034111146	-0.449270618009396	-0.626960314425916	-0.381516812544522	-0.593457763244666	-0.230555198477477	-0.444027234650451	-1.04754171707249	-1.03705296548422	-1.03418321574128	-1.01732776760101	-1.05744283441198	-0.528401036779496	-0.574243963431823	-0.549069678367857	-1.08400114476487	-0.43825723833232	-0.250431928072963	-0.552053860047392	-0.360626385753105	-0.549694374334025	-0.349511444644195	-0.522207794046927	-0.604098902212268	-0.453268976439055	-1.0460358684535	-0.537753834380013	-0.433638165643732	-0.511963895693976	-0.385050967210901	0.356236430721522	0.132619204374019	-0.577086589692515	-0.410503151997447	-0.515212222044929	-0.481078637513121	-0.528401036779496
ADAMTS8	-1.00158617551795	-1.52052948983876	-1.14129365977405	-0.870387272447138	-0.392756265821805	-0.836705410150078	-1.31151315467728	-1.6268983877422	-0.777747308335231	-0.732826795511759	-1.2292194055644	-0.894067788091615	-0.657772649168913	-1.35617766419175	-0.162475368088156	-0.78526609922509	-0.718101241455881	0.104191449194522	-2.26225416860359	-0.227780419895271	-0.172330505997122	-0.272514248577451	-0.0814164512878712	-0.149952484937788	-0.802766503405491	-0.887122509976316	-0.658143709061277	0.0717944542740552	-1.09840457648669	-1.22167913932553	-0.861968652943579	-0.542073269447303	-0.616488060436377	-0.266204274316619	-1.21745488900816	-0.626059434623421	-1.39474050364459	0.446313960340356	-0.780578492546812	-0.919064233142121	-1.26847494416897	0.00186410394390976	-0.616847649866344	-0.522991837709464	-0.508107813779727	-1.11061947278987	-1.16270814749456	-0.883731659385433	-1.12857309103406
ADAMTS9	0.296224674556451	1.2942200457082	1.18027364445305	-0.239917961387294	-0.259652057404012	0.773345318346448	0.0822826624042547	2.68315745975755	0.074820118252294	2.28215501061569	0.803318943068741	0.256508352000988	1.02243919017399	0.770362015403692	-0.384920740858362	0.471966914254018	1.69525861656922	0.0198419506840829	1.55033354886494	1.29786033942074	0.0387604465059786	1.12855451649453	0.850105016366534	0.0202057006800029	-0.346332412058235	2.2163122401807	-0.189536515908681	0.023331427898461	0.804348690835771	0.774180995802487	0.613320545636257	0.911155358823602	-0.573382345484727	-0.315720430924856	0.561770890380974	0.974408177451889	1.30131202673943	0.289837456935026	0.870039501735046	1.01249330354919	1.69723963806722	0.050390959533486	0.164322361591505	1.09629192843819	-0.293053245790225	-0.0272875927573911	-0.672195346291506	-0.283610873122533	0.906543219206702
ADAMTS9-AS1	-1.25280440983242	-1.11381948761122	-1.17999547331409	-1.32192990419887	-1.31184099095775	-1.09854930503147	-1.23259239168927	-0.765956588489031	-1.15986568828986	-0.869749695492552	-1.16528927767215	-1.38179064057096	-1.17763052195899	-1.10767888896582	-1.36985261703085	-1.24382853203558	-1.11292009736305	-1.19401256662651	-1.32192990419887	-1.37820947083968	-1.47601285883313	-1.20343923944119	-1.36641611843776	-1.45332198410299	-1.45210806599935	-1.46009679994688	-1.42044610937751	-1.44331881405751	-1.31676109076363	-1.18733588848172	-1.36934504997413	-1.32471026240378	-1.42478642539585	-1.42478642539585	-1.39708621235108	-1.33843627227652	-1.36683846175194	-1.42917608338384	-1.43280752794066	-1.40903371196282	-1.42020351021767	-1.25503400595426	-0.928841465422467	-1.31719004680897	-1.46160561958745	-1.34392506038696	-1.38165579448303	-1.43238053574705	-1.42963999528823
ADAMTS9-AS2	-0.300532719844215	0.310407587199558	-0.37973592777713	0.269521766601943	-0.548983456315484	-0.169480311724216	0.046585838686128	0.859646153660584	-0.279976251018531	0.0976606803369803	-0.293593646465798	-0.524602353730211	-0.15692402649306	-0.343271187629305	-0.641351379571549	-0.454613708342448	-0.334877325626197	-0.400980457139905	-0.817885287679068	-0.819097872687348	-0.878719540042332	-0.749687341758045	-0.798347005703048	-0.899322542383469	-0.858622459307429	-0.604905401273931	-0.574243963431823	-0.854783449492914	-0.471470284831925	-0.155078734242664	-0.162646729203834	-0.803193856236925	-0.704433960298132	-0.49563003787421	-0.525989933904969	-0.783613605927286	-0.380017050812472	-1.01160498191068	-0.845823438489951	-0.541176010082246	-0.192255211891811	-0.687392974052344	0.522398620965471	-0.490076377906036	-0.88109903630506	-0.513748215318358	-0.132360094340561	-1.09283109393459	-0.598108896722099
ADAMTSL1	-0.811784662847962	-0.80692011492454	-0.8128332420423	-0.869583606341983	-0.578201384889896	-0.594464994044459	-0.872696129108454	-0.632059504139346	-0.864936655404389	-0.540328168923771	-0.793702149732918	-1.0608387175255	-0.689814581886752	-0.839812459985004	-0.955013248517496	-0.838848066140525	-0.99791089097579	-0.680185569049235	-0.618312193735492	-0.89447453343077	-0.954116054233552	-0.918446902659616	-0.946053651589117	-0.93892661863509	-0.827121585641102	-0.959230615992464	-0.565737237048545	-0.959772746366902	-0.870221467513126	-0.683233412765593	-0.96006861118159	-0.500765320327988	-0.740846014439298	-0.946254843772572	-0.954116054233552	-1.01590519394347	-1.01066934704159	-0.749037363297659	-0.709831126393181	-0.928219063348518	-1.02093881467917	-0.706062630114608	-0.474933454212015	-0.826458289008981	-0.986928380676729	-0.787043189299754	-0.743271651804165	-0.626608930336781	-1.01431198491454
ADAMTSL2	-0.221123827080176	-0.248004212835947	-0.26103794551462	-0.214640366914761	-0.210697114380027	-0.28770106970671	-0.215628123946342	-0.0868126335523538	-0.233679938266835	-0.125570143853496	-0.134317188586725	-0.239652009855736	0.733906182500495	-0.548726130111198	-0.297424051038009	-0.161306382086191	-0.238257681149613	0.500762052510455	-0.279287949390677	-0.359979548706933	-0.187184754735359	-0.122572317444798	-0.263699828292225	-0.344851016684053	-0.215857036829186	-0.139835451736658	-0.159527457466487	0.832621097863395	-0.177303031389334	0.00644176175328878	0.14734177898764	0.102983452566977	-0.155659064089007	0.186469652605854	-0.157999312120907	0.260807538964722	-0.184832255030287	-0.100141397011135	0.183186909238215	-0.137300411636684	-0.189830490029278	-0.295316589366104	-1.38810910323302	-1.10019521801208	0.0555126801206712	-0.133247222047657	0.799362405138108	-0.103769409745545	-0.196789680905876
ADAMTSL3	1.03219067027626	1.47620190316615	2.03379094248158	1.44731803426544	1.33323225503987	1.5186122874021	1.15031980139985	1.31672407213628	1.67866511300685	1.07186623293694	1.25062152280788	0.0879166412452093	-0.797515551178181	1.14331614468823	0.976624387138979	1.09561078703965	1.32566068634362	0.365569617291152	0.883656307786448	1.17123073620171	1.30897308093416	0.977342040442535	1.00735289890688	0.938770173713424	1.21425804916865	0.401929767264869	1.22939474048775	0.414013593733745	0.680278725073846	1.61862698513987	1.24815586878239	-0.598396708415313	0.391082315183612	-0.572710962369138	1.14775326968427	0.194050939064343	-0.259682320028194	1.31755289487305	0.918405538776145	0.975947500991922	0.263601300007212	1.00469957436512	0.0924249458105569	0.284742074522693	1.17012723623045	0.329766754079411	0.356658204075781	0.944902648130888	0.751683453647256
ADAMTSL4	0.190884217875072	-0.152415156489656	-0.0776028725064803	-0.0832066697122263	-0.417196283144625	0.219160495926595	0.182906142881309	1.47186484700531	-0.358077927951538	0.678131133030199	-0.286816476830523	-0.543257516923386	0.290424373837818	-0.322410017048058	-0.518214984040339	-0.355424348561826	-0.390377155256468	0.00126715954040923	-0.479353926598935	0.621981646668738	0.785563902506772	0.732398775538112	0.777762395927311	0.705829893588699	-0.395543500836994	-0.338407700282597	-0.34293518893967	0.441329040600152	-0.190575414859628	-0.210094535850019	-0.186090361778668	0.536188033841828	-0.315379182728558	-0.249757720106082	-0.380769828403416	-0.340182558552252	-0.183068871857656	0.400485279765362	-0.284508832562131	-0.34412282273897	0.808083196025461	-0.29793299886178	0.0985303138897735	-0.015033019644922	-0.371670756313352	0.0169899046770919	-0.469677384419033	-0.39563111598737	-0.405450296528887
ADAMTSL5	-0.0298055460623421	-0.238814994833859	-0.779667840982562	-0.0967878123473771	-0.272956676003759	-0.114421303160415	-0.030518295099218	-0.129229355845067	-0.278717755749008	-0.107891658324898	-0.182982619068013	-0.371722305867473	-0.000834453105205557	-0.0945392460292672	-0.367577446506129	-0.207894648163861	-0.317455610296256	-0.0880488044582043	-0.329376742757871	-0.753521394733158	-0.640329896806625	-0.634572239124406	-0.678018762927442	-0.589885862061763	-0.313973963566491	-0.338919083625234	-0.345797982798479	-0.626059434623421	-0.295712380075795	-0.198876855796499	-0.318985120387641	-0.266204274316619	-0.405688868600943	-0.302228196065128	-0.286846636157564	-0.348208271096453	-0.298271606979282	-0.6480394155105	-0.36176321730631	-0.351445125603792	-0.374845974201183	-0.232836321524264	0.345490024561999	0.427281506776016	-0.378567284695283	-0.267215945660691	-0.374253243813102	-0.346916449903833	-0.383055285128766
ADAP1	0.0368443805053498	-0.756042196130328	-0.604431370792111	0.120372087713409	-0.248773974499057	-0.689547223243678	0.00527392369604228	0.0652043251667625	-0.529751326540672	-0.177192298918825	0.057904453399128	-0.657865860098816	0.114530920229392	-0.277881829305205	-0.436973054106617	-0.67945098705114	-0.757933210608639	-0.112999498347157	-0.399122523403045	-0.024485190422628	0.0846283730197419	0.215563737847456	-0.173167357577134	0.0523396004162987	0.285519290612286	-0.271386957556192	-0.204413509317172	0.41488781970856	-0.117971892085643	-0.310866932530943	-0.388893781526003	0.326634648602897	-0.485063743460329	0.0589292801719216	-0.266504265987381	-0.00810423029461378	-0.466955486562501	0.139963129726012	-0.352542470969994	-0.620161517195165	-0.401376737417041	-0.0702457252016886	0.104874300337148	-0.0297445215533409	0.243530958352494	0.314569956529331	-0.158074697926653	-0.0679002032961826	-0.0868965423001997
ADAP2	0.281897763727037	1.10794495837617	1.01375905863773	0.283678033724357	0.873834056032642	0.316697375510166	0.783050555138739	0.00662004208648509	0.704508915115262	-0.436653479255064	0.855815359635486	0.716114036419715	0.217345834668331	0.321689615521201	1.05078951459519	0.651663388220807	0.823956143931525	0.818177330188969	1.35506778673516	-0.177702436600222	1.11341855591955	0.670830502569303	0.126403870213518	0.607234840044704	-0.538247435380378	0.481965630758782	0.901852335391992	1.21589178643601	0.876449748876806	0.326194595366431	0.842744833608687	0.401270021239532	-0.430083668894577	-0.0204809970862487	0.737336979626887	-0.441139972778552	-0.0668791544495216	0.891418316550139	0.0383090105998657	0.65786396680833	0.335578900718042	0.317043855243255	0.429895012538487	0.065631397290539	0.684108716947288	0.393655839501233	0.534153890943677	0.735333752524241	0.39437896679141
ADAR	-0.0702950756565273	-0.197198711797382	-0.239728469660546	-0.0716404340725083	0.0516709057396964	-0.274427924447231	-0.184856364979186	-0.187990299198496	-0.261114280291737	-0.0647734929388356	-0.24337875487804	0.107168381436473	-0.0832066697122263	-0.213862963171929	-0.0338583273355166	-0.415645842606567	-0.0314696730123776	-0.167256836863405	0.0309936332530786	0.123788269519872	0.0482113963688202	0.126832934670026	0.0206295986273074	0.0558110044480396	-0.0478118292011288	-0.03248903776006	0.150007935889115	0.145837425830827	-0.04985593449208	0.134170336378709	-0.263384520380338	0.217970623239762	0.263264324282053	-0.168653599612954	-0.260794559519655	-0.146542612548889	-0.146217434502106	0.104068342127532	0.023145449125202	-0.0659893055192128	-0.297680450214874	-0.179524058167819	0.101916604281284	0.257802110769146	-0.113656074843514	-0.329629990324581	-0.215766407364865	-0.278969865636164	0.0196361222079079
ADARB1	-0.439192172185976	-0.489045542589325	-0.62746356054745	-0.469005571364305	-0.44664587948512	-0.722814567376738	-0.487007212697701	-0.297886978323623	-0.65986013722727	-0.475794969743406	-0.510987543268495	-0.49506473267373	-0.350492391132991	-0.677983192186181	-0.596606531366587	-0.59594392091093	-0.331752430718985	-0.515350186193163	-0.693649482296448	-0.571022657745793	-0.632505231798522	-0.584303548643182	-0.219259962058547	-0.49563003787421	-0.355294153409726	-0.483700975380591	-0.457455225928572	-0.614902111621478	-0.688598484453258	-0.356965020223204	-0.591554991882356	-0.190655712145312	-0.572710962369138	-0.251242050523163	-0.498000223030262	-0.409530148606768	-0.403883157971554	-0.731577288879949	-0.586476962312655	-0.232717003217699	-0.544315161155108	-0.586476962312655	-0.320518951847108	-0.550178303642608	-0.551099070525127	-0.217841152950963	-0.298201098747948	-0.570893414582147	-0.302464877844163
ADARB2	0.83585837792421	1.25613542178641	1.12882298293171	1.77425957493067	0.41294665694329	1.04335814774838	1.1301622477106	0.417811108145378	0.980875227197696	1.70998679710146	0.673790937062356	0.729645133536214	0.521378478415835	0.934194671248377	-0.18838827564779	0.898338291669734	0.698427354313165	1.35132992944111	-0.912230737824076	0.0851549759932401	-0.672321019553293	-0.155532436215269	0.167237788074014	-0.0879045609942745	0.495172770522717	0.276623318986572	0.552404236788206	0.448532683603792	2.32857355114689	1.00315818971626	1.25950322916737	-2.07348857997064	-0.616957595571015	0.686308285559808	2.04838392619597	0.915061402721102	1.48998174382295	0.345000401336061	1.11699377872739	0.342726646223864	0.977342040442535	1.12967993238144	0.685949654758014	0.746716218201639	-0.106682605230831	0.498857873492414	0.974408177451889	0.591121641351627	0.222569549604736
ADARB2-AS1	0.854678429789975	0.539262956050025	1.11631623813666	0.681771414997333	1.11308191067072	1.28630684376852	0.543064683238507	-0.233920575285729	0.912558712163711	0.891121494495361	0.581621430703663	1.34837802352838	0.492793449994621	1.32406796364191	1.08338038234366	0.73847403489846	0.766156896662949	1.0038023334298	0.71231749113285	0.317154800222877	0.218474607562784	0.238219342750271	-0.0550361158831782	0.336611402882914	0.879621159933528	1.38856383109064	1.14324924334778	0.177601375914575	0.84110684463872	0.21580667428756	0.616776570211317	0.569604641887082	1.065203982083	1.54508983523162	0.721207253994324	0.793701775660729	1.02538384913645	0.175500736713964	0.863965909696848	0.867102966200088	0.683763213551817	0.411389691819857	0.178435783721344	0.944902648130888	0.923845202899156	0.61793729063867	0.518400122741986	0.81318759072974	0.965702879916032
ADAT1	-0.800864842437141	0.292718988097327	-0.164665291911171	-0.0613463675689799	0.481343715387993	-0.325986649741296	0.0665339695889304	-1.64587716702331	-0.0977586884927891	-0.12770687021835	-0.266885484892502	-0.0199107434008554	-0.391264156824488	0.0312623675790626	0.0371034947735621	-0.505518361368076	0.0937391803110925	-0.273652457017506	0.239520343868004	0.0777781685225483	0.243138429856508	-0.0950448538124432	-0.139608044007063	-0.124202373887359	0.358734985045007	0.0686453866853159	0.49569233250208	0.0681301137710129	0.427078480539644	-0.0939513461636147	0.13397876926764	-1.41396705971406	0.320013455009853	-0.0724866635476744	0.175332368299513	0.132553858554838	-0.0923210996478736	-0.288868172063981	-0.535479803979641	-0.840037494991915	-0.220828567022531	0.365871434390786	0.226824275353712	0.752171979158202	0.265416675003893	-0.233203740637361	0.0383090105998657	-0.135617227982712	-0.053019268948389
ADAT2	0.188767564252247	-0.123747898369373	0.530726773095468	0.172626506406218	0.292845495882631	0.211339367767423	-0.0320447159656141	0.238937967068413	-0.119203196162424	0.204134097748103	0.0529817579678939	0.0744420516224952	0.0518226145786395	-0.163772537614024	0.199668982481874	0.114898221094168	-0.306802462838199	0.0572233525785363	0.180105896109747	1.14986083166331	0.901852335391992	0.791687042030046	0.608096694331145	0.963340849310494	0.770657232065205	0.0625984750143389	0.303495971902071	0.740905953147004	0.177164026692187	-0.0322052708978561	0.0183668004093591	-0.279820220718593	0.146601944022339	0.35703075292325	0.0754291716761159	0.143222377951776	0.43868259652388	0.772785663052373	0.142340536317204	0.225123879008393	0.290610191174184	-0.0212803946322079	0.0418008369959633	-0.0563164878406924	0.259665641055048	0.227094400105155	0.200309735725113	-0.0870198084765416	0.588948346527846
ADAT3	-0.260017909414586	-0.479950092276101	-0.368405841133498	-0.444027234650451	-1.30336346471925	-0.25734024325664	-0.183869255729959	0.380699746360698	-0.255852717741162	-0.250550695731	-0.229072849048426	-1.0649106124034	-0.0457958063234815	0.335213812490571	-0.826252512789563	-0.228539079474053	-0.481204444436896	-0.1859975195218	-0.410526443994708	-0.166409961170006	-0.08856188085899	-0.103769409745545	-0.108630973061536	0.0485405355624899	-0.863931022040185	-0.474933454212015	-1.40093215015606	0.170422900493507	-0.25547804651561	0.0640652238043972	-0.0962529165982826	0.378940045017038	-0.840166962267473	-0.717647579372048	-0.40231524332411	-0.272600490776264	-0.423080221802622	0.107098769414676	-0.477821931205686	-0.505757531008917	-0.296752204211016	0.0339297824031778	0.219994828444735	0.136874660061424	-0.550982929339349	-0.154471381395103	-0.144413676555941	-0.285412625557203	-0.847888264982553
ADCK1	0.0909323611498158	-0.441943970832014	-0.657631468969969	0.0276378041845134	0.394070215003264	-0.194456103749669	-0.0932347529933272	-1.00039781058339	-0.202562029018619	-0.331207434815568	-0.350966149175538	0.00136045798727784	-0.281427890007627	-0.0341155883904929	-0.258928492514783	-0.307195756401582	-0.164227962463971	-0.0503464504575551	-0.270737828823021	0.0876961031155621	0.0850758874583524	0.29809540416354	-0.0706974660353286	0.054509825123566	0.29475392888574	0.271205511219551	0.264190316762729	0.326483454473986	0.365709984504939	-0.344851016684053	-0.104957353889441	-0.891089864210155	-0.409876989340945	0.0842275237447682	-0.0197696264670895	0.250590632474592	-0.548753087077388	0.36989175375289	-0.532578775960451	-0.284594761535802	-0.447691076596777	0.10276665608358	0.331412681981072	0.701507143188518	0.254187489193215	0.134826024357181	0.107735811986889	-0.133247222047657	-0.00456423765194396
ADCK2	-0.541084141624691	-0.49159418977507	-0.46005303392268	-0.392688494397062	-0.259395812432765	-0.366507031001608	-0.352745095378496	-0.455008451228965	-0.479278608971588	-0.554049439024698	-0.226275088472643	-0.187019033916096	-0.615485138063739	-0.214302008367224	-0.369611445111136	-0.609961185373576	-0.588550923576619	-0.411761317613032	-0.452330395303743	-0.17566251849902	-0.283196136667228	-0.0872405948048856	-0.242604791841957	-0.103034294992099	-0.382635649083843	-0.409530148606768	-0.298201098747948	0.113124564208301	-0.306892085255268	-0.0679002032961826	-0.59386916972775	-0.457549991670671	0.24411913087489	-0.242270373793228	-0.448378396202738	-0.238513047629158	-0.0290928599988454	-0.172530625425174	-0.227936328600377	-0.419884281994441	-0.45045171120793	-0.167031589643009	-0.57208576969949	-0.322214180200816	-0.351445125603792	-0.702594292217221	-0.251596451913516	-0.157153388128444	-0.402682314277333
ADCK5	-0.163833085325762	-0.471840401490858	-0.686130289066528	-0.189060281168141	-0.603398550993477	-0.485027460919799	-0.450413095096355	-0.401790738236537	-0.490725965572694	-0.448150167284068	-0.701420863435308	-0.509390785926477	-0.0640537652415564	-0.478854912177698	-0.484959300171513	-0.820536566328635	-0.568869920368728	0.235233480483003	-0.0432134667837037	-0.0242842564201269	0.0672746009290843	0.000153616503861775	-0.0728870244892104	-0.0607404203667847	-0.623332376470946	-0.715255721470327	-0.555305399545837	0.184992657159841	-0.475109748968774	-0.351713123526471	-0.762785841645506	-0.44611617309523	-0.611829522195589	-0.54480031608314	-0.637332470047098	-0.670819309323917	-0.5705746707016	-0.0113053713637438	-0.561050647400192	-0.686544166387859	-0.568514935874308	-0.385209850133671	0.101830522167993	0.265966208824602	-0.51655496134087	-0.473025321939331	-0.546912997685448	-0.136172503675634	-0.730395811638861
ADCY1	-1.07890156875799	-1.67753900971247	-1.53040082088382	-0.693753715175457	-0.195120900837008	-1.5777435083477	-1.3336239388971	-1.20094558935394	-1.49864643440079	-0.78351000613128	-1.53594668112682	-0.375389645879772	-1.47677536355422	-1.44822964899302	0.1822326320418	-1.29202134698534	-1.14796607821384	-1.43941593553749	-1.18817121040757	-0.507329237588667	-0.736114133624328	-0.826329114260781	-0.585125260566199	-0.976086192323873	-0.67849112231668	-1.04379453422081	-0.326782578065783	-0.749687341758045	-1.48293719886146	-1.54743893780936	-1.78128324635653	-0.350290811740381	0.0880321557812605	-0.802030193595938	-1.19644720917516	-0.776649656692521	-1.50028824237183	-0.868321748536118	-1.10414540434658	-0.776166852369082	-0.511505999042489	-1.27719457320827	-1.01407974151416	-1.17501100582455	-0.94197187442362	-1.7334255401793	-0.79987876656195	-0.35590402688444	-1.1232642917911
ADCY10	-0.557867716314336	-0.41133331477642	-0.575788926642883	-0.583774091095315	-0.468548400432722	-0.401657673094673	-0.462813763696051	-0.0848085413810894	-0.445232130506633	-0.352390458327097	-0.352953243234923	-0.65079181131084	-0.427910792228739	-0.404009198890262	-0.673942747814655	-0.445232130506633	-0.567048072149494	-0.589488479083837	-0.633737448614988	-0.794195207987224	-0.754129894813059	-0.729146742912971	-0.755470400649056	-0.686685171302848	-0.420790943489008	-0.599244339124475	-0.543314263467427	-0.71919812231319	-0.497501384304345	-0.330889579118066	-0.624208821223847	-0.439931079115058	-0.400213020184499	-0.296845173580846	-0.539680749929497	-0.564611221468834	-0.561050647400192	-0.784484870884317	-0.589458937531531	-0.566740701688624	-0.610372316915986	-0.518887762349947	-0.27788355257231	-0.356201301453998	-0.633696587559323	-0.0160712457881724	-0.624418381077297	-0.614793565958207	-0.656413059978656
ADCY10P1	1.50301545413365	1.31997462743809	0.873136424434539	1.32406796364191	0.00534676247575059	1.1170951316427	2.08369422121828	0.476278884927454	1.00681793601961	1.15634233617004	1.33855535036224	-0.566026963804417	-0.394761337688465	1.77805054396714	-0.89435540991291	0.299250199203925	0.896837929454922	1.49981002999813	0.205528030689376	0.0760433364486439	0.0587807453377094	0.283028847435269	-0.401110345403496	-0.610656874502934	-0.537548204389004	1.11614484778526	0.252233417543696	-0.197366710290346	1.9383688955422	2.7924297775653	1.31037361018246	0.505600148102015	-0.601181480079225	-0.608689073074329	1.51786067841567	1.49562958269819	0.0762614918100557	0.4461132187579	0.622350287557866	0.999127255402424	0.688366702174795	1.63491535189106	0.471382683685268	0.648329695976728	0.926988441074409	0.272974514010385	1.40136795431765	1.18176719456463	1.26087483796984
ADCY2	0.256749852426403	-0.0135883500642649	-0.00574981241503153	0.00621988214333024	-0.154775208069609	-1.08160244774618	0.188938401999464	-0.792588836474372	-0.227650048557311	-0.454263995610856	-0.497603223364547	0.530468375037881	0.271668752996453	-1.72842744517301	0.70787818375858	0.704822600302959	-0.0618538494114078	-0.0275581221923453	0.541667576013398	-0.0603799019017383	-0.142622690088858	-0.419144118318686	-0.168953045435425	-0.571682219865056	0.667717837302575	-0.632413412331579	-0.239647995095435	-0.232558661117652	-0.532273756010414	-1.6226669750615	-0.317690111745975	-1.04020569165768	-0.179680177360672	-0.284746090485062	-0.669688107544004	-1.1249535684054	-1.19522523595871	-0.46375411840225	-0.0312328429505756	-0.957031181312692	0.221016286113086	-1.68636664969304	-0.441609089410964	-0.641997590820797	-0.660883742138397	-1.50711323108815	-2.37914307521843	-0.392727134705852	-0.832725597008974
ADCY3	0.403022638421111	-0.206776954708535	-0.258866328162467	-0.0303156454841437	-0.473019593531975	-0.253073859477736	-0.450806793572962	0.218965035686264	-0.351482949614366	-0.0769008195587646	-0.613245606193014	0.0529031834380798	-0.20061900844742	0.144491254533621	0.0895315726335027	-0.401790738236537	-0.0266533101712614	-0.0632492603864933	0.268530130288012	0.516413797570611	0.367204234092195	0.421471719833827	0.290489422454517	0.378338089621432	0.229418279033395	-0.081557571809758	-0.463119571499901	0.266907153734109	-0.0818832523153797	-0.0833990814899291	-0.089619901180323	0.101230457941322	0.292747705719697	0.0903131494557348	-0.180090251507376	-0.366638381921111	0.294546464832886	0.014681582966426	0.597879428620214	-0.149338901688369	0.286576418195011	-0.0804623223831244	-0.131849009642764	0.0154068544066015	0.0150085059836577	-0.615199875083078	0.329638536606461	0.110816832426931	0.375414350188852
ADCY4	-0.755589263279623	0.506985177068675	0.347877235834928	-0.750716021876703	-1.39613037920925	-0.326551357165029	-0.594550346803707	0.825712139842661	-0.472889016906333	0.197419940423516	0.0487243817795445	-0.656813850016363	0.717445650452885	-0.0526413716145362	0.568215611042194	0.598091695670868	-0.58106830995453	0.796257602451173	-0.265983566294665	-0.615999830721566	-0.40478307476252	-0.566740701688624	-0.378946851798504	0.0366871673527953	-0.263065273342727	-0.325343539302168	-1.44851967962139	-0.20719022053618	0.334750197798522	-0.113524948746265	-0.503738808962164	0.0737092912340983	-0.829579148840491	0.0895190657040717	-0.633825494014643	-0.199123200302939	-0.156906918924171	-0.295502564922453	-0.265541844563692	-0.14284203247223	-0.429668298432607	-0.499956794726525	0.569342759769926	-0.3380220845166	0.281660737476055	0.0404807605599392	-0.24095031320647	-0.0538586954207121	-0.565041374953653
ADCY5	-1.036680984486	-1.08220133955072	-0.939141577590831	-0.689814581886752	-0.512150680047787	-0.548103417868366	-0.976250192953779	-1.39783507184116	-0.865940124826229	-0.715621178934901	-0.771868998113292	-0.846090089120573	-1.02196133063703	-0.70606368931742	-0.820768140826751	-1.24978586309109	-1.13027527872277	-0.963306992496344	-0.946391610094261	-0.529081514128138	-0.545438035363218	-0.460879254242611	-0.533715576922841	-0.555804247908458	-1.05676947712414	-1.03754504893348	-0.54991079778223	-0.440712466575454	-0.712871898265641	-0.302464877844163	-1.15039792975899	-0.421442888161866	-0.649479252790221	-0.823041561173741	-0.986433685031465	-0.763436643904553	-0.87226593486895	-0.472032132015225	-0.913403713313151	-1.27355571588035	-1.04848042973839	-0.430718944847006	-0.177636452775154	-0.248398806073852	-1.05010281563221	-1.084848122806	-0.733557606226625	-0.761631604661473	-1.07420239339292
ADCY6	-0.217749225520169	-0.302333469228	-0.281213566915361	-0.255358314562417	-0.447990762172396	-0.282721206418993	-0.430486107832681	-0.666818992459371	-0.47752343226613	-0.672005176354749	-0.778716630451335	-0.545964121190561	-0.454263995610856	-0.532328487642385	-0.162246328775585	-0.351029189177402	-0.384393018070748	-0.390459070037554	0.00527392369604228	-0.114753062628542	0.0179419238742076	-0.0129747524065603	-0.178367702685606	-0.070451235950976	-0.482989452931377	-0.423953922773288	-0.466009873538975	0.0557471039963578	-0.359173256536602	-0.625000393192507	-0.444421535186574	-0.275598412957593	0.486943437758734	-0.250834960869718	-0.627357354414282	-0.512232459306744	-1.01536242628787	-0.182627381284208	-0.450884557510179	-0.293528857041649	-0.51346164976966	-0.480810201031465	-0.316799688229375	-0.439931079115058	-0.498516568202539	-0.326607558199443	-0.433299002020469	-0.509120276869768	-0.0806299147115995
ADCY7	-0.994988237830749	-0.19599061493497	-0.34254115180933	-0.841263202586546	-1.32810297791396	-0.353512466463686	-0.446428605976197	-0.717802974007989	-0.540588401940756	-0.652702424841833	0.120199990623353	-0.947651445168594	-1.30056998242134	-0.295123550751399	-0.97265741347756	-0.580274001916671	-0.313159477775759	-1.0435440502124	0.192315127997936	-0.760460192477451	-0.488790840119284	-0.653085646076919	-0.718658537521234	-0.368997057760202	-1.28037207945017	-0.957496403218115	-1.39943990853475	-0.588492343354471	-0.727148741043507	-0.144935886995542	-0.406604933015994	-0.955479032047155	-1.22999547230504	-1.04959061810387	-0.738259895457716	0.654866785518137	-1.13628924355315	-0.650956998109361	-0.53028934008136	-0.962291870468468	-0.979715893329301	-0.594686974072929	-1.15106223663831	-0.90975067249542	-1.01771435905069	-1.39162967635108	-0.706745195039373	-0.742791707727971	-0.964522980003606
ADCY8	1.01466396623736	1.24576124657016	1.59301024341152	1.19987805950335	1.71288030109993	0.130632661966864	0.995835797027102	0.593872923089537	1.15031980139985	0.909639277097775	0.471456685856774	0.409902167046181	0.361753039135383	-0.416897261138185	1.08582019673006	0.987500045287557	1.02823284673099	0.894563383632459	0.897743467658218	0.613894339632915	0.399836154604007	0.852768325619356	0.319597760596128	0.224695475972817	0.992322193419085	0.568831986878621	1.67642606198362	0.188911913636375	0.0186280922450282	-0.769046817259381	0.833115664691239	0.845885579344103	0.957380547551819	0.61550011274726	-0.0396436065450412	0.0872626586162074	0.555248176040561	0.532212329630974	-0.785830245007891	1.08198711973822	0.124576068430854	-0.426742258864724	0.552404236788206	-0.392068683733305	0.673603327455581	0.450290238982152	1.41770514703585	0.259795715786599	1.02538384913645
ADCY9	0.323944985021428	-0.214753372803798	-0.422525351754539	0.0842397672950577	-0.583195353254853	-0.656619381652544	-0.0102991479842696	-0.142267152783943	-0.341276265114745	-0.234657657908429	0.0750103357782025	-0.129549120156026	-0.19688670920397	-0.47072267141262	0.067203769215362	-0.233081786367308	-0.0233578035531703	-0.170941936208105	0.248619023138501	0.168770272087517	0.232094702220681	0.300939556248738	0.301566800144386	0.190814052338208	0.229134746757007	-0.268302278290951	-0.542382509136464	0.295604052505587	-0.339971437789772	-0.0146254098267086	-0.216686513891477	0.0336432924649542	-0.0853765205831201	-0.209563766041509	-0.326886950403868	-0.383055285128766	-0.412730669549822	-0.00400819325956025	-0.323148162812542	0.0854498603530074	-0.0775511727900274	-0.55347510505769	0.023145449125202	0.0722762203899434	-0.389437250558019	0.292201776021856	-0.442989412455025	-0.370813208297229	0.282192226118483
ADCYAP1	-2.81948901685724	-1.82932020156308	-1.88137695218622	-2.7906755919027	1.10086160542588	-1.67092609556202	-2.4406075368409	-1.89846748448245	-2.08691108911308	-2.27289140601894	-2.2459254129373	-1.48710122022033	-1.90113491358399	-1.69380792188797	-0.870654503512683	-2.56497829926109	-2.53695664833393	-2.11976677931695	-3.00999064272878	-1.241971524223	-1.46859426889459	-0.193821397600911	-0.704687549155305	-1.94056552994501	-2.76135074576766	-1.43904058881379	0.470715030096428	-1.50348150678087	-2.18887735451051	-2.28695719943156	-2.37914307521843	2.23439680090286	1.42118896879035	1.20397152594073	-2.68032280046525	-0.324178038874523	0.558250708315171	-0.0766190361934958	-2.76135074576766	-2.51763319392175	-2.68032280046525	-2.17181405578846	-2.3620841350385	-1.80667541269141	-0.342490746539613	-2.31786273503251	1.22939474048775	-0.674875288047726	-2.52921132801807
ADCYAP1R1	-0.378372985964341	0.479567776431565	1.66011694130154	0.323813414276508	1.12176529410545	0.690903192004044	0.152396184231986	0.263098559863016	0.730105170576088	-0.516772754850621	-0.861726548019468	-0.0399723130071893	1.57514561432503	-1.48002448567769	1.14448198159273	0.893764476182688	0.341692990762411	1.14774968872776	-0.188916606126976	0.0501452010169804	0.20360483914185	-0.0582472403014753	0.0510933212111856	-0.280751665927959	-0.586351157076307	0.255583412009088	1.12234164730695	-0.312025660098018	-0.170477646747727	-1.30482023049295	0.300209002810593	-0.464430823100399	1.33644743850488	-0.635788245972346	0.364959707732387	-1.48719693182905	0.198317982654684	-0.151262808790247	-0.267444537361558	0.751683453647256	0.256434906079972	-1.03943552825628	0.0692077863657803	-0.01724808657228	-0.085289337645944	-0.0488891140528595	-0.831178449310785	-0.858911471363341	0.0962951610870953
ADD1	0.0732634428547406	0.0133424731832799	-0.0212579101570694	0.382928045799175	0.0303989615452461	-0.114337829500013	0.0635660150094115	0.171119044180603	-0.141841906047495	0.235233480483003	-0.0876904614713472	0.177820170273665	0.329687921211187	-0.123888597266958	-0.119559039123868	0.209083912715422	0.0988536890481296	0.525982050735373	-0.256383912980861	0.120025814707645	0.0913176857672636	0.137625918104638	0.164456772971443	0.0258869245593813	-0.0239207263765416	0.00201247284632627	0.142340536317204	0.123936064246156	0.56256892178968	0.0975097945997714	0.145662103832779	-0.603916317390027	-0.217493502605376	0.1029238332729	0.270633102061883	-0.520653427159401	-0.0200470572166259	0.0285032370208373	0.409886394104348	0.0825938271818506	0.0633798111997736	0.161341678152921	0.127034694339437	0.128522780299607	-0.085864050979358	-0.204557810191672	-0.00662426422177869	-0.272667639156462	0.531390322189819
ADD2	-0.201231528433354	-1.00267039755474	-1.3052224647596	-0.531340324085192	-0.242310301069231	-1.26674742224357	-0.662301678569841	-0.57229602712608	-0.95760690401943	-0.4933598650063	-0.719105765711242	-0.0969800658277229	-0.753472602485025	-1.25354039691503	-0.121111739931987	-0.468480975952207	-0.889394699265835	-1.15459374258455	-0.349025027630118	-0.200804697452012	-0.405955393023946	-0.275539325645502	0.143222377951776	-0.352784542972362	0.489062634830482	-0.748907559070089	-0.321042933149647	-0.146465256659921	-1.3149160676491	-1.06344105233331	-0.844851210061417	-0.147475194276442	0.883549270874417	0.15437479301461	-0.634797617169325	-0.607491140219388	-0.815440383696459	-0.568988190399203	-0.452372452387709	-0.255239847143011	0.0454612066623008	-0.7823996619856	-0.710116944618918	-0.433229341774272	-0.218888637547019	-0.703448836081874	-0.380017050812472	-0.307403694709321	-0.229657856102809
ADD3	0.713849586280995	0.681354298639873	1.08338038234366	0.886838221841584	1.03985029203744	0.617346146248496	0.469465996023112	0.601343493189197	0.781679835563543	0.614560208372615	0.154699732443023	0.0942441173165614	0.81560738475128	0.0237774038729065	0.366476470018774	1.07723030944911	0.609906347933814	0.762217665741293	0.341207108853717	-0.167145413509325	0.248629774234065	-0.365528078404749	-0.395823115908013	-0.0773359911519695	-0.27226617999711	0.472088895821262	1.22274382573704	-0.385706679303474	0.591921653265864	0.103845995475123	0.665583397542663	-1.82163128361987	0.0887265211556369	0.0663161608803139	0.830306562366254	-0.0230607641752116	0.184412651187195	-0.137300411636684	0.432768994898292	0.99672281390775	0.209815478919881	0.138720280609098	0.391590248153869	-0.202524881938898	0.552404236788206	0.788755723463726	-0.171098170296677	-0.0469881025782713	0.951900827456145
ADD3-AS1	0.567655566932736	0.561141486276159	1.48320729223183	0.87470010374917	1.66770745852803	0.879006173717672	0.389993189114577	0.291024750330326	0.997456239646631	0.439375533504293	0.16145097334762	1.39181250962921	1.5186122874021	-0.0650524507471888	0.803679490062184	0.83018275888418	0.539262956050025	0.269521766601943	0.326516103383585	0.306353254698952	0.550317896202853	-0.0180612227565374	-0.106605515224278	0.204403354923636	0.0252025587615685	0.493020932881429	1.64155905321386	-0.115829497769987	0.191315485085662	0.069577420623709	0.652426532143322	-0.0824909277648768	0.845432337340764	0.849550462888446	0.978357616651053	-0.0408934608253573	0.106430768530234	0.0881183527943305	0.512916721279815	0.929241326733203	0.299781754642561	0.184087384186479	0.567814598767639	0.38810013968448	0.484553957993279	0.583262877162124	0.121516278897165	0.647593723489037	1.09629192843819
ADGB	0.321206348372144	0.187765588550612	0.0113355614173328	0.181361082703931	0.500187478167356	1.39378335445888	0.112600776476811	0.207242802529894	0.102336852537578	0.263258437924485	0.193748727328091	0.138428730277872	0.0540751045873854	1.04689791790192	0.435704785174457	0.259499037338081	0.13328657353437	0.0635660150094115	0.282846666971167	-0.580661601984045	-0.452468782826414	-0.567467690310032	-0.397917891720628	-0.500320362795971	0.171946292794286	0.1566066693955	0.336611402882914	-0.544498815236498	-0.0893287997989531	0.116600580375211	0.126655624542308	0.107184277269552	0.233777179404674	0.370342197262014	0.0194282774913082	-0.00871257983406786	-0.0463652545949309	-0.634236860908116	0.115024622121571	0.499270977091076	0.0156478641009752	-0.152586047457897	0.151360882901177	-0.37930122254691	0.241596098158318	0.159092180232152	-0.323060577702757	0.117362268814836	0.200830765868894
ADGRA1	-0.192563360327143	-1.5723043584565	-0.975370101784893	-0.453032617870558	0.745658504417796	-1.82211452937917	-0.929569330777337	-1.62354938490034	-1.46339789803029	-0.366039719576884	-0.471662929759523	-0.222433183180723	-0.25805081249488	-1.08306813786193	0.714955946615977	-0.621610736652243	-1.13383359779422	-0.670601472054655	0.234125883895141	-0.0410535777886595	-0.0367930926534681	-0.030676813524268	-0.204766918777399	-0.341106077325448	1.19454631168889	-0.985222644492952	0.603767983173858	0.672131680709265	-0.683007342616519	-0.79043909035166	-1.21658193956318	1.05213008652616	0.535840955234886	1.24313832689909	-0.941490754806442	-0.194275899642228	-0.432505025313994	0.0549655804091271	-1.0316577570879	-0.798466548400876	-1.10705891210517	-1.55666545631334	-1.04817135710048	-0.56932769727983	0.00792492864655978	-0.0765410553821318	1.33644743850488	0.100332630512719	-0.356044447933938
ADGRA2	-0.124543736680424	0.220509024588126	0.410090489881974	0.23869696627472	-0.0625249551981465	-0.507852720687662	-0.046455329993143	0.0115265363376744	-0.186355838090742	-0.398220909711489	0.75693550530293	-0.15692402649306	0.28444180489177	-0.474977856990954	-0.227959142393996	0.140693700330972	0.304811870924374	-0.0103539730880199	-0.0799988148731179	-0.0761710941843878	0.668130466250864	0.138621910340211	0.0431425272613719	0.798445074581378	0.436888242058489	-0.0578576404581067	-0.0676258524688868	0.162845718475352	0.292636384230276	0.13980028858172	0.0112005626712016	-0.757799770384294	-0.352610749001878	0.229239853995573	0.0422656112823634	-1.20487810820743	-0.958905135256153	0.44704064420531	-0.13549784446798	0.0638315830725791	-0.380599288991931	-0.372600209962088	-0.183543474754681	-0.597917332420478	-0.0880334085605814	0.730754586030542	-0.021338366175612	-0.477668402517799	0.140780956817511
ADGRA3	0.522615924834027	1.06084770762295	1.51285949945114	1.18503774465397	1.11393171326995	0.885437276593022	0.569526075157208	0.365569617291152	0.94116092826239	0.169313200685421	0.426320959256456	0.28385239970951	0.606220384756862	0.359249801122681	0.301304194569368	1.06988570147948	0.451137518938388	0.365254086466042	0.512875470851399	0.427078480539644	0.680830310375562	0.355256227819041	-0.012115567025787	0.317682241623852	-0.36973241150306	0.378512107914423	1.20504287632807	-0.197056762008423	0.34162589592562	-0.284075436897886	0.80708855157747	-0.562225952623118	0.114444456789276	0.423406503679631	0.363292992477991	-0.0334630398427671	0.197550277336867	0.235343404122169	0.00101773069717084	0.998456031550646	-0.163473039838686	-0.251899761314973	0.32839089695428	-0.141800498145781	0.339028499412217	0.990500766764484	-0.630555136622274	-0.380248155213558	0.744989980895716
ADGRB1	-0.206075237250049	-0.595574430031874	-0.654623638142384	-0.146161912626065	-0.392019740580715	-0.578441501250475	-0.497139182923961	-0.308850921957266	-0.731887647144972	-0.434200611947508	-0.104574647893875	-0.423284677512619	0.131426416826199	-0.927812458413187	-0.385615395663519	-0.279816582767729	-0.920708155966361	-0.242081494867087	-0.238741419884568	-0.271645917693114	-0.17680753562429	-0.188451019610215	-0.180588251966153	-0.0319373317783833	0.34367403415355	-0.304400640571231	-0.436668047456776	-0.133821789608446	-0.402384625406227	-0.557417526882865	-0.73320156785565	0.327116162887557	-0.139835451736658	0.56832352892958	-0.627999668767484	-0.92020982306512	-0.53998364665916	-0.180860965021644	-0.468865910840838	-0.453911199980808	-0.780048168675582	-0.840503855759905	-0.136661376411243	-0.282810590984849	-0.484782727256742	-0.375041291998665	-0.385050967210901	-0.451883000085093	-0.502969798146105
ADGRB2	0.468921324497558	-1.08362582908534	-1.01916325369016	-0.434397093680252	-0.326472790225226	-1.51940214992578	-0.0434312776116129	-0.831474306550003	-1.52768499905717	-1.04431624180605	-0.588550923576619	-0.464343475017535	-0.417649923044137	-1.56076656238259	0.975224144024202	-0.104713916272997	-0.385213385585223	-0.686499798179041	0.787277173562836	0.298237040007935	0.339958023770551	0.14734177898764	0.302995915016165	0.229019699527897	1.05817286695963	-0.820755727701677	-0.424582604882313	0.32534130109028	-0.583941743187717	-1.22724333761394	-0.463119571499901	1.00841535676729	0.0164510699459341	1.13370333069547	-0.789936994297902	-0.708053714013198	-1.68940451094162	-0.0954898367833922	-0.607992166776931	0.0190784742494315	-0.356044447933938	-1.46471755418373	-0.803735248797648	-0.698396150771316	-0.0980550271303831	-0.177636452775154	-1.63771753955969	-0.351091841259911	-0.0462141675128394
ADGRB3	-0.00305804181255907	-1.24784735182567	-0.635521640398486	-0.635943846240842	0.579778397012274	-0.794971196433682	-0.67639014689278	-0.884825623757374	-0.286903309213194	-0.00968322686338616	-0.398945103106819	0.562911173809338	-0.292071289787469	-1.13262304871273	-0.581151750258848	-0.118718909766222	-1.1198508025964	-0.60776233861165	-0.588017627275112	-0.481343730941319	-0.814485085761063	-0.582487516112577	-1.084848122806	-0.884825555640462	0.383768077649757	-0.451180930175621	0.462196348202453	-0.326382866814072	-0.384513577466685	-0.856565971476447	-1.47282131611411	-1.26100369317187	0.0770638714843576	0.741199245695017	-0.0814164512878712	-1.36473220955507	-1.11550781595858	-0.313536655266396	-0.490185766357562	-1.19662539573526	-0.344996183160074	-0.974476201220813	-0.623554055989161	-0.60510381139548	-0.66743331210069	-0.902255146009702	-1.45855834881207	-1.13473306773895	0.172299773820477
ADGRD1	-0.364203040334141	0.362226513495758	1.19879845350404	0.174601347953068	-0.737171697203375	-0.138530346194595	0.98267746503237	1.45252897916719	-0.0463545042301012	0.0595616663926178	1.47431235332125	0.0258042024531119	0.971325735331395	0.117078709464537	-0.944944795198811	-0.0219194837278787	0.0190555166436073	-0.448401603376594	0.00231862661433531	1.8468710409557	1.04364066859224	1.84249688436627	1.07005609474689	0.750022222789474	-1.16088874095843	1.18298730096496	-0.448197070197481	0.914390815434209	0.382649756345708	0.47543012880226	0.17631176291701	0.620800003345306	0.135269840012703	-0.89082256433547	0.206175224871009	0.289477373746231	0.628134114470721	0.651107347397619	-0.726689711918742	-0.187238403460087	0.934384136600881	0.124020311070342	0.484035181527134	0.294661356327299	-0.354960280519863	0.25180907229391	1.96676328561028	-0.804381826409481	-0.687239438609185
ADGRD2	-0.173704894188843	-0.156336483883572	-0.406235833821496	-0.38123168856956	-0.175771939261356	-0.407883270596674	0.0397246934613231	0.551395293255079	-0.189368807605901	-0.0138651681943303	-0.178293481793128	0.0263706144526261	0.677477791018311	-0.247546955057723	-0.24093409499489	0.423151649012255	-0.649478456285764	0.626010567581766	-0.097116042372372	-0.939669266443801	-0.830898251036311	-0.869821458169226	-0.969901114182324	-0.845259445669931	-0.162843909471309	-0.556826483712683	-0.311553102620047	-0.941654829336979	-0.178870320707389	-0.193449718252044	-0.389226252786196	0.214659556716217	-0.439675681100151	1.03267258681785	-0.186703663222778	-0.256177847233358	-0.302648903834257	-1.03372588449821	0.237770480575968	0.0241186052215393	-0.31790252168774	-0.496153514803196	0.318875434861229	-0.205433620274825	0.190598752645156	0.394958928971842	-0.53143823825121	-0.245262190700313	-0.325189710691189
ADGRE1	-1.56198910108595	0.494362462258385	-1.38798782383284	-1.55254666832643	-1.57304856911598	-1.31184099095775	-1.51618138209423	-0.907657167953734	-1.34269597909376	-1.07477053789125	-1.35972914111514	-1.65080059787308	-1.41428776902851	-1.27857063400991	-1.64024597357886	-1.49114808217821	-0.387570038888177	-1.41527947667386	-1.53817928251375	-0.913403713313151	-1.14180740293286	-0.280680281737761	-1.38763748116951	-0.906224361168273	-1.64577270907724	-1.66243047397379	-1.6449287997356	-0.428560099889126	-1.48775729030249	-1.40250505639032	-1.53819120971076	-1.51577926343706	-1.66572525109074	-1.65585279947721	-1.60528453869582	-1.66243047397379	-1.56588820059862	-1.10534086481924	-1.61843925003983	-1.62414405514313	-1.59868026678596	-1.42928591631418	-0.445329468866903	0.474577645398208	-1.66063433004777	-1.5293238572455	-1.55370210096604	-1.64434478006915	-1.63032207084488
ADGRE2	0.343181817576441	0.880302290923589	-0.290153493943923	-0.183995855197073	-0.293041880730929	0.769198001276926	-0.268329940897476	0.800443472817591	-0.27987321885332	2.17408270537852	0.903523059417416	-0.270414300460925	0.00527392369604228	0.253896223648447	-0.252173035417922	-0.0832889673579248	0.968587019881286	-0.113518642226126	0.886051318184457	1.03331686849587	-0.182209418075454	0.297390267608007	0.571835705731601	1.13715249705364	-0.525271961263351	0.383290857730578	-0.359892371089712	0.783773041484414	-0.28526108064937	-0.174618063808381	0.309756745702701	0.368778975690664	-0.389628311577472	-0.276578960400511	-0.334890173573878	0.519221292678504	0.249363668309976	-0.0281592910874544	0.367536641949149	0.0213470152551744	0.425106194367073	0.0833869265913303	0.603199711545343	1.26377523581376	0.0318862757569003	-0.315949786419719	-0.498919800634022	-0.428716321705784	-0.261620251261024
ADGRE3	-1.26674742224357	-1.07328219571254	-1.14908624452913	-1.25665726492411	-1.26349353137998	-0.960290915817011	-1.17220966848512	-0.951190638860753	-1.10699607142665	-1.06684322735187	-1.09639502257576	-1.26665566976937	-1.13852255990896	-1.03760524219842	-1.30512950296531	-1.15831998524224	-1.20080911677223	-1.09869343800644	-1.27406207709584	-1.50682621779888	-1.49923201426028	-1.50864412615905	-1.49923201426028	-1.48359262364055	-1.37766441382971	-1.38249837979083	-1.37406466318004	-1.4942392104348	-1.2650338971082	-1.14229167137463	-1.29422176400248	-1.241971524223	-1.40219218795861	-1.34897525066662	-1.33832503472143	-1.39203340206335	-1.29346921613379	-1.49760660073592	-1.37104444189166	-1.35452496373446	-1.35452496373446	-1.15106223663831	-1.13882174123851	-1.39957118126345	-1.37880479217672	-1.29824878481727	-1.31973453844416	-1.35782770940223	-1.37078715557687
ADGRE5	0.184936664932759	0.397529603265084	0.401716468054546	-0.086532211491522	0.299712916233154	1.03897807292494	0.0983672979168414	0.149138780672419	0.819177879456979	0.158853738470641	-0.364121651065776	0.591249953533827	0.410480823811468	0.409163725531818	0.149816002439292	0.54583987561579	0.112921333247648	1.22874349653564	0.0758251945338154	-0.291381267613128	-0.445924104080655	-0.83512445818063	0.127281127111194	0.241704635922398	0.134826024357181	0.701958840120959	0.332593036657349	-0.180248165123715	1.00315818971626	0.131802205561373	0.123031763371673	-0.355294153409726	-0.454001342151309	0.446903223157803	0.899386421420892	1.00414737200769	0.48561871206672	0.316396077062253	1.26653026375409	0.658721116488207	0.147076159825877	0.983103239984122	0.295750057298635	0.439264334234168	0.866576266696612	0.624966453404297	0.331121921224996	1.27158623526608	-0.915213596087423
ADGRF1	-0.88513575920928	-0.661442499885381	-0.824243479560663	-0.918250063701883	-0.868988395401985	-0.752043888924544	-0.822380540389939	-0.394658756716456	-0.780694226846313	-0.53032191961025	-0.688705025077045	-0.957013405537872	-0.509063774362098	-0.721163982401848	-0.978469567982521	-0.819972049076355	-0.884825623757374	-0.799121980762048	-0.948520617894158	-1.30375528980731	-1.29139966866393	-1.28134794082608	-1.27296721278567	-1.27081266241283	-0.842322594447807	-1.01839863595712	-0.964328316820219	-1.26790499088076	-0.856230951697667	-0.706062630114608	-0.91108606155938	-0.745916776042949	-0.955767195789422	-0.950175069482161	-0.970668418029883	-1.00073879846259	-0.930984287338781	-1.28928628382713	-0.982766027464068	-0.928537348257104	-0.997464148286658	-0.826225018281996	-0.398914982428235	-0.843935210097467	-1.02444523143297	-0.662667688505762	-0.9655341581996	-0.987090426024199	-1.02968969734212
ADGRF2	-1.59172961430394	-1.3454121796333	-1.40625911527192	-1.59328092520038	-1.64111518585643	-1.33892806314552	-1.48088337216983	-1.27422411017221	-1.38722280487941	-1.44689649928595	-1.40904038627042	-1.74406945988351	-1.42163912295277	-1.31983039037108	-1.70469209977325	-1.54503390262654	-1.52880566712875	-1.44404354773999	-1.61449279870437	-1.7177616999016	-1.7177616999016	-1.72243442097831	-1.71324147874157	-1.72089965178075	-1.68798724277844	-1.70330814366607	-1.691118717163	-1.72669079121908	-1.54249811639185	-1.43757301388289	-1.59915530816084	-1.56588820059862	-1.71474462547089	-1.69033622992195	-1.64452958815979	-1.69982347931594	-1.58378941718833	-1.73779221467702	-1.67091198621826	-1.629207343017	-1.66395713289585	-1.46216547486093	-1.34853240361611	-1.73113013771023	-1.71256157833271	-1.55890433420577	-1.56416589292244	-1.67643229669235	-1.66417138195494
ADGRF3	-0.618157105954442	-0.51961649799087	-0.230555198477477	-0.714881744246573	-0.65303334398935	-0.450997017740903	-0.605071861122215	-0.42314231907363	-0.55545286734002	-0.46472038059907	-0.385516801695883	-0.793965639935604	-0.520258876925862	-0.510187061404174	-0.609100227603217	-0.45314006946786	-0.63441713366321	-0.627158994760258	-0.725973352488017	-0.731577288879949	-0.672098015600465	-0.717876363116364	-0.719081117449649	-0.655645366398235	-0.384764706870685	-0.7622491612284	-0.738743583766716	-0.71799649598595	-0.621945624974927	-0.339516595669717	-0.700255034236233	-0.611464769255148	-0.725157155016978	-0.746736123390133	-0.679145373521601	-0.735149454796981	-0.674623388663457	-0.713366052250066	-0.735428339750034	-0.551828092798065	-0.751028898208568	-0.476634222897562	-0.362187482695575	-0.731069975016277	-0.795115594967459	-0.404608720431079	-0.709831126393181	-0.754942645584309	-0.79043909035166
ADGRF4	-1.02931629774889	-0.855420121253026	-0.953362338175653	-1.0545268800545	-0.969092057402123	-0.864026860551487	-1.00353678517515	-0.733819459671503	-0.937772065974678	-0.877648034777964	-0.875670818117615	-1.15528595656986	-0.871582270910745	-0.738129111305658	-1.11637824013791	-1.02775263231769	-1.06734966773597	-0.95563426105607	-1.10829217871135	-1.35825959967629	-1.37095272795138	-1.34089367006054	-1.34512019730923	-1.34992801145402	-0.887391911826529	-1.18292786148597	-1.07714538005145	-1.33983900461685	-0.974619360601359	-0.683117437677945	-1.09301869251811	-1.01386530091392	-1.12087802749843	-1.14010788691466	-1.14939985083488	-1.19861903270306	-1.12173241223746	-1.3603859861725	-1.16444176948729	-1.14475631840012	-1.1547798685432	-0.633447411433396	-0.675811818843945	-1.20439902749922	-1.16888967387215	-1.01700118659928	-1.22871438929671	-1.16928506579443	-1.14290205350248
ADGRF5	-0.437113548192538	0.54732964164878	0.838328328021863	0.0881891877743851	-1.11928625509084	-0.675961543731861	-0.412337316133806	0.815086788953169	-0.0248714064209344	-0.0747869495248831	0.709234922677163	-0.476228491592354	1.07277510076926	-0.0319852263059352	-0.795991745876959	-0.00599827808498757	0.252227661644115	0.654453756391155	-1.42539156552075	-0.556098283269916	-0.388640897253822	-0.382711018870154	-0.477668402517799	0.0666393680151349	-0.295855692071867	0.0197263458016827	-1.09283109393459	-0.237568616226716	0.41488781970856	0.22699428822436	0.136293015995529	-0.823529794892697	-0.788768714028557	-0.37820073014014	-0.279127077589303	-0.796367869025892	-0.0101213099046612	-0.0568658528143005	0.0598809906983327	-0.772139728325774	0.0295810302124774	-0.103411023187952	0.510609879605965	-0.171460686941428	-0.727148741043507	0.721858958110027	0.263955231818016	-0.886950958286911	-0.53696311176275
ADGRG1	-0.224500281001685	0.341375739947219	0.416769972023235	0.00668783845371643	-0.719798760050234	-0.0963680800473414	-0.00563145005508892	0.175840152471265	-0.0808433301891375	0.294730293676464	-0.361775001565401	0.0572924814069286	1.41821498634725	-0.674777486125478	0.505509613243548	0.838328328021863	0.913427426571878	0.825066355691986	0.83428526268756	0.759655818825807	0.427617195614141	0.583993075942598	0.305193046113298	0.273186958834171	-0.781109146790292	0.325217385218352	-0.5705746707016	0.427617195614141	0.256188804838334	-0.792095757835549	0.609241922300453	0.845432337340764	0.0939149954160494	-0.258737881927842	0.0604764432647436	-1.21504237534896	0.192874522654705	0.216495768349676	-0.562946445070021	0.375690007133677	0.560022758822322	-1.19046761063528	0.0228112346191007	0.655649678546373	-0.0773359911519695	0.440208845737366	-1.21425661869855	-1.20422129101868	0.360605491280684
ADGRG2	1.5567947809332	-0.917555828880695	-1.15542127369917	0.212221489205585	0.995835797027102	-1.02011885916839	0.0536303142229702	-0.725647074293895	-1.02425739573987	-1.02246290328636	-0.616152901535755	-1.21213866736762	-1.14416712877115	-0.920893965331831	2.29399263291042	-0.111525714911249	1.75096864460882	-1.33909814263064	-0.560901944431811	-0.413494519500778	0.481965630758782	-0.204557810191672	1.61325684713659	0.183800024405746	-1.24318708051353	-1.24482567313681	0.776394593443975	1.26087483796984	-1.0693918398717	-1.03423064546311	-0.942247048935283	1.28816883410617	-1.14930702742089	-1.38564430878048	0.749170671216532	-1.31626298791677	-1.20175970027722	0.286087101084352	-1.49573669286064	2.22345924391928	2.035808580628	-0.935565264963873	-1.0617443507061	-1.3261703280953	-1.40250505639032	-1.01077469224558	-1.1020209774731	-1.28511605610847	1.6262081299927
ADGRG3	-1.26362071118689	-0.870797665207189	-1.00029768646224	-1.28364229560882	-1.29074050022267	-1.12218628367692	-1.18273336541785	-0.584548778126586	-1.08735314829882	-1.1494432698095	-1.11783275024235	-1.32143607135253	-0.917933951449864	-1.07341667037361	-1.31109365250666	-1.19685436598153	-1.19253843261736	-1.18167243292854	-1.27119598746316	-1.35360751335072	-1.36934504997413	-1.39096606924179	-1.2992483634791	-0.468955819266279	-1.39943990853475	-1.41275560584741	-1.40053306768331	-1.2793993537247	-1.25015098771815	-1.16570279402661	-1.29328695893864	-1.29959015485987	-1.41904514438965	-1.43191495625269	-1.34488961315082	-1.39678842502828	-1.30323447058147	-1.21780883302648	-1.232321653725	-1.37894902677873	-1.36265241833007	-1.14046016762454	-1.10624281678026	-1.3434720591237	-1.42890203533231	-1.19878330938401	-1.29972728163503	-1.38165579448303	-1.38355360382994
ADGRG4	-1.27571063882136	-1.05330239469009	-1.09784131742218	-1.24525461922054	-1.24718054947516	-1.08665825770808	-1.01461746936175	-0.98502652244692	-1.04288254009817	-1.11173100835263	-1.07540464012829	-1.30778161485763	-1.1383494705233	-0.715676622389309	-1.29319080087807	-1.18692387067666	-1.17468339353313	-1.14451954929998	-1.23825277817436	-2.05724686973707	-2.02107681096305	-1.98627630194663	-1.9806991602045	-2.01677267196801	-1.37315321574861	-1.36451002528396	-1.35825959967629	-2.04506293472636	-1.18946396023399	-1.11958369116883	-1.24121686122455	-1.25286089234179	-1.38509737127972	-1.38355360382994	-1.30783569978897	-1.36287668655957	-1.24251096396906	-2.04273203325385	-1.32083732880601	-1.32658351246404	-1.34834079128029	-1.08759707268508	-0.824492774283363	-1.0823923325909	-1.37498163274036	-1.25448211735824	-1.19084124068071	-1.17161952063834	-1.35360751335072
ADGRG5	-0.8725764054522	-0.203972840098278	-0.710417252243071	-0.843579423850245	-0.8062810522406	-0.669001362735068	-0.756993407665898	-0.198561708006916	-0.766381115166006	-0.297229444699184	-0.606712121200308	-0.88565963827008	-0.731712812399402	-0.614937099111364	-0.870797665207189	-0.621977270611559	-0.701170980974164	-0.749251318201185	-0.823424692350798	-0.93006875975364	-0.83256768214527	-0.907348905309973	-0.878457579782329	-0.338336154938146	-0.98478349006221	-0.979883876739106	-0.980047561230346	-0.69232894910685	-0.844213598015443	-0.689723276821308	-0.897954134135822	-0.825291314902188	-0.99961117214889	-0.97674179164374	-0.931870486035083	-0.793784595218551	-0.794999409507187	-0.984276232539723	-0.941300727870515	-0.956399465847611	-0.709831126393181	-0.672098015600465	-0.560010579390133	-0.937473192552391	-0.949442128301977	-0.747391412126753	-0.813388855461219	-0.727987174079395	-1.047409860031
ADGRG6	-0.430486107832681	0.0824894240728248	-0.33584588125673	-0.668150095418607	-0.728115101461998	-0.326347805680006	-0.609308366273157	-0.230493011921807	-0.606267606459651	-0.407164461551998	0.148263877829042	-0.818246886924277	-0.462609065330568	-0.10526679825553	-0.752732943104108	-0.195708324980562	-0.570458920907087	-0.443978552043974	-0.62545026307687	-0.762918176972402	-0.621259730846276	-0.615790461250131	-0.816950226368728	-0.687392974052344	-0.994529621628357	-0.599032899541459	-0.754539353123229	-0.61293640791527	-0.247105557950811	0.172389251641659	-0.331376909265059	-0.539401696389034	-0.723358486619994	-0.74032918805446	-0.539181960557395	-0.686793868383818	-0.534985753760926	-0.336109532674359	-0.602978369479912	-0.51655496134087	-0.727703365268804	-0.189606401710354	-0.166539356763459	-0.870496842208501	-0.328395641416672	-0.0104574348523892	0.231766993107797	-0.648299669612326	-0.563619859219879
ADGRG7	-1.35090442059399	-1.10749038460737	-1.24266852306849	-1.36090053622176	-1.37091866694507	-1.1792301912936	-1.28164430335388	-1.0786944346019	-1.21578314438221	-1.23084902371802	-1.2021513870227	-1.42380374053175	-1.20567593988237	-1.14425790641323	-1.41147395350619	-1.32556499061354	-1.33592277482925	-1.25648596885195	-1.36445105617254	-1.57932494765834	-1.59465426116876	-1.59263690862271	-1.60062712715509	-1.58835900553765	-1.48582850971021	-1.5057615152777	-1.47424884310946	-1.58481958631693	-1.385819067542	-1.25133337648329	2.0228041342289	-1.36561383810601	-1.50128515537172	-1.44920122454805	-1.44000346189373	-1.50211807647172	-1.3980528004137	-1.59932882209013	-1.46651870614061	-1.44887857364699	-1.45875560650009	-1.27606346837887	-1.08295539885795	-1.4514075508097	-1.48526073353573	-1.37912980173112	-1.4241307494106	-1.47203827967094	-1.47171993166767
ADGRL1	0.0386855419912358	-1.39571303636587	-1.14318454564655	-0.183642027000945	-0.6270731083166	-1.59640592085405	-0.244538407999113	-1.11840180056855	-1.58032222637872	-0.9934764134968	-0.56747607720033	-0.338808341584111	-0.673040630228031	-1.37902196743238	-0.339148956344621	-0.909859976325418	-0.497693945604629	-0.87518723953121	-0.238257681149613	0.12416341545576	0.188752043869788	0.157770873283316	0.0675882317570091	0.207871981859443	0.508404846804226	-0.978371654870299	-0.634572239124406	0.41321220997258	-1.00606532375298	-1.09987459322587	-0.94197187442362	0.296267098862754	-0.0488022662465811	0.587329732987973	-0.621041939473024	-1.01771435905069	-1.66498320317216	-0.0516148997972877	-0.580382139375518	-0.24947342010508	-0.673500143610454	-1.45513059063163	-0.0667219090670315	0.305530884098016	-0.417275986978482	-0.219259962058547	-0.589260100780116	-0.461335166371083	0.0916597088831701
ADGRL2	-0.600753181713059	-0.970960760526022	-0.924380326677058	-0.446891581017165	-0.949007412404998	-0.808596097646468	-1.28746360489489	-0.76123432441119	-0.910459211464886	-0.689814581886752	-0.351678934499264	-0.189982371382868	-0.879597894169589	-0.477155314513986	-0.684132500612402	-0.827387989686763	-0.897687013825617	-1.03194624467526	-0.595763506922787	-0.703730911275485	-0.721218339205166	-0.761848596484551	-0.898435187706307	-0.739859358912747	0.101632652775637	-0.844478387204605	-1.16270814749456	-0.6657472142057	-1.06421040496909	-0.770648949203481	-1.1717874512143	-0.580157348237492	0.350372085074958	0.252813561099155	-0.778854163557029	-0.597564976198035	-1.02829332370142	-0.793386534553962	-0.938430069010819	-1.31902042145261	-0.014514995631709	-1.10396676773064	-0.434844343143136	-0.365047340146348	-0.564373744278989	-1.54205798001587	-1.19488496791312	-0.446004282706397	-1.00281851012549
ADGRL3	-0.278361907713288	-0.746724481181827	-0.433578412421492	-0.214231691981067	-0.152873180673473	-0.818364281642818	-0.704066210040119	-0.863399821291729	-0.602396055389293	-0.915545143450152	-0.429829312584551	0.0900969323836368	-0.32030894212354	-1.08473332099845	-0.0994591309015294	-0.409865406425583	-0.677426631542424	-0.548552854269149	0.274459817828672	-0.0682340829917454	-0.141867451538593	-0.132877009128678	-0.632746739738315	-0.407913214490388	0.0641466104817847	0.131024452340803	-0.112668684219735	-0.183964984874508	-0.561496372489846	-0.94328846116484	-0.791827808039641	0.205053160145132	0.92173335243794	0.618525249061758	-0.668184076905166	-0.252605636037454	-0.429388079790605	-0.205433620274825	-0.0616077233373282	-0.832127259019229	-0.811431867467173	-0.991597020550536	-0.399169008515141	-0.573272620239771	-0.249172126911098	-0.782547066242916	-0.323148162812542	-1.00453656429535	-0.671358042731241
ADGRL4	0.54887189226447	0.847139917110598	0.473492823590817	0.657856977378414	-1.48520629429899	-0.151301106051776	0.212718186064223	1.18398404317147	-0.0908651756771532	0.176284985103989	1.77425957493067	-0.503641079698337	1.32882884245026	0.600731241085541	-0.50312374416829	-0.41817831611356	1.18879846283994	0.69170084844563	0.109447308508759	0.040343219347101	0.56832352892958	0.686703740662937	0.485791209761037	0.631556693322739	-0.208806805856967	0.81007215229346	-1.23966353445021	0.414649425891922	1.90700930139257	1.34792354303428	0.779065948317657	0.501892037100531	-0.957305707710153	-1.35227860926142	0.290724283523783	0.218910564320346	1.77544735804738	0.681118277739746	0.306881009458009	0.0385356149687296	0.931561254787506	0.351145042551422	2.32857355114689	1.38699543294387	-0.785375986855134	0.114045143883673	-0.471944276746585	-0.921559980890509	0.655649678546373
ADGRV1	-0.172330373373152	0.0030636652208123	0.0337292461466439	-0.212172360057691	1.16807594914108	-0.02725027170692	-0.317594430669735	-0.638182282180225	-0.21149609444178	-0.530824061208231	-0.456372210707714	-0.560792532539295	0.839639363576801	-0.708218169680554	-0.189575691337119	0.322926036762519	-0.067281914793424	0.723330188509149	-0.574069555635707	-0.868757426271269	-0.471944276746585	-0.664494186516798	-0.792363918927084	-0.632221347434942	-0.180509799129973	-0.524116703632089	1.17228118388648	-0.875624675473901	0.471382683685268	-1.36934504997413	-0.276514977690933	-0.747870021746257	0.0237072918793457	0.0240321589657461	-0.150441655285034	-1.06331144407772	-1.01371955731487	-0.507425957681296	-0.271243955108168	-0.424662488758498	-0.461428948674106	-1.18123254924227	-0.087172897012737	-0.410135497392468	-0.351524412146065	-0.0461025980308893	-2.01404266799626	-0.644743830302321	-0.267151970184425
ADH1A	0.394232703112303	0.170880978198912	-0.25805081249488	1.13936213372808	0.253571032038801	-0.0742501993616869	-0.208153940637609	0.147000009280908	-0.310793678677402	-0.068565792159143	0.211451308933591	-0.296132608212865	-0.0954200106076895	-0.155854176126735	-0.302373577459424	0.163871857298403	-0.228905463205626	-0.0363395200319703	-0.272265756086697	-1.14660566373468	-1.11579828974346	-1.14010788691466	-1.1744524034956	-1.11803641874803	-0.245488674796639	-0.269550858609808	0.1421598039485	-1.13713881151851	-0.251899761314973	-0.134209465730437	-0.478217408319608	-0.159920477705171	0.0177154946141618	-0.118568257703606	-0.201051714752279	-0.359685221307651	0.0610796515792191	-1.18926846835839	-0.231286597121815	-0.207528886605489	-0.237715284087276	-0.380248155213558	0.325910400468081	0.359850666274591	-0.375684917127565	0.0870137617912649	-0.344763891103173	-0.322093133708236	-0.264786449511536
ADH1B	-0.595690679087323	0.96258866928357	-0.1246810324335	0.613406120570998	-0.561991401572115	-0.0391723922650746	0.228167530690541	1.10632171066072	-0.460994965944466	0.709234922677163	0.537487202567522	-0.645917555184549	0.377987516292953	0.809423130976431	-0.576917831994701	-0.169882585944431	0.102528739698414	-0.309319459352684	-0.460665794127848	-0.673034881465541	-0.582592251905351	-0.506271644264319	-0.173019436056375	-0.540856146828719	-0.553358301647126	0.412262651788449	-0.653085646076919	-0.431992382103402	-0.205224277772131	-0.0732359887795714	0.506872773733059	-0.110992765074253	-0.312025660098018	-0.409622948131808	-0.220611116909769	-0.513046284579979	0.451123513143996	-0.248318422147593	-0.446394522905665	0.81261647102519	-0.134602944812604	-0.469388283513534	0.215993359430796	-0.65399799534761	-0.376817129580128	-0.445247133032378	-0.731069975016277	-0.596132806378828	-0.62050654732591
ADH1C	-0.0865940881736229	-0.133969716929761	-0.246160125825856	-0.285815785719989	0.0248837605488929	-0.275305467192877	-0.243298666879289	0.1956032952417	-0.33103503270317	-0.0527064012239759	-0.0999838819518443	-0.286091104122642	-0.158342500232292	-0.182141760655106	0.280727454749014	0.335676711813543	-0.312842826776569	-0.256069991804979	-0.39957432792614	-0.801904674044227	-0.841201677394996	-0.807123955225186	-0.754020646833638	-0.771013390276883	-0.282043084696268	-0.235667520773345	-0.0583782456051773	-0.7653983968334	-0.431655547187427	-0.111191092008621	-0.27480603884676	-0.165594063891867	-0.0780637513624778	-0.0196028812660336	-0.23917004214144	-0.248463566379469	-0.268944077534269	-0.847316206226604	-0.243202261348915	-0.259967726282316	-0.217991094540897	-0.386149478906017	-0.0251237733519297	-0.402682314277333	-0.153996504940473	-0.213920504782891	-0.524539690191365	-0.25946489313261	-0.287306201684454
ADH4	-0.340468104232276	-0.271968709204398	-0.450907157340019	-0.366216731456123	-0.237770965585812	-0.355562858871145	-0.411062950951692	-0.166520293821494	-0.401790738236537	-0.165863786417883	-0.208446481011828	-0.570458920907087	-0.305418179603338	-0.333969928236925	-0.644608510477991	-0.357908518432362	-0.477629178559318	-0.349456672103843	-0.531668632542466	-0.837649325258313	-0.817986441170148	-0.811173342569231	-0.86582871526956	-0.699842100846998	-0.515313997365546	-0.417203594829776	-0.270997964610065	-0.795476605523608	-0.399611962886066	-0.277546939716974	-0.489078861735808	-0.362187482695575	-0.425837847047295	-0.303380283988906	-0.43571821839443	-0.480900009983451	-0.444421535186574	-0.837251027163335	-0.482080049015304	-0.482610219930106	-0.55783731547322	-0.360626385753105	-0.117422762883743	-0.481195020836194	-0.480396243995656	-0.362187482695575	-0.65851023234541	-0.493814249811148	-0.516799474196317
ADH5	-0.387926331092793	0.233882892142119	0.494362462258385	-0.17356456172253	0.355223713736902	0.11580609301721	-0.229845204669123	-0.378035333589242	0.565498842664281	-0.600818856166292	-0.752732943104108	0.342643512559815	0.494022599673834	-0.302697844812629	0.218965035686264	0.262114020687935	-0.256814934539163	0.0935256446830806	-0.106639679875243	-0.266427051835319	-0.0659893055192128	-0.239718566882988	-0.29719820706572	-0.314065745486855	-0.167031589643009	0.154533868031221	0.447551649931594	-0.44308891272541	0.0733289763238448	-0.614423064132685	0.227438869035863	-0.843798645621161	-0.0205564150929452	-0.398733950575501	0.226043509409772	-0.133464367773586	0.351145042551422	-0.137655494871795	0.057545405495743	0.353276366344581	0.459879828493089	-0.221392315606552	-0.941490754806442	-0.559903390956668	-0.135082879700043	0.0453152411218827	0.00770582344295967	0.0400368194853646	-0.169302260542861
ADH6	-0.922609749193878	-0.767628454089411	-0.800550051752501	-0.901610121389715	-0.951640338381905	-0.796492922621425	-0.839689227062932	-0.587469365742535	-0.786360114330926	-0.724731086912919	-0.745278156984865	-1.01240892764465	-0.784348929388788	-0.741213498907828	-0.996245051905247	-0.880760138353829	-0.923020753876496	-0.847804725195071	-0.959033020896214	-1.21800124315725	-1.21113080967226	-1.21834700313033	-1.21425661869855	-1.22564054007592	-1.07010090081559	-1.0489432863153	-1.06016593250344	-1.22003940592751	-0.948924783666161	-0.759634286759705	-0.996860612624585	-0.896141938875217	-1.02306971485362	-1.04557168200326	-1.00669753840987	-1.01536242628787	-0.940539719970017	-1.20143458355211	-1.01619519067398	-1.02269507298985	-1.13678158283496	-0.879137944528703	-0.713366052250066	-1.0946468520941	-1.07684726716161	-0.93892661863509	-0.96583919244195	-1.02418177142877	-1.04396131794077
ADH7	-0.264422292642833	-0.489974315169649	-0.637662381577793	-0.698947880532013	-0.623524414836395	-0.554424979832248	-0.616709257099326	-0.0184290570327323	-0.609198476592602	-0.454782219600326	-0.492126464478348	-0.814937583897203	-0.00225460989499909	-0.497205731290617	-0.783214781225482	-0.594933938712808	-0.693649482296448	-0.630442083788739	-0.759995404651681	-1.10036501429251	-1.10195830838361	-1.11024346930847	-1.10414540434658	-1.06562470256261	-0.779733706337098	-0.77911317517923	-0.704433960298132	-1.06870264322995	-0.654808554739875	-0.438432528463686	-0.733891299984568	-0.566816068410729	-0.633628909372636	-0.649138151547299	-0.716108953421999	-0.72464845165835	-0.700510305711765	-1.11979226458137	-0.643069529684219	-0.721388722640865	-0.752710240367866	-0.589458937531531	-0.381487659398461	-0.836729756447133	-0.733034642801068	-0.637715731655439	-0.848015404449839	-0.735275425300652	-0.783054250799283
ADHFE1	-1.20877089990592	0.357762156399578	0.914955208338716	-0.584761410726797	0.926974276599162	0.123688622042374	-0.103247142345525	-0.475656453920826	0.736326128271033	0.482501519524081	-2.29649920737776	1.13188320976876	1.44858179942414	-1.08174652894057	0.327710132644617	0.589476610375273	-0.0111603696099476	2.02096684894334	-0.622249453673127	0.0161835131807573	0.00736347168129166	-0.255867932801195	0.191020327952659	0.193366312614232	-0.0115713211928743	0.758845243316672	0.978357616651053	-0.358944367336105	0.903356002892865	-0.359251152932133	0.29475392888574	-2.27874458487981	-0.950309229951644	0.509462472777852	0.225395777158556	-0.253368068693461	0.501892037100531	0.542810841492896	0.450774978043097	0.845885579344103	0.300209002810593	0.180824312061114	-0.635173339453548	-0.514448090004266	0.875787272275733	0.711135597070897	-0.786747704275752	0.187449073607537	0.180322225099923
ADI1	-0.143243295258005	-0.249611141227509	-0.0368578998404957	-0.417425002096398	0.133370963063401	-0.0865940881736229	-0.16872374498662	-0.158483335489547	0.0916337956490024	-0.19931236202881	-0.0928846639628464	-0.243569925393154	0.69170084844563	-0.101654603679284	0.0464983743338861	0.0284956079440744	-0.158024437083135	0.246317468727305	-0.165564450703922	-0.0414997355757692	0.0474304213048592	0.0188514811053699	0.190598752645156	0.609914387324644	-0.167145413509325	0.291136493244122	0.264950637666357	0.0794571900388548	0.124392140798128	-0.449348498296296	0.161268930774901	-1.16252209019763	-0.28551179795877	-0.243934701568213	0.125923097020775	-0.0375273652557675	0.0418636168175877	0.245025846216346	0.0197934846154794	-0.120612011182245	0.0603227053530711	-0.0635229717843905	0.150007935889115	0.0740679171692118	-0.563704566991332	0.245899568107868	-0.303598064724035	-0.215187339617099	0.0506448369666514
ADIG	-0.439852979507695	-0.419302788449048	-0.455710168206549	-0.408870780580666	-0.338404299294373	-0.3371483365316	-0.328305820261109	-0.0675063155970032	-0.327803335906817	-0.100399100378578	-0.267695698996443	-0.481089064820577	-0.348531514720399	-0.339240938541364	-0.449028831402992	-0.249984674054235	-0.356462815409281	-0.439940925283271	-0.458052577905339	-0.494853982679735	-0.517201058214841	-0.503228167182875	-0.506946727367323	-0.425290217884563	-0.519717105603562	-0.473382775308975	-0.456998698890063	-0.513269252645596	-0.51571888673949	-0.196856242361581	-0.442014316889794	-0.346633168147431	-0.410580699303003	-0.182922364806484	-0.406604933015994	-0.096309552484569	-0.481441023501796	-0.567104886912287	-0.475558128042456	-0.481641830741037	-0.359979548706933	-0.537320410698588	-0.362845184051206	-0.594686974072929	-0.477036641545207	-0.267081860819972	-0.659899226786036	-0.400947285866466	-0.626608930336781
ADIPOQ	-1.01385860368031	-0.838313491835678	-0.981298028370522	-1.02786817269232	-1.0198095178814	-0.893145399291662	-0.966752757426092	-0.667891211377026	-0.939017475949479	-0.801318714621015	-0.651432040532187	-1.0853917560995	-0.811784662847962	-0.686050664564826	-1.0742998162647	-0.968532788304471	-0.999923032680402	-0.934402798573581	-1.05007385047589	-1.33610750833953	-1.32124120497606	-1.33528252950392	-1.32066372292034	-1.29236366207052	-1.14511157884491	-1.14457676690704	-1.12837127612626	-1.33386155059441	-1.04919421973581	-0.858622459307429	-1.07459415382922	-1.0099651212879	-1.16637305354092	-1.05995529441714	-1.09341888453481	-1.15985035917643	-0.87485174219131	-1.34864257589524	-1.11979226458137	-1.09173143321022	-1.12847218358016	-0.945731518462492	-0.182029808759772	-0.867814392634754	-1.12263929952619	-1.0334316459874	-1.06968523373701	-1.12657355646854	-1.14046016762454
ADIPOR1	-0.0603027643981313	-0.114274019798848	-0.170114407651761	-0.238257681149613	-0.332977946095661	0.134346994981278	0.0590510829932517	-0.206916911405167	0.0393290948680109	-0.0721652660514336	-0.0542273620959612	-0.137521181556435	0.153184210709863	-0.07240777100626	0.14760563957131	0.0157308407953771	-0.105743466408764	-0.0485271625831058	-0.10413916167328	0.319334141665757	0.368335744836231	0.264516711665589	0.273186958834171	0.376613894305137	-0.00477745894229525	0.0808119816985421	-0.233524524488752	0.305983887701352	-0.0408934608253573	-0.108706561466951	0.0209160155394306	0.22298367620416	0.145741170438998	-0.101730986248009	0.0560923759609405	-0.124133186152891	0.0795316535084531	0.462005670724732	0.549616446044464	0.202033120259281	0.232993678647515	0.27649453795175	-0.628118218622744	-0.428306188149831	0.151849009787091	-0.129336666366102	0.11520986889234	0.0439975681685897	-0.0957077183972342
ADIPOR2	1.31840109611231	0.705820721938926	0.333664655274679	1.48020400827053	-0.435769894986494	0.840251622544497	1.34335903068246	0.668147664856236	0.664554144733156	1.08877083086781	1.16211099434555	-0.369890386150168	0.278055429123531	1.40566225717078	-0.402407067109881	0.282654626915674	0.501500827847181	0.946473910061782	-0.771182237397731	0.107038108324519	-0.0882192704136185	0.117009424150863	0.175403839897687	-0.0345173726275978	-0.614588845514834	1.36921227436928	0.0136811653380956	0.394002748714183	1.24426809404306	2.34961449797736	1.11799474262719	-0.578099077765441	-1.02688800958695	0.151097561982063	1.18298730096496	1.94488640591654	1.28816883410617	0.271725389291006	1.8235252901241	0.762085309346112	0.726294419800151	1.23180150755317	1.4582541213178	1.07093602863031	0.862846920395032	0.773212856981067	1.01166593448299	0.760370550146979	1.22939474048775
ADIRF	1.11393171326995	1.12176529410545	1.51670460231551	0.9915142410935	1.87119800383299	0.587734302138995	1.13303238110207	0.862526790059496	1.38173688448279	0.394232703112303	0.758540866221587	0.263808352052663	2.86311735902449	-0.753713235436616	0.426911527206301	0.535885621549069	0.945801715097306	2.31929664015534	0.148347912354636	0.632107736334156	0.727809922099534	1.08322047676077	0.725586431166803	0.593138088499397	-0.29793299886178	0.780675799029596	2.25854113627505	0.314012735272481	2.10215578497527	-0.300232454416582	0.548911825959864	-0.34285676618437	0.101393868030419	-1.20286668311921	1.0383025312643	-0.269248963388019	0.771526699374558	1.47965793028991	0.253456948961818	0.842744833608687	1.24815586878239	-0.719590567789753	0.467591087436284	0.340627215842656	1.05718693508802	0.601013499055873	-0.766536490064714	-0.619948028590276	0.688069707101552
ADIRF-AS1	-0.786691928802822	-0.366148129289275	-0.363576610483767	-0.765421314159494	-0.0859636560690678	-0.655920678960703	-0.368853650805817	-0.279384658039744	-0.409624592504433	-0.243130306671314	-0.319981193870554	0.600431630028774	-0.655692877207647	-0.32570776003729	0.328411945255313	-0.38374932715283	-0.474046719767662	-0.476767610204048	-0.643400295455827	-1.01431198491454	-1.25525223242061	-0.726403632768366	-1.34627836714203	-0.952109239279169	-0.624093955178976	-0.586701802419845	-0.226161983487173	-1.27081266241283	-0.109455869329884	-0.359614555139383	-0.561251106080532	-0.530530270317839	-0.606974941009361	0.0676423717136422	-0.530756032962014	-0.681873489674462	-0.478911657871873	-0.817878687326591	-0.695697501572591	-0.585831283029831	-0.607785532931878	-0.386718795431522	-0.79614352829604	-1.04959061810387	-0.615790461250131	0.0962280197674139	-0.542480502065618	-0.584303548643182	-0.566688406589861
ADK	-0.620859886304505	-0.376020802720642	0.0858779629645078	-0.605332089392766	-0.373214670313956	-0.0490809702041254	-0.593724215841295	-0.529966750922761	0.00688062387679869	-0.449505670059211	-0.435297670180919	-0.333969928236925	-0.348579051203765	-0.36039872144149	-0.317357149355771	0.0412730121503105	-0.343763810794373	-0.637758420049281	-0.393714040637139	-0.250999901989823	-0.344284667001755	-0.348275454706209	-0.385292449105677	-0.230690386999343	-0.269248963388019	-0.307744860971488	-0.438339888604466	-0.572429764851783	-0.363245052699295	-0.541365024182133	-0.323060577702757	-0.097003775828304	-0.0898649135888331	-0.408304043735024	-0.349087718321797	-0.278668736304418	-0.0553308781469993	-0.309803122598231	-0.397026937975417	-0.289924791398239	-0.15130874832994	-0.293221234858129	-0.748907559070089	-0.408915704740956	0.00284795692908258	-0.444618161117542	-0.180168005180429	-0.102188752860451	-0.558673459861855
ADM	2.42539995457651	0.811158776953142	0.18674926330369	-1.04698652050014	0.544482205734992	1.62666761216932	0.264287434876627	2.18402553486188	0.47332386644869	0.479567776431565	3.33974970916672	-0.266391063834922	1.02504244276044	2.21958561999248	1.17045765512557	1.61061479034433	2.39142912543983	-1.04498470695223	1.78644385884372	3.4806237456464	2.45886615323233	5.03355914145627	2.59111364720967	-0.131424663202499	0.126832934670026	3.16966020569332	0.758105678336818	1.67991464362498	-0.205647628097668	1.35796055606238	1.88562156758224	2.24416553583783	-0.255867932801195	0.650095895881972	4.51759836906748	2.12233863334939	2.57337723731382	2.94819843302521	-1.78652027766693	1.33816491865899	3.32016501881406	0.603767983173858	-0.0361760853745798	1.73553632304451	0.120718310898677	-1.63459963233246	0.662342631127015	-0.350699166443425	-2.09696500057742
ADM2	-0.15750668578413	-0.205025352710958	-0.150219326109666	-0.314893683468086	0.0917901542974463	-0.682401943620258	0.144200818972227	0.144731188642095	-0.275516594479071	0.0548391954415061	0.36009272489051	-0.0843159247679502	-0.177404919056625	0.0847796594600491	-0.062416190499323	0.282537341022355	-0.077389447668735	-0.269480397402608	-0.193040309348457	-0.538356779153515	-0.560205263689756	-0.437305701087502	-0.526828359467829	-0.368668658778375	0.450774978043097	-0.0958486984148424	-0.0145638483711992	-0.501050454391828	-0.363018049092398	-0.13859993534442	-0.144675475969983	-0.0540824765345738	-0.366715229462631	0.149628283757765	-0.130576934117633	-0.111263611661314	-0.0973207008981109	-0.585407623218633	-0.181980668807935	-0.0613630321425752	-0.144413676555941	-0.126726316429156	-0.792095757835549	-1.37294710810547	-0.0738993191622047	0.0300237293983575	-0.281717452138828	-0.0880334085605814	-0.118430711453353
ADM5	0.202846649892683	0.0514285589740065	-0.301526562763235	-0.0837832439586647	-0.274358017241919	-0.0555561441776636	-0.229072849048426	-0.0728044736980913	-0.355909475561887	-0.152159870927201	-0.0827395871859409	-0.339298894150205	1.05714137125285	0.00903624920720733	-0.337450625163799	-0.191083894875039	-0.455826617331291	0.202846649892683	-0.888614592358345	-0.423385095157384	-0.0810284998557301	-0.139137406187179	-0.364621778302974	-0.0392300298954603	-0.0436214475891549	-0.187238403460087	-0.0631856266738944	-0.135348567852257	-0.0252825412548424	0.524264879285951	-0.661385640137768	0.483371490149842	0.00556518964001245	-0.00879820641772883	-0.0290321989601657	-0.0734400524728058	-0.0872405948048856	-0.302719383763226	-0.0804623223831244	-0.0740565336058542	-0.06287623729772	-0.0548736082957824	-0.0675104491847715	-0.672563240247857	-0.0604518757189107	-0.0575309968056863	-0.275598412957593	-0.086561756215491	-0.0623330993627926
ADNP	0.306959567945276	-0.0548829803578384	0.149816002439292	0.144200818972227	-0.261814034342015	0.117572778385983	0.0934383611975657	-0.88717008118996	0.041073410735618	-0.417973700469328	0.179990033764967	-0.236274809567005	-0.1333259237087	0.253465475787894	-0.34881141107807	-0.0734638911154406	-0.04704315495618	-0.216442883189393	-0.212305409609189	0.0610796515792191	0.350875966193124	0.303217513277187	-0.0605646562725789	0.0397982053870193	0.0416411850244543	-0.154875717150205	-0.161432050260493	0.0860134230623685	0.265529113113106	0.39560313401048	-0.0239851344890506	-0.576712930675566	0.265529113113106	0.131965714433043	-0.136311716602639	-0.118502922073046	-0.165235611875429	0.246668070657389	-0.131424663202499	-0.128976374847828	-0.398639571613451	0.14734177898764	-0.119437704719915	0.120621708564273	-0.221457562753983	-0.227179604241361	-0.0952645631420051	-0.213639702261249	0.010275676043537
ADNP2	-0.469188994527622	-0.411761317613032	0.216335877714913	-0.484559286843583	0.0351130642353397	0.0495292274972934	-0.342935582004781	0.0871229089668184	0.0544865768791603	0.0632304406926562	-0.242536545922852	-0.0319174978925001	-0.049505193145676	-0.2062850797206	-0.517550476944943	-0.449028831402992	-0.285444175465651	0.0236997666328332	-0.785030739445168	-0.0349874776169486	-0.175400562159457	-0.15187047049559	0.0743402786682244	-0.198221871039742	-0.453624578843687	-0.188753918534566	0.13309813913939	0.0604764432647436	-0.0438846638052314	0.325473734144775	-0.335864318747418	-0.00321318299706318	-0.153628293826811	-0.152842584599426	0.127200235301904	0.17931609039384	0.111677584623465	0.25805345059174	0.0396140931213956	-0.417826335376164	-0.467854836593224	0.35703075292325	-0.247569102294053	0.0252842319516793	-0.283610873122533	-0.385550474023476	-0.100022248475009	-0.363245052699295	-0.567002575519466
ADO	-0.253769938594593	-0.306051382236438	-0.159401348838544	-0.200070550136935	-0.774589140988335	-0.0201192399495337	0.00933611456034124	-0.972286999630647	0.203375766441279	-0.805174607583395	0.469465996023112	-0.354756414789867	-1.1165229111674	0.64824683620791	-0.478641845477023	-0.358601146605664	-0.161932072614521	-0.576117799083107	-0.735378681931882	-0.279820220718593	-0.235129621146135	-0.246111734524355	-0.261352781437784	-0.315379182728558	-0.254115442167498	0.59595360566345	-0.772139728325774	-0.126438040369209	0.146417861109936	0.320296270494574	0.0362923606161421	-0.41767166905417	-0.26910103873129	-0.252325264443692	0.182991750618831	0.656000867593019	0.458099486394186	-0.0753048687765099	0.19797396590387	-0.190801629799528	-0.553576728892586	0.632367990221613	-0.917100099017309	-0.215343526313265	0.349855228296472	-0.140856614318296	0.517070843584631	0.493428366554685	-0.0895559809519451
ADORA1	-0.128943709060196	-0.67150474311321	0.0820471244667179	-0.1493284339906	-0.297318174443621	-0.108678617704036	-0.197330803232673	-0.396854084348788	0.131991058992819	-0.137831901991399	-0.322232329631787	-0.388627874820979	0.0638685595366781	-0.125363438865513	0.119958319727222	-0.253529997943032	-0.256751002238109	0.273934467227534	-0.401285628733284	-0.00657007156457503	-0.301312428249914	0.0642291442420877	-0.0902234448766268	-0.383476888958533	0.319334141665757	-0.00104321504833855	-0.345896750282394	0.0586218801164257	-0.0239851344890506	-0.229284375078585	-0.101675136774105	-0.718532256894669	-0.275910123801508	0.147843469171574	-0.114048466278119	0.553644857914022	-0.176216927272062	0.0187743543099676	0.126403870213518	0.183977057081844	-0.432614299351798	0.489062634830482	0.118906830568426	0.54936375761696	0.389072362523616	0.139568337933477	1.09725342494045	0.547935627521109	0.41338260203655
ADORA2A	1.44462854529369	0.298695928407341	-0.268620505983116	0.534843153333379	-1.04728427238158	0.275540759393516	0.840251622544497	0.332699130032088	-0.0903048282694755	-1.11160223485723	2.27310797010117	-0.59379979646439	-0.302105401918479	1.00243185612524	-0.606475801850866	-0.714561126335762	0.983278283595176	0.25891546368298	-0.270581943306826	0.1827461443044	1.51786067841567	1.29089833815585	0.77687399598865	0.834689378669005	-0.973793437494348	-0.362187482695575	-1.0100529358294	0.997550279396028	0.0237072918793457	1.42809473627012	0.356236430721522	-0.595828649295313	-0.378829718964155	-1.0278214140706	0.131384456235771	-1.40779093526144	-0.825595429030801	0.34864025643275	-0.0879693346404777	0.376009214765274	-0.26330545052232	-0.268372931813545	1.24526326370855	0.429895012538487	-0.586799861070316	0.25700282474604	-0.17931295851377	-0.539798806636572	-0.0949048272806645
ADORA2A-AS1	-1.1299500489838	-1.1630788241949	-1.17877696388425	-1.34311883153312	-1.36780873458397	-1.18378914114014	-1.26224303040181	-1.07759434790834	-1.16095232916876	-1.21902469621135	-1.18101247657222	-1.41740199804644	-1.1198508025964	-1.08628893871997	-1.39640175558317	-0.932930011048986	-1.29341588130159	-1.2462324769299	-1.06734966773597	-1.50318908096324	-1.48956690915912	-1.53619298108732	-1.54939966355728	-1.52865838122167	-1.47203827967094	-1.48154222963586	-1.47143179548151	-1.55274152958302	-1.36247953851419	-1.24006786911992	-1.380518271669	-1.35847362550882	-1.47094123728425	-1.44353916317653	-1.41253249192902	-1.47567526087737	-1.39028349867984	-1.53108476396682	-1.46140488152207	-1.44374150986308	-1.44331881405751	-1.27203224662314	-1.15531712696249	-1.47791560076827	-1.49006583100539	-1.27701647861166	-1.36561383810601	-1.4497698080344	-1.46268062498139
ADORA2B	0.0476102755385731	-1.2356605869714	0.00760744500175285	0.0186714265945652	-0.421638277842073	-1.90275250329214	0.196054133644032	-0.144629827525948	-0.567116542951211	-2.16601147853498	-0.233816438055905	0.923668718248828	2.57138629729761	-1.75109076164927	-0.0293887080453817	0.0917901542974463	-0.640410899805512	0.819177879456979	0.680702325850215	0.379276474369776	0.202779716583272	0.934384136600881	0.00147880240836095	0.173684791957484	0.975173236206263	-0.312946083691269	-0.292955902681529	0.112197486377052	-0.298728966301087	-1.91790522314149	0.0587807453377094	-0.894725001246451	-0.587445425618974	0.507506657705876	-0.673178976056197	-0.326102014493084	-0.589340961529409	0.38640677875483	-1.46455498992455	-0.836354744892636	0.924433465348126	-1.67347588093441	0.354925849677391	0.882543383990451	-0.520653427159401	0.302070856243078	-1.91509936698472	-1.58003020374845	-0.704344288258495
ADORA3	1.06084770762295	1.56264824651304	0.00141700074524118	1.4782534378249	-1.05148173019664	0.766665050539759	1.69525861656922	-1.5560219377067	0.559674824107918	-0.241861449825175	2.00368610374335	1.55378887934715	-1.01582690294292	1.10632171066072	1.5186122874021	1.48711033274149	1.5815638187431	0.37414851134535	2.05987026403466	1.66678785452844	1.79406118982703	2.08968749232419	1.07093602863031	1.55901320225603	-1.96936739452096	1.35431670572653	-0.50684538510288	2.57337723731382	1.14986083166331	0.61221994807554	2.41323728646291	1.39736243246392	1.09524799593506	-1.57766068570002	1.89675585661584	-0.0592850738139625	0.629229451005496	1.38098110267917	0.722741177490803	1.76317135351069	1.70472636594657	0.730078273711427	0.114264231462422	1.58674928132864	1.27158623526608	-1.90121273659552	0.626488960296003	1.19669907615713	0.972874915822631
ADPGK	-0.0806129728245079	0.426755141903356	0.20606359403088	-0.112883717303019	-0.271635801378403	0.374726478372077	-0.236770880593834	-0.277095709669181	0.352006179292132	-0.0501246381926245	-0.135769484721774	0.516785901974923	-0.327885259299827	-0.0468637226185029	0.557117091767015	0.207748749168649	0.63628956050872	-0.193324189469241	0.607466740838577	0.574291433242129	0.350773349667431	0.137026847254644	0.372301664903276	0.252893097502657	-0.0231341542447792	0.290724283523783	-0.25373940061338	0.244930804976878	0.102330566400861	0.283497527835316	0.372051219193664	0.342584815096773	0.1581395379568	-0.441217764339296	0.121086685219697	0.118823623082844	0.121516278897165	0.0742813782995478	0.275217903972802	0.377333807081528	0.564086517972291	0.487380567156062	-1.26831562538766	-0.080717337263052	0.330483265107769	-0.18227414213253	0.628658723396525	0.43452488863925	-0.16075154431321
ADPRH	-0.0705030669529262	0.356041510915411	-0.121111739931987	-0.238741419884568	-0.44051860956403	-0.352745095378496	-0.251445301157247	-0.00442350667691174	-0.17333790642421	-0.152939120771785	0.0395598365880645	-0.138206895609042	-0.0956638291379247	0.047994047035926	-0.207129551824015	0.0906962470970532	0.190838136413176	-0.136375645132939	0.0733291849385341	-0.233284512963417	-0.284965860523761	-0.251299317915686	-0.0573101881466252	0.107425925504953	-0.527903346933788	-0.272171995864096	-0.492718915570468	-0.184149516722425	-0.00470646930170775	-0.26330545052232	0.0133893450264504	-0.203573937277468	-0.125744246841613	-0.326732831944564	-0.200645532806079	-0.451547493291882	-0.00697151612383266	-0.312946083691269	-0.171889507810161	-0.194904767613036	0.293783099679675	-0.210822374927881	0.107654068348636	0.0507156855962191	-0.331701373986234	0.206610469794205	-0.506683691357877	-0.300659262353031	-0.273314826337523
ADPRHL1	-1.02280867167989	-0.962272025637316	-0.737412969581283	-0.701663657219326	-0.985095667732681	-1.21417450765606	-0.904943939143006	-1.06401294006453	-1.01279344045266	-0.901610121389715	-0.672883636546696	-0.556382176345097	-0.647280227153487	-0.701293732700113	-0.639185629593726	-0.858782860171327	-1.17739534262297	-0.464474030632964	-1.0710983623541	-0.666637217447756	-0.477339136881111	-0.62451479727554	-0.604010055383458	-0.491017052098237	-1.02505722325876	-0.947347739317103	-1.06403016882109	-0.702963548438737	-0.824658886112226	-0.550982929339349	-1.31453277108595	-0.79882523676023	-0.896374810329864	-0.762785841645506	-1.08812550995457	-0.498516568202539	-1.02216458759629	-0.651433457720878	-1.00262563262257	-0.917528069639685	-1.36834026864129	-1.00897306100784	-0.351445125603792	-0.465677128313134	-1.07748866973825	-0.855961010400248	-1.03024226309246	-0.896260118573861	-1.05731139752826
ADPRHL2	0.214140753129742	-0.149093110061609	0.0852732284307879	-0.114652312875518	0.292389777735158	0.119828391073675	0.197798224057856	-0.68505141256405	0.427742017353291	-0.672955483499531	-0.0109686977066096	-0.139470539028648	-0.439001454881961	0.377445427999506	-0.0948716076811189	-0.366983742518218	0.0536998101764035	-0.0458758884605275	0.370866866991754	0.18023742964132	0.251163341478022	0.339853631677071	0.291018389148788	0.105813061109867	-0.348372178830677	0.197396117208676	0.225395777158556	0.449472107638692	0.220463728894823	0.823995685404154	0.268900229669915	0.118144791320051	-0.188383627930409	-0.257713512858266	0.12799000041387	0.659537437067911	0.102673661660277	0.317682241623852	0.156832470086807	-0.264786449511536	-0.211068034366082	0.484325110361362	-0.000515216699502501	0.182991750618831	0.357930011373191	0.558539294400499	0.271205511219551	0.566502651881924	-0.0763293523560027
ADPRM	-0.131565129720464	-0.0508320387332794	0.076177114727082	-0.0890996772384652	-0.00755006325987395	-0.130217721733732	0.075663610396794	-0.145449616217395	0.179384167297993	0.0802498552852003	-0.231744210365723	0.0933636148391432	-0.249023836659788	0.197637797330086	0.211830911976765	-0.448786562607327	-0.0889187527465981	-0.132679665107964	-0.142205379951509	0.0184934037909185	-0.0204809970862487	-0.162588790626209	0.0545783882019425	-0.0785161676565396	-0.121091464874752	-0.183209100447159	-0.0212803946322079	-0.199761110712149	0.0761156821544725	0.0667222008673863	0.0710408027055419	-0.0536279091602934	-0.0374051098268837	-0.665601433993429	0.131660833748631	0.112550195766574	0.252893097502657	0.00312669363579612	0.0550442199864284	0.0444355382668439	0.421161712705867	0.161801581616137	-0.630013877220658	-0.155859968705758	0.0787190732955042	-0.157027050703904	0.132852221710934	0.296123159299967	0.154533868031221
ADRA1A	0.401003101080824	0.0765384041910123	0.244044525751314	0.593596075123843	0.23854309538361	-0.0017231414793016	0.262735479391348	0.923668718248828	-0.0328702812685021	0.0633329606260525	0.0847796594600491	0.20090011823623	0.0871229089668184	-0.531028170333084	0.253465475787894	0.346664353226262	0.909639277097775	0.717445650452885	-0.0736407827845582	-0.30015117358792	-0.176216927272062	-0.451180930175621	-0.332750868518128	-0.382228937197406	0.639388444193324	-0.0175751544824465	0.157006635536651	-0.333408468540994	-0.399369491968112	-0.214883570294973	0.650372219147906	-0.422453848939349	-0.0722833541702763	0.124480137869099	0.266079367652784	-0.247795320781924	-0.295625665393238	-0.641376504613276	-0.544712246019009	0.892818114552482	0.673333406949136	-0.347150347519096	0.193171160173877	-0.227863045724289	-0.0161314921897135	-0.0688105016869814	-0.517517297014576	0.0478820679665305	1.19332811628239
ADRA1B	-0.855189764108067	-1.20181165559079	-1.29085690579984	-0.809889091906966	-1.28403813037601	-1.05883870236974	-1.19041410135616	-0.930664230385935	-1.19041410135616	-1.13802487735967	-1.09972784165788	-1.28151671994171	-0.67498100210637	-1.05589974271531	-1.28106416413514	-1.21194801209201	-1.1874920789697	-0.729892512872823	-1.34854345224194	-0.580074012271177	-0.578870688760785	-0.525903071811101	-0.561358356798584	-0.40422656413701	-1.37559647599457	-1.39362876493162	-1.39405136261786	-0.356108690057587	-1.24056260247087	-1.13990445967712	-1.25819761048815	-0.492201261924377	-1.40915422027241	-1.40139467586148	-1.33178963134589	-1.35488581005391	-1.28364313686687	-0.610275431146766	-1.35875227431436	-1.34671418536584	-1.19000756443037	-1.11009833416269	-0.707579312602737	-1.01049431776688	-1.39876321808862	-1.27757630171606	-0.635173339453548	-1.36230139974755	-1.34853240361611
ADRA1D	0.0219454107680088	-0.275361639900364	-0.639975249241505	-0.106639679875243	-0.563969930718718	-0.248668229489263	-0.288012711841153	0.234744543159639	-0.377494740463584	-0.236140689957984	-0.0810843446589603	-0.434258201534314	-0.0891673967904428	-0.317066855912282	0.571139227137963	-0.138414303482869	-0.319324738539382	-0.416975436436227	1.89824462296041	1.021881079447	0.656000867593019	0.988143429803835	0.817551586138684	0.45146573000354	1.77136446729906	-0.699222580339841	-0.659649921261294	1.08538054922949	-0.525583277147367	-0.27428570422805	-0.538614176996915	-0.296933558215873	-0.341420190337028	0.187076646190775	-0.511597351576914	-0.32124021127479	-0.668710240345814	-0.0103977883737908	-0.606321561562909	-0.0242203930809699	-0.347002815956385	-0.382164507613733	-0.5296063056897	-0.96610158777187	-0.393853865260962	-0.299464943833172	2.6661942266563	-0.387383390821189	0.0454612066623008
ADRA2A	-1.30011570621172	-1.62410425857054	-0.997438283100087	-3.61500551880731	1.77805054396714	-1.55254666832643	-1.89458260439976	-2.08691108911308	-0.917029686380762	-0.731128324384979	-2.83999189503557	0.583432323313441	-1.87718898736611	-1.75602767574204	1.16000091114406	-2.86788088453595	-0.493542024238175	-1.63626041786551	-2.91099685568318	-0.35662330611933	-0.371990499636272	0.108335934960789	1.30584356925692	0.255675775972653	-0.425464445857944	-1.17427874280912	1.30460947628312	-0.420946906085264	-2.00399897743159	-0.134388274564409	-2.21388309630684	0.245899568107868	-1.11009833416269	0.184905755215128	-2.39252123578594	-0.415294316887168	0.600721676160582	0.347493891929691	0.860252246057708	-0.375041291998665	-2.52921132801807	-0.352010617606035	-2.1431901900145	-1.22265764576166	-0.999255154978168	0.0440707162562532	-1.94177087469145	-2.23570195241308	0.5934043375966
ADRA2B	-1.17361600518136	-0.928151902756133	-0.923128918562244	-1.126390499573	-1.14175284731959	-1.02124203948931	-1.00216027828341	0.0913069976556379	-0.935251442094962	-0.966844863346002	-0.872479579881394	-1.14931504633523	-0.913653673814086	-0.915872857552856	-1.16227450636788	-1.00675053021862	-1.02706107842309	-0.951309175350751	-1.10183925143639	-0.0560217658036451	-0.0350461221205316	0.119106972479793	-0.0115713211928743	0.140424952746889	-1.23762479678619	-1.26374005959872	-1.25601259634754	0.109255390619835	-1.05823990163842	-0.641330323485917	-1.12195116560081	-1.1143266924433	-1.27667621240699	-1.25706561511959	-1.1637914522305	-1.21545464402408	-1.09166583639041	-0.0687322355444196	-1.2099112518228	-1.20088292664758	-1.24056260247087	-0.998223480501458	-0.970054767563202	-1.24448135661783	-1.24071308743448	-0.861864891297587	-1.11033487723041	-1.11061947278987	-1.26328431523061
ADRA2C	0.373039016737595	-0.024811300196708	-0.187676886991041	0.0682020530546351	0.00500461214220451	-0.05186906941003	-0.0249342390637877	0.556205197479243	-0.392884087476066	0.0243211350397001	0.283335999567172	-0.400910743185416	-0.13984358048484	-0.142590842196868	-0.0351337181726752	0.0937953420629251	-0.178045703243124	0.00379086960640097	0.287256372365347	-0.521731734176011	-0.482989452931377	-0.409444514256899	-0.617452372095965	-0.300493295123653	0.0283621372573759	-0.394314322994051	-0.0541487904721322	-0.480505314477119	-0.291312587062817	-0.0196028812660336	-0.0947607887886329	0.0379693282239708	-0.093321840722742	0.727413806542632	-0.132877009128678	-0.0618120455320908	-0.0791735077129403	-0.498801944376687	0.0927237939140022	0.0394585269561297	-0.319285977671631	-0.5300006795573	0.0809692845974855	-0.561358356798584	-0.0393655450639369	-0.0308555601986885	-0.377352812396638	-0.33696230290494	0.055902256599126
ADRB1	-1.03304182867665	-0.684132500612402	-1.0324976637602	-0.958351048485914	-0.940124881173656	-1.43925517862651	-1.0608387175255	-1.21071265544702	-0.998847428899307	-1.24866702349267	-0.849084430657481	-0.470104520287123	-0.147133357199431	-1.22785152594726	-0.504031795965434	-0.91973972744448	-1.32143607135253	-0.730184169764837	-0.661442499885381	-0.996508598113862	-0.913092660188223	-0.764759075502162	-0.909185320578165	-0.969296441717039	-0.99961117214889	-0.851686001751707	-0.962291870468468	-0.797848523884727	-0.675730487131761	-0.952109239279169	-1.14804289702387	0.494668333898072	-1.08081215919026	0.221961880600006	-1.25133337648329	-0.838207575720475	-0.846090168387744	-0.924711583865809	-0.803193856236925	-1.5412428014567	-1.14200764285768	-1.27526576254293	-0.372161424231436	-0.469789802120677	-0.993758510840519	-0.969296441717039	-1.72753285073093	-1.356099399103	-1.17614606828547
ADRB2	0.529632553303993	1.19987805950335	1.4077313787006	0.936142762645275	1.3044410095394	0.549938802352616	1.02447285353269	0.977398400644987	1.46411044435257	0.19109956672148	1.15787204057449	0.930961304475372	0.899107321522025	0.626541521498243	0.797276292678471	1.53069693047249	0.981337125371528	0.561564233941689	1.4263658263608	0.863365879250206	1.50601260379362	0.979223420726605	0.357393296451328	0.982299684727386	-0.219181138046665	0.875787272275733	1.30725091531957	0.888125020391092	1.21175957905988	0.462196348202453	1.15311540160194	-1.19759542254391	0.744196781397548	-0.808143053618999	0.377333807081528	0.400622257134703	-0.0429451136772846	0.782971282308435	0.367703042505392	1.59463901041716	1.12715817589754	0.247117098003908	0.268900229669915	0.0547378789651383	-0.0991142310304883	0.408529327389118	0.645193935646166	1.08954729752799	0.56348115919106
ADRB3	-0.329137673316953	-0.420233870099208	-0.485949573831767	-0.385310391865054	-0.514663669621958	-0.335459458002068	-0.514572775971638	-0.302199531977962	-0.441164503387829	-0.154138269194443	-0.256069991804979	-0.749251318201185	-0.324842078422692	-0.42009701665139	-0.653489524615203	-0.273335605514691	-0.473902805175186	-0.263319597074453	-0.595320688600122	-0.673885457039346	-0.711477129219754	-0.677254557930294	-0.671944646915474	-0.642628280822975	-0.644633568678084	-0.773697313348248	-0.758764845216292	-0.671685155233898	-0.63308135331451	-0.498056380002072	-0.659381065510642	0.383433744748578	-0.788253120789297	-0.451180930175621	-0.668827236506022	-0.557607191911911	-0.644187786754822	-0.69610447174532	-0.753373034984097	-0.761082881404036	-0.744888290493533	-0.553219359053068	0.361008520030511	0.34935799693335	-0.803507345542595	-0.651149964190736	-0.724155988400861	-0.753645872013052	-0.816110892439714
ADRM1	-0.239329827025797	-0.485530638243134	-0.203273121599301	-0.102619738772045	-0.434305683248167	-0.573388552077072	-0.195840704543483	-0.110090964787777	-0.278634806526657	-0.21094858570979	-0.333756763423764	-0.13351675577379	-0.0656442277602372	-0.150663585316109	-0.272743301279766	-0.72154707786408	-0.184225909502028	-0.0687367760222862	0.0267654366325586	0.0684121780653235	-0.147669459645435	-0.0372735003329502	0.319105154443213	0.023826696394568	-0.093321840722742	-0.255020328229514	-0.428377731717396	0.25575906024891	-0.040821977600155	0.0291811024151096	-0.131673192858126	0.532676619321914	-0.771721703487178	-0.273390131153392	-0.480810201031465	0.123188604767076	0.029938147148568	0.00512352535052019	0.0330307734724517	-0.498231186724275	-0.185033601122558	-0.0753514155398994	-0.581150802105791	-0.36359763720825	-0.0310244964000976	-0.144007639658821	0.227438869035863	-0.0510607401474388	-0.347337344310161
ADSL	0.136467881877696	-0.0705654093077091	-0.137067293719733	0.317167738639089	-0.215252186405841	-0.410662791189272	-0.0681187579509938	-1.35617766419175	0.0755519820764474	-1.00039781058339	0.261013454442633	0.635253221779138	-0.281917279739627	0.127339285233562	0.581276353575808	-0.341276265114745	0.181361082703931	-0.289229821277736	0.0933636148391432	-0.0914072404618664	-0.191176218502301	-0.130934830602359	0.127618601002115	-0.0974856082890938	0.46796937986422	0.198791169062214	-0.158900581647662	0.062534072414893	-0.0688746831502407	0.470715030096428	0.285978907170768	0.446903223157803	0.343245967095888	-0.183825799950248	-0.0219040133213737	0.256879812661651	0.297390267608007	-0.15540610897981	0.632367990221613	0.065631397290539	0.027919110469249	-0.0481024490278064	-0.523829968074132	-0.250834960869718	0.0675882317570091	-0.102540147251059	0.300939556248738	0.648020489523132	-0.0175751544824465
ADSS	-0.385379989718965	-0.398698880762175	-0.372390453922868	-0.472718167623906	-0.17141889107075	-0.141410285775106	-0.528466386126305	-0.960841704706242	-0.147843189267384	-0.487380886375629	-0.368171603044121	-0.398698880762175	-0.878062572758534	-0.135425746509755	-0.515770613648872	-0.368597493515746	-0.546119192775027	-0.623202785661687	-0.461590969552712	-0.489905802531209	-0.558106773285958	-0.630416861749685	-0.532089815038035	-0.61153312895786	-0.354881593332865	-0.397114990400011	-0.211248533507703	-0.564253574583513	-0.381895765671315	-0.22286807946473	-0.345962405345355	-0.466206168762034	0.19668955491852	-0.313536655266396	-0.281641882456788	0.199326724914781	-0.280164768328371	-0.455906633960343	-0.448686339554599	-0.396405944724609	-0.473119321976476	0.35284090874343	-0.684212886071911	-0.241946512198282	-0.301160332581583	-0.554013282331519	0.00284795692908258	0.180148494882635	-0.625129178071841
ADSSL1	0.271668752996453	0.152396184231986	0.19274246916618	0.00161386668196568	-0.390615146326803	0.322770448059345	0.253571032038801	-0.114421303160415	0.269521766601943	0.108426355806119	0.0396053419270977	0.98267746503237	0.330550776221393	0.290723016255947	-0.222912621866817	-0.192563360327143	0.19935980237022	0.132440033691095	0.0895315726335027	0.796959935768071	0.294886992635674	0.640651571893012	0.566502651881924	0.559305234531856	0.340175592128213	0.678842375211638	-0.273390131153392	0.407318829517402	0.683763213551817	-0.0133359364177103	0.475611794484784	0.0254058623449465	-0.80699366307825	-0.0290321989601657	0.771526699374558	0.654200769981503	0.701958840120959	0.688069707101552	0.1769347171682	0.357275936898385	0.721858958110027	0.801978687521952	0.0975097945997714	0.221224536747314	0.668469430951584	0.346853343598028	0.811133431591406	0.838853534591608	0.145090129723044
ADTRP	-0.694518934597184	-1.04860967371654	-0.579199705074825	-0.869360881395929	0.223135892321504	-0.599512986514635	-1.0452641047204	-0.770153416406838	-0.645631845909715	-0.419774540974376	-0.864936655404389	0.283442344330538	-0.995132663978227	-0.833922688337576	-1.08817940124533	-1.23779485274392	-1.08651987213919	-0.701420863435308	-1.13262304871273	-0.739859358912747	-1.00165707283882	-0.876650461604802	-0.0896921116606363	0.531145421473417	-1.04959061810387	-0.892462081009031	0.0215271236360025	-0.844989745121613	-1.15186719193233	0.0135214546767941	-1.41605032435163	0.150621180445939	1.14114601881634	-0.439303322396962	-1.17005831248339	-0.0258210454179401	-1.32926556553352	0.0502279592518483	-0.67849112231668	-1.47424884310946	-1.24997239405762	-0.164975253793528	-0.52026619933651	-0.67991189806283	-0.285117191709356	1.41983554866135	-1.39162967635108	-0.0701873060979882	-1.54402796990176
AEBP1	2.13334176650846	1.91527417546874	2.88414177191621	3.12798035034545	1.36209268793747	2.05355403720134	2.36003207665612	2.65134905169127	1.77805054396714	1.92068869000829	1.06185428521375	-0.433504187822284	-0.013300729611998	1.62067680078928	1.00762555799793	1.6572402191334	1.96942380032963	1.32882884245026	1.52650224496526	2.18275936250125	2.0971320597552	2.18966666276337	1.73232498037915	1.16319953424964	-0.569107415963448	0.936434483760114	1.75149302417218	1.7829710767272	0.558539294400499	-0.125744246841613	2.33759660164857	1.32071411444821	0.477907977070836	-1.5675353143671	1.22807160278531	1.04874511732639	0.809605367715474	1.7829710767272	-1.29621602719356	2.43228112478987	1.68999039933002	-0.778742370220389	3.08321496953262	0.321110982704851	0.67685275876095	1.05290436475295	-0.945731518462492	-2.52921132801807	1.9383688955422
AEBP2	-0.0590443954974468	-0.0303156454841437	-0.280592813236108	-0.0154504109974797	0.617055766608109	0.464529483501446	-0.0738262784044793	-0.100710174241156	0.231236133306486	0.214692468275368	0.28412121327654	-0.324911749096193	-0.160469369728666	-0.0790086039881293	0.0730658044282759	-0.194132300515665	-0.0502728837111019	-0.200137340735692	-0.171004835043222	-0.301312428249914	-0.0151610887039514	-0.254885298387892	-0.213995860237068	-0.0754065089913202	-0.286512561715587	-0.116991273792229	0.540805847800904	-0.245697862802409	-0.246047160503656	0.0449451141489039	-0.0984557099376583	0.128095950485551	0.319885465554533	0.0923421285474475	0.207797566560466	0.202546264767297	-0.0125275479214728	-0.0138314834703788	-0.0101213099046612	-0.152379847702974	-0.157087806217872	0.152299968486115	0.360469335383274	0.258264960100146	-0.187925981131904	-0.190655712145312	-0.343555907796387	-0.301976950612348	0.143310959159343
AEN	0.0724400316706853	-0.216037287611531	-0.463770301647771	0.147799438142723	-0.517948571464964	-0.407844474993183	0.0842397672950577	0.000891109421624565	-0.556671454453825	-0.256885723834022	-0.238419271187053	-0.230182268262734	0.534057405369926	0.12298759292514	-0.172680739612766	-0.293535923648973	-0.199927284643292	0.44131525920836	0.153879043036495	-0.0616077233373282	-0.0648776638981958	-0.0896921116606363	0.147439245837624	0.148127840844611	-0.261620251261024	-0.155594974894936	-0.446768294913893	0.230766767282136	-0.0272081605935512	-0.00606486215466145	-0.359508789548521	0.58790586737393	-0.346426909205574	0.039388594782669	-0.269454138762835	0.350965793530811	-0.218888637547019	0.0227508547928677	0.140524858545211	-0.0478118292011288	0.0129231631613736	-0.381580088970214	0.0996646471646608	-0.093321840722742	0.00579396814862948	-0.272600490776264	-0.430083668894577	-0.156655654438625	0.0356865148592382
AFAP1	0.422164413747367	-0.0147542145514543	-0.321338082338876	-0.379827998432195	0.444446096914591	-0.289041397833566	-0.176579531916209	-0.0972473856899264	-0.487311783304009	0.0838676560373436	0.182563102471004	-0.225837996055929	0.0441301116964469	-0.208556336379449	0.190884217875072	0.534293605621934	-0.365665908119873	-0.0812121183766682	0.960375470395749	-0.576865277661726	-0.671255433816717	-0.610275431146766	-0.6679612147496	-0.511401469457606	0.89463472064955	0.0150802663083362	0.296624243236918	-0.814910972788189	-0.297990684304349	-0.00129784626315195	-0.338635510284769	0.766070013447218	0.701958840120959	0.729776304977376	-0.316474460652824	0.00835016637008934	-0.265371865443224	-0.625846178804612	-0.136661376411243	-0.114538326792253	-0.294889663283668	-0.303067050439251	0.118982156615617	-0.172267460491196	0.0345834005072284	-0.0672699341815056	-0.603916317390027	-0.365668552254059	-0.373419573952572
AFAP1-AS1	-1.1187434373379	-0.977904478851568	-1.20979062603806	-0.577231864243619	-0.748983590471291	-1.00029768646224	-1.25993155072234	-0.928761891481997	-1.19717892801985	-1.1198508025964	-1.08003939716053	-1.05365514581155	-0.955492252339683	-1.05148173019664	-0.60744761054628	-1.18800270720655	-1.21088380777019	-1.04483040671874	-1.26656391729518	-0.805745696035881	-0.819768641632029	-0.552904924229908	-0.821020983011056	-0.711091159171016	-0.929371725985612	-1.3603859861725	-0.842442920592491	-0.7970315611739	-1.14959446946708	-1.12594375638646	-1.31121261006273	-1.24828945421871	-1.38420937552735	-1.26100369317187	-1.29062505269736	-1.13518462426288	-1.25015098771815	-0.670596538195526	-1.37228642987307	-1.36247953851419	-1.4307691133153	-1.19747438332159	-0.363494927482108	-0.580282505042949	-1.37158459773596	-1.29328695893864	-1.16481526156302	-1.02046218198025	-1.34488961315082
AFAP1L1	0.0640378491161421	-0.540841286107913	-0.0489601621671634	-0.367408713975155	-0.834145658324659	-0.32146883809409	-0.197953948990911	0.150795083800227	-0.575688016563052	-0.342977910463757	0.105955286181525	-0.627158994760258	0.0558320865485042	0.202948821920251	-0.498034920908982	-0.274827677550605	-0.276502081368907	-0.086127460247737	-0.428358430966651	-0.449579541235664	-0.43825723833232	-0.190575414859628	-0.328896530981306	-0.0246883890533662	-0.538146356628905	-0.533715576922841	-0.996706315586649	-0.235207249500964	-0.285055159443809	-0.130135685693063	-0.348949703944395	-0.260934921480837	-0.789123948517802	-0.492718915570468	-0.394388631945352	-0.830898251036311	-0.418340660749915	-0.0732359887795714	-0.619616438582787	-0.720106148068536	0.153484476787082	-0.308488496664693	0.349596636640032	-0.253490304569374	-0.832320606419857	-0.667530497454428	-0.51928180549262	-0.352420696995956	-0.736558696415291
AFAP1L2	-0.682941319202047	-0.422795444084035	-0.510871077656199	-0.206567133594819	-0.215495132059952	-0.868678321224358	-0.698040536112344	-1.45776145035165	-0.257245455419434	-0.669289832864664	0.862966129253934	-0.507586136254911	0.569526075157208	-0.501216241669726	-1.06585972804527	-0.284220877024056	-0.402473336172571	0.0981154893493602	-0.952747978054291	-0.55089440401657	-0.285995540344271	-0.558441932651002	-0.877765997112871	-0.401449201496276	0.659047937860765	-0.544103577473455	-0.106822384700643	-0.289019419335633	-0.303294590822111	0.932424806312913	-0.368997057760202	-1.41633487558908	-0.506469656300674	0.176647786632989	-0.871440830912075	-0.820393038459867	-1.0400612226571	-0.243202261348915	0.0545783882019425	-0.57787157134163	-0.904688052711682	0.119188471590312	-0.148010431749354	-0.614423064132685	0.32015845683359	0.369333189778065	0.0318246366395485	-0.0551591559288064	-0.650074726926366
AFDN	-0.233871356252217	-0.232232938626313	-0.185157305636211	-0.334194241104576	-0.468359442032569	-0.203527190116963	-0.359408823526949	-0.113930267309452	-0.0854135536308463	-0.175415055021028	-0.283689873310186	-0.260144774485569	0.101349883512019	-0.235276396258609	-0.212172360057691	-0.521178158875727	-0.15274981803386	-0.272339276405888	-0.363888040018512	-0.467854836593224	-0.529244513377216	-0.467854836593224	-0.44319924760288	-0.534134635559938	-0.23917004214144	-0.215120684181522	-0.50185173267366	-0.622491777072726	-0.0798162956893275	-0.253878939543967	-0.315133341247882	0.283028847435269	0.115911574295995	-0.412730669549822	-0.0202637281562124	-0.151818472116419	0.175403839897687	-0.588221746395075	-0.0145638483711992	-0.129466049256624	-0.135798684162066	0.122323702437023	0.213488541092464	0.0578027738411704	-0.353470903546934	-0.501239721278306	0.163874887159119	-0.24212354172112	-0.0466395736975033
AFDN-DT	-1.11230975958644	-0.528466386126305	0.37163646473314	0.595668695721838	0.593116115728174	0.572458537701518	-0.00799829505332049	-0.597957646562171	0.0537827979830772	1.95858968309243	0.0508772101684253	1.23831930126833	0.938259684478325	0.855815359635486	-0.665934392597516	-1.07328219571254	-0.613182447658207	0.219739207174945	-0.526251896025479	1.01314027328796	1.31913602589241	1.08538054922949	0.475782696771447	0.368778975690664	0.528637003940886	0.696487167279044	0.433628705379966	0.420188241957056	0.413548757819205	0.571835705731601	-0.664356577106199	-1.69224673934072	-0.742940354710939	1.2735487057946	0.860252246057708	0.835291298926043	0.648706921884126	1.16426185360927	1.31037361018246	0.816999897016142	-0.469246402035945	0.622633127921771	-0.234149856467482	-0.148630502490665	0.0770638714843576	1.30897308093416	0.653076942932923	0.380681156333359	1.1780936337457
AFF1	-0.0645815744395761	0.0579893712553653	-0.00525306796040828	0.00395793637201256	-0.451956285914728	-0.08603022177324	0.127441602692659	0.335213812490571	-0.140329776556622	0.302451546074508	0.0548391954415061	-0.771405764496661	0.217447164884703	-0.116806076765912	-0.763491310604367	0.142431802582718	0.282999667166732	0.124711129499022	-0.346565360194042	-0.61499923016671	-0.62895709910965	-0.592083006472441	-0.591868138051479	-0.491219828889156	-0.697764710143969	-0.24519092476564	-0.351713123526471	-0.597917332420478	-0.119704756485667	0.0899171520157865	-0.152457601076998	-0.74876854777293	-0.789936994297902	-0.566041259900847	-0.101730986248009	-0.171009260434404	-0.218753396673298	-0.58096296136501	-0.135429566113627	-0.20924680760386	-0.336714076753029	-0.089619901180323	0.288562539635956	-0.0520096343667922	-0.445609708956224	-0.00894046975728086	-0.172828079144298	-0.672321019553293	-0.180168005180429
AFF2	-0.871214550921356	-0.872347637462753	-1.13347120901834	-1.09285045042033	-0.542729483443861	-1.19622327407619	-1.11908543588354	-0.846890004196321	-0.963999958852412	-0.546914421319086	-0.723910952328245	-0.640328739373881	-1.21938109416629	-0.732996181799614	-0.155493828494459	-0.550672831508975	-0.674368964804304	-1.25538132400802	0.268145445377631	-0.378829718964155	-0.600918490132176	-0.440952527058181	-0.172387237853208	-0.418700864645648	-0.417930868649493	-0.669194873276667	-0.580282505042949	-0.552321346930175	-1.11803641874803	-1.0823923325909	-0.716703775612363	-0.365140928415012	0.357813596943481	-0.736804254066244	-0.78527649934171	-0.490486842472761	-0.486371910397729	-0.783489995261123	-0.754278901844803	0.143141449809245	-0.587328228446191	-0.774107969745753	-0.521798494539146	-0.359409628931596	-0.819097872687348	-0.46274675725091	-0.537320410698588	-0.580074012271177	0.461756398397087
AFF3	-0.629019868423949	-1.52568744563497	-1.60340709869162	-0.58692277306779	-1.53999175032934	-1.49941754665978	-0.93734205014141	-1.46126197782944	-1.91420460241402	-1.41463890137617	-1.33115337574432	-0.818650625112046	-1.09986068871231	-1.25232706161801	0.075472489423028	-0.740118294078248	-1.16322102973873	-1.46509781773305	-0.620430034599912	-0.443993820375316	-0.613058740462775	-0.693418970305848	-0.387889185178509	-0.578654824207792	0.933003399930508	-0.990904302369256	-1.67177215967764	-0.192941418506859	-1.75140241456698	-1.69183888849603	-1.45332198410299	0.975173236206263	0.0744245453666725	-1.06083174273367	-1.28850553136147	-1.46933423710722	-1.73216648813833	-0.979575316256914	-0.454515856863965	-0.228390551805936	-0.102303362588169	-1.26100369317187	-1.01667931049623	-0.103619959258106	-1.32223409356122	-1.65629074394353	-0.385805827142969	-1.0031119387044	-0.316574881762732
AFF4	-0.142833131732146	0.423320068416617	0.264557964036175	0.185813647937703	-0.180926472011217	0.204769733299459	0.0270706545092663	0.147923050224119	0.305426736696902	0.169057608675306	0.429064283268154	-0.581835151750546	-0.419037155520554	-0.292012182750115	0.146005713347239	0.575376641765787	0.327710132644617	-0.0714021846761581	0.0302364930722279	-0.710462362316119	-0.747991300326808	-0.94683160229493	-0.584825407311602	-0.973951091673674	-0.37842281318287	0.218070687054492	-0.260040276923206	-0.955214895811337	-0.0571615746998285	0.0699656323329684	0.193563655450924	0.299260935389802	0.91371051349867	0.237416582136826	0.383768077649757	-1.180767150517	0.184905755215128	-0.751676332811701	0.452128733012433	-0.18454529431596	0.570810282339155	0.360011136382265	-0.519413165154736	-0.179463193816209	0.277306010421412	-0.169799425422985	0.0663161608803139	0.0469656491583107	-0.0550361158831782
AFG1L	-0.699892544131325	-0.487549244867863	-0.0793213667504726	-0.680875247481981	-0.544764320883014	-0.568310932799206	-0.921114841451122	-0.388339915236449	-0.545964121190561	0.00668783845371643	-0.462976054923696	-0.809172679324636	-0.707968784396113	-0.61959505597682	-0.722814567376738	-0.548361482661199	-0.636664360096763	-0.453688707716586	-0.685127147725671	-1.12360707337841	-1.19436739663062	-1.09730177215223	-1.14624647084528	-1.17634251130323	-0.76996820453701	-0.483894206487763	-0.657284140095401	-1.13694974238359	-0.681419280204733	-0.475739381161026	-0.578536199037301	-0.575651717394366	-0.762525885103327	-0.690683936101125	-0.772139728325774	-0.240574531457625	-0.548355157724527	-1.13027027244549	-0.600273275348719	-0.594007312891586	-0.730011335299462	-0.42681091859179	-0.577772464927658	-0.824658886112226	-0.762133243067317	-0.627577819899342	-0.398004250713681	-0.782847382818151	-0.683380736573216
AFG3L1P	-0.593353423253767	-0.0365350130459192	-0.208868713130617	-0.0907348979266845	-0.279001282059779	-0.134995276347164	0.0507206791229074	-0.289229821277736	-0.0990182424677418	-0.192926130081017	-0.160999156489529	-0.405137656394487	-0.889394699265835	0.318327820903348	-0.628031886206665	-0.413377530291642	0.0325481991843726	-0.312147425507374	-0.116181261928534	-0.310623474150371	-0.23642596842665	-0.230480589042048	-0.322093133708236	-0.217841152950963	-0.363924681702406	-0.174430069023074	-0.222515224596079	-0.287815653327318	0.213824496880489	0.276188809287746	0.0543704947945341	-0.504329911645999	-0.636800080231252	-0.340547185002278	-0.0724153490368965	-0.638025189076076	-0.494463422099467	-0.266204274316619	-0.337888613759927	-0.620936379578682	-0.473833187070706	0.194260826743699	0.35765206811953	0.14493694763067	-0.0692069560585278	-0.206446192002301	-0.0883006804469954	-0.38629317784109	-0.248110491581183
AFG3L2	-0.299480501044085	-0.692185311403585	-0.440330865557399	-0.043807058007779	0.0601659274863001	-0.177971506603088	-0.322906055996494	-0.856852644925375	-0.31421244325164	0.0279315532747502	-0.695770610836118	0.306650665577208	-0.256751002238109	-0.0381438303526429	-0.273744746423805	-0.447124970418152	-0.155657827721012	-0.299948201086987	-0.0730035626267573	0.0220045156113062	-0.0463652545949309	-0.0128639351117318	-0.0715980854195813	0.110905956484172	0.151097561982063	-0.219592193088917	0.062534072414893	-0.0149677340643835	-0.0203440806022963	-0.528308107013199	-0.17643713525393	0.0877877433161473	-0.117278702104263	0.284393191438948	-0.258964637683961	-0.00669506946364546	-0.0102038651684211	-0.104279790890922	-0.364456987622763	-0.211662922610197	-0.356298202357141	-0.00364778330136126	-0.0318844493434519	0.128780123216323	-0.0518794847672934	0.030573917149607	0.0056279748094146	0.246566840502571	-0.110359963089162
AFM	-1.31793526992807	-1.11418005915899	-1.1990839894645	-1.29635108006108	-1.29910300452543	-1.12169649567597	-1.22114794856363	-0.98035414844448	-1.15204615626829	-1.17272524391961	-1.13458865239377	-1.36462298652212	-1.17826551024582	-1.08800784794455	-1.36198624894198	-1.25491496667569	-1.22154850063924	-1.19413480592483	-1.3211180112042	-1.53566608961875	-1.53819120971076	-1.53534400843563	-1.50418419734312	-1.53819120971076	-1.41441579872332	-1.44000346189373	-1.40948029353625	-1.53041279797677	-1.27975798777451	-1.19878330938401	-1.34927360487769	-1.31139991641438	-1.42123204382125	-1.41484594893299	-1.38823702566781	-1.42632132851766	-1.35037774317207	-1.53510035487818	-1.41153369152969	-1.38210640599477	-1.40483409620348	-1.23519469570225	-0.777667687860917	-1.10237142648341	-1.45232032235634	-1.32626411553673	-1.29681681298347	-1.40876134131641	-1.40296290947182
AFMID	-0.699151723123724	0.667101374246826	0.135212933662114	1.08582019673006	0.958616024753249	0.303581340800054	1.13752926440337	-0.269878610817732	0.263669823354659	1.2942200457082	0.235075919150073	1.20633512141696	-0.318054927123333	1.2355247666185	0.702146790273855	0.592132186303932	0.00348318952578704	1.48165718539986	0.67955048515093	0.374623655384737	0.272741511060995	0.0418008369959633	0.0591084080757743	0.0483490309588363	0.635584732646718	1.69403416596068	0.866576266696612	0.20496075435746	1.3155261565495	-0.455316383464005	0.673603327455581	-1.88665349804146	-0.678018762927442	-0.661747079801555	1.22658023964456	-0.456395253478565	-0.108900363454392	0.277408845340151	1.40943215737422	-0.0774827396662549	1.20061571209837	2.12233863334939	1.23839992973676	0.419773950238318	2.6849252756199	1.89127323188995	1.14545687784258	1.24198924759392	1.34128731553377
AFP	-1.15831998524224	-1.05695040201624	-1.05907539837869	-1.23580224965664	-1.26088953164892	-1.08125465349125	-1.16843303849384	-0.967055302266761	-1.1042656920847	-1.10923406698151	-1.05796651476863	-1.29612197734319	-1.17788266033309	-1.02523153481088	-1.27603857533247	-1.19548665394542	-1.19022705269071	-1.11665532688182	-1.27994431224533	-1.26639899426021	-1.27682995897161	-1.27931261372315	-1.27792445229144	-1.25794451923164	-1.36826315699745	-1.37104444189166	-1.37095272795138	-1.55666545631334	-1.2382032665954	-1.1547798685432	-1.28134794082608	-1.23529872772136	-1.38744923335202	-1.31336354510236	-1.3149160676491	-1.40009945920142	-1.26240181580076	-1.30570951886087	-1.3434720591237	-1.30287538330643	-1.33567212763851	-1.1382652889805	-0.699140900601652	-0.98478349006221	-1.38448591580959	-1.27070170018423	-1.30287538330643	-0.79524138674748	-1.35565567325158
AFTPH	0.181361082703931	-0.267038734743289	-0.415444234483436	-0.116691974599018	-0.110702647418359	-0.390615146326803	-0.233816438055905	-0.415074087344643	-0.476401373996599	-0.355502301129214	0.0500153382540192	-0.0635095619599667	-0.90664826118739	-0.126928216965254	-0.145509284162917	-0.534822434478687	-0.243953820152197	-0.515142115443692	-0.0271986342407167	-0.329717297766064	-0.155471186664683	-0.238320703769861	-0.129034596849014	-0.223930837741129	-0.0129166015749362	-0.340241287816876	-0.0733696538660797	-0.184359357274159	-0.314065745486855	0.25311819508487	-0.194492724142508	0.241952189991067	0.295220661084409	-0.155994387088531	-0.364250529587364	0.25840651150821	-0.656413059978656	-0.363777518423245	-0.112167913594711	-0.368268060862812	-0.118075891158146	-0.29188040967556	-0.52274378512555	0.0113482892610826	-0.100952219760878	-0.630637252830336	-0.0790718114310951	-0.0327398449525563	-0.170296779078095
AGA	0.278939786884047	0.492340733685886	1.3859748074921	0.0512039738721513	1.20709043092314	1.43506851277948	0.228566132103561	-0.0676848240441132	2.19805250274254	-0.0096035314379576	-1.34169093335602	1.61715605155876	-0.132389173338298	0.651365446518852	0.884667736041908	0.524839347391921	0.909063873499222	0.642682109782326	0.341536324755141	-0.163962840898966	0.450110302018702	-0.246335475546372	0.569604641887082	0.415273725143538	0.501684007256549	1.6262081299927	1.12967993238144	-0.218201530747741	0.983103239984122	-0.338484022229055	1.29502151929684	-1.76313031180897	-0.331968050400468	1.34792354303428	0.539209244595827	0.937869685673482	0.961112647877214	0.457799344015089	0.525563696642686	1.38255070382806	0.930949243042594	1.69723963806722	-0.850711019332963	0.123371988988513	0.975173236206263	1.34979328680135	1.2735487057946	1.83682680783479	0.141101521843621
AGAP1	0.0101898850414963	-0.596157707971736	-0.212567196874233	0.167092452123466	0.363485903656909	-0.0217799042782677	0.200253557638409	-0.331613269242905	-0.139421626014901	0.064804523838893	0.179639136759591	-0.282721206418993	-0.64512759197285	0.096183847365796	-0.392930477344178	-0.0203747136621046	-0.269535938053388	-0.0032351093778765	-0.516494382676643	-0.299630608625333	-0.27486362859859	-0.27989508792159	-0.205917422821871	-0.549985262733646	-0.537753834380013	0.234954375952485	0.372301664903276	-0.090159480435735	0.149700722142905	0.618525249061758	-0.149586259715714	-0.0436214475891549	0.248770013016196	-0.20013286530256	0.288789302742895	-0.0624521823932554	-0.27973708416796	-0.224488823464333	0.163592683477401	-0.409530148606768	-0.187461658155763	0.649824752236308	0.265966208824602	0.125684237992886	0.214356353010582	-0.215943471701733	0.16456514661855	-0.106097699570084	-0.15794598740733
AGAP11	0.149138780672419	0.36288708680376	0.821368303701387	0.251055026539546	-0.00191077322757429	0.00911332774087365	0.398366606001075	0.119958319727222	0.054226907680308	0.125750808402051	-0.270632685739798	-0.322721609614819	0.178182706105509	-0.130217721733732	-0.178825432094604	0.479731550199776	0.724857873481119	0.137062645533293	0.0657897046635214	-0.0943223730146873	-0.014514995631709	-0.0986488319451127	-0.0386970807312386	-0.174559911085464	0.113018118576671	0.198408692242628	-0.024485190422628	-0.261781983975432	0.711855179595525	-0.0765410553821318	0.0618966840121675	-0.169103218739465	-0.202595871275586	-0.0414997355757692	-0.128002220030337	-0.258881756218364	-0.227576322720666	0.0311573813797254	0.112383550291354	-0.156132584792805	0.0386288160536915	-0.150076878423834	0.88615818391357	0.855727969365297	-0.174782078806717	0.0738734267041402	-0.184013085862633	-0.214193648114485	-0.169456436690139
AGAP2	0.589162347771352	-0.680785592371864	-1.08391715555067	-0.516063586561794	0.286137673197297	-1.84369603389176	0.0594396665517689	-0.164612439110113	-1.77930387790809	-0.349534687336268	-0.362320300765882	-0.304846694961539	-0.550163930408865	-2.05810144507645	0.386598135835931	-0.399778683572858	-0.11838403714201	-0.794183207680753	0.986500752034947	0.158868845969091	0.196980840215439	0.10093261211986	0.24397444862031	0.0907090450311172	1.36162715004343	-1.04765216200071	0.00785545378191609	0.596841230065897	-0.917528069639685	-1.68494441350842	-0.929371725985612	0.425106194367073	0.345490024561999	0.38921775392284	-0.639044196617763	-0.187238403460087	-1.46348977852417	-0.0587580884336876	-0.483238117323096	0.113754047441955	0.0991218104907104	-1.63944116312834	-0.429074692890173	-0.104632590233563	0.0206295986273074	0.0624462818942835	-1.78724226273138	-0.481549890120164	0.464873833639653
AGAP2-AS1	-0.844598090257821	-0.976740787461193	-0.427064388901307	-1.12244116912449	-1.43476578885644	-0.718000524632057	-1.02666632842447	-0.0481588381686735	-0.318992554050815	-1.23642139115318	-0.987307435250674	-2.40655658011885	-0.321961511403175	-0.411619695431446	-1.17904565318089	-1.10283110731888	-0.810093524131608	-0.772032850765293	-1.14796607821384	-0.459092388359297	-0.487661134761322	-0.332406589677403	-0.521498182815388	-0.486478374905028	-1.28198399047732	-1.2834393664612	-1.53140446770057	-0.164266034995787	-0.0840150854586235	0.650372219147906	-0.909185320578165	-1.15683450519993	-1.63272591250646	-1.49555635342693	-1.21052592694062	-1.12740020563537	-0.764180036008453	-0.423581261188889	-1.11342284079742	-1.59050844176656	-1.22489834736573	-0.521414455342054	-0.040703125432525	0.301218923290808	-1.49923201426028	-1.1726395915577	-0.671358042731241	-1.24276201074487	-1.26588876095749
AGAP3	0.132578683121511	-0.779735998017838	-0.930335846156234	-0.207285390973851	-0.184615872111138	-1.11203583560543	-0.0977586884927891	-0.518110280150076	-0.862482133565469	-0.278950954870995	-0.208357010303517	-0.501324771881801	-0.686822253429861	-0.587645994199084	-0.0527064012239759	-0.256751002238109	-0.458258450720366	-0.480322207942728	0.292389777735158	-0.00662426422177869	-0.0233849979292417	0.0516588070465528	-0.0420393904655488	0.0148298691656899	0.289034289354316	-0.632746739738315	-0.193297509547892	0.144329774499616	-0.47013921157946	-0.569658141865849	-0.595226025125891	0.276847477433614	-0.0451205331149367	0.115132427162794	-0.562639813650975	-0.753645872013052	-1.2883148459051	-0.216335394699294	-0.203199869935666	-0.162073562149986	-0.355763294551787	-0.723792502402535	-0.0279938954244511	-0.225198473163016	-0.142219345807333	-0.298657667133401	-0.484285803153227	-0.528206059113545	0.165101794517793
AGAP4	-0.226210410891451	-0.110921978644673	0.0954692043618666	0.00269514950893947	0.181361082703931	0.169223856107806	0.0231044469389772	-0.0650524507471888	0.162345044627513	0.400631748922922	-0.167483749920339	0.208439726617462	-0.299948201086987	0.0299203135087339	-0.411981411039189	0.341375739947219	-0.121240726213161	0.231321831191078	0.122195469556036	-0.286752406708019	-0.331631546537412	-0.401801176130456	-0.373053347580182	-0.265226756256789	-0.109664296665685	0.110816832426931	0.183372185659181	-0.266313870097209	0.20398671847508	0.0544545819786025	-0.139696424805475	-0.403317048527628	0.0614587603320816	0.60006240529215	0.164254705792834	-0.680998701644047	0.1039025367355	-0.216907344610961	0.23666658102717	-0.0292545743171546	-0.210094535850019	0.167237788074014	0.208088714000378	-0.0426017354785912	0.0494484601440039	-0.170296779078095	0.365563658657199	-0.385706679303474	0.329638536606461
[truncated: 20,117 more rows]
[truncated: 13 more columns]
