# Supplementary material for: Key Gene Network Related to Primary Ciliary Dyskinesia in Hippocampus of Patients With Alzheimer’s Disease Revealed by Weighted Gene Co-expression Network Analysis
Source: Research Square preprint supplement (doi:10.21203/rs.3.rs-997410/v1), 2021-10-27
Supplement: Supplementary file 2 [file 87de31013eec3dd99c15b5cf.csv]

Genes	GSM1176211	GSM1176212	GSM1176213	GSM1176214	GSM1176215	GSM1176216	GSM1176217	GSM1176218	GSM1176219	GSM1176220	GSM1176221	GSM1176222	GSM1176223	GSM1176224	GSM1176225	GSM1176226	GSM1176227	GSM1176228	GSM1176229
DYNLRB2	2.04852320767055	2.29399263291042	2.94160343555603	1.6823406392354	1.74819877248946	3.33974970916672	2.3369584497127	2.62572894390263	2.75880770323529	0.371183364654213	-0.847727916619903	1.0275782970015	1.16440118457948	3.28180536336945	2.47282598385307	3.28180536336945	1.45047490626769	0.308070220416436	2.13334176650846
ZMYND10	0.710076236913154	1.15859509431602	1.16345874199419	0.600431630028774	0.0474462901687815	1.85825557064152	1.69117674940328	1.42150727103863	0.725153521277908	0.206622660589983	0.367747784637979	0.131426416826199	0.149816002439292	2.3369584497127	0.835397253305275	2.03379094248158	0.28385239970951	0.111560121948019	1.0217639559992
DRC1	0.462445208312841	0.212221489205585	1.60076488758145	0.218272443034135	0.310991476776289	1.96389546358115	0.804925740940656	1.63779728833401	1.45451734399663	-0.29058030066883	0.103185206703955	0.0396782093064777	0.216504064785915	1.52650224496526	0.630026807023966	1.69900231907584	0.310080154459125	-0.317298218031307	0.65804690753493
DNAH5	1.47620190316615	0.565498842664281	0.874099550903947	0.810270787917914	0.498977697606162	1.95858968309243	0.514627655118571	1.13843964093739	0.290277865405519	0.255958030693249	0.113602867013643	-0.127875242418976	0.0691721831643419	1.20991525421265	1.08877083086781	1.21914080950222	0.614560208372615	-0.088341862054427	0.71944775589009
TTC25	0.215895719513798	0.669642434769174	0.565498842664281	0.370691593520243	-0.471578788489558	0.9083293390802	0.733906182500495	0.95087484424488	0.111747915474854	-0.229072849048426	0.0929001937786856	-0.0274172897993509	0.333836559734092	1.04610127661775	0.03947122481856	0.896837929454922	0.746470601676629	0.640769372037729	0.847139917110598
FOXJ1	2.24770306770654	1.65050321746489	2.24770306770654	1.94257991582363	0.808904523673306	2.65134905169127	2.98731046949752	1.76675407447868	1.76364289219279	0.539399383165851	1.4425791868667	0.180937931555668	1.187533444675	2.57138629729761	1.73686932791133	2.1882006221894	1.45894950840542	1.30034165442259	1.56615729840836
DNAAF1	0.564928427433215	0.391409531254144	0.0435230564904769	-0.0995785223992261	-0.274427924447231	0.892315961434865	0.268670038439471	0.950075496932686	0.13869291273575	-0.221123827080176	0.0678222299209472	-0.246986447475668	-0.332057729645551	0.575139424915578	0.454251748618564	0.76035875464564	-0.0131232771001962	-0.127328061993524	0.456671832837665
CFAP45	1.58927113039361	1.34111227431195	1.78644385884372	1.45047490626769	1.78112306272851	2.60223567382342	1.90768026636355	1.72676061912585	0.97346763400014	1.35355699911911	1.18630159445673	2.31929664015534	1.02100281267855	2.28215501061569	1.77805054396714	2.23762568299249	1.10896380373647	1.4782534378249	1.17242444482067
DNAAF3	-1.35166838106268	0.00851020797159543	0.283335999567172	-1.09751603152326	-1.60025851608555	1.42291981022494	0.12246937111808	1.23425810791593	-0.964860441914725	-1.46948064416223	-1.27639677469036	-1.5067833479618	-1.36062164701258	1.31040489284525	-1.48141708160722	-0.368058976026029	-0.141841906047495	-1.38535685398632	-0.895896272301467
TEKT1	1.75096864460882	1.37501512779497	1.87859702833614	0.967067409905631	0.175412713905527	3.24176173439746	1.48165718539986	1.70701945538284	1.5815638187431	0.116394066649159	0.590278841576359	-0.284929524088777	0.294598702689706	3.24176173439746	1.28447237751998	2.47282598385307	0.932735847876	0.446650285549574	1.53555729099796
CCDC114	0.452753944231861	1.58927113039361	1.04060729553654	0.368977852024074	0.566172771298235	2.3369584497127	0.871344069456806	1.67866511300685	0.799516273069771	0.53957763415949	0.260429701560442	0.477124669997364	0.538860245218238	2.91232360716019	1.20292179400148	1.12569425156039	0.507923353728298	0.183639287029992	1.21914080950222
DNAI2	-0.390377155256468	0.254590839567523	-0.145063225745797	-0.681149331767614	-0.893251695729494	1.12569425156039	0.0861598141616444	1.1670248132463	0.226809149140594	-0.370711602321835	-0.409188016078721	-0.522519908722774	-0.931607968190593	1.80118362902568	-0.465882566910954	0.974518077400518	-0.0697778939119999	-0.957412180951886	0.280100750620659
RSPH1	1.29280090104586	1.13936213372808	1.40178138383422	0.847139917110598	1.19108112498777	2.24770306770654	0.849481871961103	1.79684208901748	1.22745823972581	0.324714729908913	0.592547294460639	1.71925227906155	0.224297787021893	1.81319864080722	1.51670460231551	1.73686932791133	1.24134812889961	-0.257458836993747	1.43506851277948
DNAI1	-0.674279718270568	-0.0808433301891375	0.0678222299209472	-0.964710646161911	-0.778716630451335	1.01375905863773	-0.459317034321929	0.595042605754448	-0.299948201086987	-0.562827126785782	-0.575394391460307	-0.606826521705162	-0.155272096633978	0.336655547691518	-0.615989804509556	-0.0145574860142225	-0.166366097225108	-0.412966918761651	-0.189159035002416
HYDIN	0.129048552515231	0.489921431213473	0.512875470851399	-0.335123446344469	-0.689547223243678	1.7710404591586	0.696420982095041	0.831645124062174	0.230313769572428	-0.783602115059036	-0.394830111220069	-1.01344790226765	-0.550746907889089	1.00306648981353	0.4603401006886	0.798519531686748	0.130233180293241	-0.807626444034806	0.371500465814058
CCDC65	0.348112354247265	0.47406936469842	-0.0706247460065573	0.0082423279550115	0.161355355954297	0.74955134871623	0.213073495098841	0.176892600991399	0.105184961964891	0.0743580868820071	-0.044117065483772	0.481180621899916	0.0831035382028544	0.517889115788099	0.5671622374214	0.559250789091441	0.104645124526702	-0.101764383423455	0.282537341022355
CCDC39	0.728234783013889	0.782173933705554	-0.044117065483772	-0.4413174587644	-0.144136689659066	2.09863202211338	-0.0657084502344054	0.162227302017221	0.358858994484879	-0.229946618365238	-0.0490809702041254	-0.219061848506841	-0.0983743044808384	1.95858968309243	-0.227032416868292	0.384444544116224	0.0901723034663585	-0.422525351754539	0.742351485677134
ARMC4	-0.957990723045357	-0.641594601039037	-0.324169451704833	-0.983795955186522	-1.01667956621668	0.454251748618564	-0.468480975952207	-0.380751453076479	-0.534140320244237	-0.854728889353033	-0.833922688337576	-1.04845831986093	-0.911024721747573	0.113763428350521	-0.838052412994978	-0.559674377796585	-0.925058148104186	-0.939475966236478	-0.879961744163847
APP	0.0277776937920236	-0.521555546891365	-0.106833553596671	-0.226210410891451	-0.0631530481532278	-0.198702053520046	-0.274307066458888	-0.546396909663756	-0.0627413229140159	-0.0230344530052392	0.0653424232606869	0.261247043546759	-1.24210547589671	-0.290084018849438	-0.35583975006394	-0.319900677244153	-0.6079566578302	-0.400261757734723	-0.024811300196708
ADAM10	0.00784568878822225	0.567927212292501	0.41294665694329	0.409902167046181	-0.241411019576951	0.516156719785542	0.0944530931710061	-0.267695698996443	1.02031963478346	-0.574459257954829	0.566708621607468	-0.350749039344707	-0.623867796416079	0.386242798769202	0.25864001050649	0.365098948624761	0.281490185125585	0.0439863578167144	-0.00867116717114545
HFE	0.0213204197140864	0.187677026879786	-0.023823417217671	-0.049505193145676	0.020354825049688	-0.0645279464095444	-0.086127460247737	0.0781202869181846	-0.106183362626661	0.0938590287355694	-0.00988440942333063	-0.128135925755454	0.110895901258518	-0.10832046445093	-0.167912455520843	0.152095671665654	-0.124742115259385	0.113448223335881	-0.0652493134593305
APOE	-0.0460004192156155	0.624594066505628	1.04143186714223	0.108263528058425	0.713620680960152	0.201082480771763	0.232554536818971	0.191578994935086	0.328732526230553	-0.0384799768773384	-0.00294491839110414	-0.259026238608392	1.4032089574973	-0.0885182046127383	0.403979627715995	0.832508510000864	0.589162347771352	1.42150727103863	0.291546037424717
MAPT	-0.0803821352282158	-0.82565906114381	-0.541755243237555	-0.00651213429275322	0.206451665057038	-0.614494494681361	0.0813584217267181	-0.0669222214166919	-0.589355386975902	0.179639136759591	-0.494896945732468	0.0158017099555748	-0.986045054775568	-0.189007075720237	0.0426046108475033	-0.220244578436699	-0.252780613074848	-0.243807457708451	-0.260720423073078
TREM2	1.36404960372293	1.95304040584343	1.60391588258498	2.22925076507367	-0.0214085986712371	1.1301622477106	2.05987026403466	-0.412043606638415	1.92735849846808	0.499174185146373	1.93676001892142	1.7710404591586	-1.00538060246679	1.43855572490243	1.61715605155876	2.17408270537852	1.44731803426544	0.12627003202311	1.93676001892142
PSEN1	-0.0536622222327935	0.0977912176973648	0.176117326898306	0.176284985103989	-0.15318172106337	0.414710006329968	0.0355359586082016	-0.129731976095425	0.503439613112744	-0.308544469902788	-0.0273219282893138	-0.364929278857532	-0.331304867132768	0.450698178297946	-0.0967207637290154	0.0733291849385341	-0.0929469287379777	0.141491604592667	-0.542062511476744
BACE1	-0.20314161993085	-0.623202785661687	0.0468641022419374	-0.213862963171929	-0.114421303160415	0.593116115728174	0.00439042113750345	-0.303795626783547	0.687640982286079	-0.320391041210814	-0.302151153654963	-0.17195095380078	-0.707241462691716	0.744995520068872	-0.0376214442846604	-0.228486503502738	-0.715993079484317	0.241630915964666	-0.756641232193362
IDE	-0.375130930554211	0.278467429640554	0.123452177094156	0.354198046249326	-0.622543012813912	-0.000386143401324833	-0.158079006980331	-0.443574160610757	0.267357460230535	-0.31872737313643	0.0288024984254722	-0.495766288688349	-0.235028617146009	0.22152569778029	0.0850034790866171	-0.111000121258812	-0.134938071716567	-0.390011048677394	0.127610891973672
IL1B	0.289920604772292	0.667600736710345	0.203741912595967	-0.149217401240238	0.038500860624296	1.44858179942414	0.0515073215540546	0.535885621549069	0.0863352762465887	0.294911612673096	0.432690513751206	0.672909300764625	-0.0884059945622811	-0.0170770606411823	2.83672238816462	0.232004761273131	3.20154635152172	-0.605397678730309	3.01470940102854
INSR	0.734968471994248	0.0941582472841832	-0.215893813797152	0.377296318811225	-0.445416683889679	0.201547251107168	0.605306484560038	0.319600825361579	0.275178488806687	0.405729222978172	0.667101374246826	0.235930785930014	0.261684936262294	0.678598931740881	-0.490594602157111	-0.111335951430133	0.0177047520111874	0.364278620838459	-0.411140278320014
NPY	-1.23460494134315	-1.53110038364527	-1.16282857783722	-2.71667723528686	0.5269450548592	-0.252989335422739	-2.56497829926109	-2.1498390202667	-0.0560443905224948	-2.49459191009745	-1.28061349639769	1.99425579920629	-0.747207951986806	-2.08074323802862	1.28769611993276	-1.45947127460292	-1.32237613378054	-2.09088708195787	0.50622889924865
BCL2	0.115885002743745	0.247903615540303	-0.0221291364718937	0.165369883613669	0.0924253085409956	-0.239970442533695	0.493025866561073	0.610607811613474	0.0937391803110925	0.148347912354636	0.12306125846859	-0.191242357325661	1.08731805878396	-0.213278704139061	-0.360998840454727	0.395386315454556	0.16883432317115	0.535439846334126	0.120288381585487
BDNF	0.489635413129462	-0.903961674110332	-1.63538745535045	0.0709976475664674	-0.773511132085712	-1.96325712507919	0.0143683127569051	0.799906888268437	-2.36062831127087	-1.68793597583729	-1.62057196813678	-0.851003623436168	-1.80593746777729	-1.69704498407085	0.553644364992035	0.161919716800252	1.53791718245987	-2.06012647267565	0.195457681215623
CASP3	-0.0221532099589685	0.325112264532403	0.600731241085541	0.231321831191078	0.488349923566325	0.0829723095299845	0.211339367767423	0.0940628236763179	0.543064683238507	0.0174471369707979	-0.00725144145491509	-0.221842467800029	-0.0170770606411823	0.07124913266407	-0.537923124166109	-0.2523220203835	0.662663807868673	0.341050796498694	0.380136310961739
IGF2	-0.529227517608616	-0.306746810845991	1.5815638187431	-0.00563145005508892	-0.16764026240061	0.390216086212841	0.0603326162768039	1.42507896885458	-0.0595397082375176	1.20527157039783	0.0451228836973345	-0.689547223243678	0.711938254248767	0.437792619861776	0.18729716449605	0.684748205669309	0.578300452419967	0.990583864099083	0.102150175347522
IGF1R	0.356614602077218	-0.342765701335482	-0.364528598346285	0.330995479410015	-0.570112366852946	-0.283884808041667	0.291546037424717	0.0590510829932517	-0.25575931953413	-0.329959184758367	0.0164812835684024	-0.572223698663591	-0.0246567417592717	-0.114601886842739	-0.645399854782632	-0.235442462862513	-0.216442883189393	-0.326421241179653	-0.486347161282527
BAX	-0.0256297337998523	-0.00568708601079231	-0.346717125101453	0.137376206854859	-0.157084657433676	-0.537778508455972	0.511780310504082	0.0531340285459748	-0.162811870092261	-0.245940826329606	-0.00775362629135618	-0.0985105894069867	0.000392306444443799	-0.208017464564891	-0.0557412900768174	0.0101898850414963	0.110277530527795	0.789594646149055	0.368025270647379
ABCA7	-0.0234894064519156	-0.527197433434131	-0.766625012196009	-0.172625842636152	-0.61184333630899	-1.6098955492248	-0.0155087680178837	-0.607655947672728	-0.813036860722997	-0.690646161580996	-0.14662858225807	-0.562625133887758	0.0684691955826431	-0.127195510132162	-0.520860924105629	-1.91420460241402	-0.15652044509519	0.163404716093073	-0.240382065029936
TOMM40	0.0671366786763517	-0.518889390993288	-0.518582608451053	-0.132879543909893	-0.253996690043816	-0.539695612452313	-0.00725144145491509	0.0459169803254093	-0.362995820203337	0.00709516028682758	-0.103385462876816	-0.139096162430343	-0.0681187579509938	-0.269368584401688	-0.120125715232439	0.144877924891601	-0.289163539703343	0.282846666971167	0.144591480441851
CLU	0.542340209931121	1.17806819400419	1.22874349653564	0.983278283595176	1.29091325976806	1.15144109830826	0.42412963237916	1.18879846283994	0.979501477856174	0.279252126744746	0.136731158648077	1.18879846283994	0.412574166536439	0.266810652000066	1.17706890735081	1.15634233617004	0.771913570744067	-0.00953249504649159	0.689060588332281
A2M	-0.712497925955928	0.114690810753777	0.0191191899910842	-0.215383452305929	-0.754478383896636	-0.0493807948595469	-0.581835151750546	-0.123835438427544	-0.0708601270346256	-0.755439252745706	0.218272443034135	-0.419168611043528	-0.131994158980376	-0.275228155752656	-0.687771393256269	0.181448915859264	-0.165564450703922	0.0210298732083402	-0.123676648015149
CD2AP	-0.202664594104524	0.215166612178612	0.185247755439874	0.0417052542749783	-0.23582678977751	0.145952544241572	0.06604161064432	0.491082367007096	0.00181540726342112	-0.0102991479842696	0.17453333142227	0.0882819095439696	0.569142195309311	-0.0121481320968618	-0.31790850385375	0.234125883895141	0.361188537849075	0.346821278928002	0.0898196492504484
BIN1	0.14104706519639	0.116243699710395	-0.0117801959459232	0.41710750341557	0.215320057655122	0.600731241085541	0.429217974481868	-0.120713411269031	0.150278490806439	0.742717335165383	0.077432306848086	-0.268329940897476	-0.645579544754884	0.571323057254422	0.0320592320106076	-0.177971506603088	0.109706161109196	0.746918253607694	0.470433194519807
APOC1	0.432424132432698	1.29280090104586	0.454557483250402	0.323320783089624	0.764949882376538	0.222160646417026	0.709609121717935	0.22942553792584	0.162935126531739	0.607630886429412	0.561943350762959	0.194873457255402	0.965464820169706	0.576875503487584	0.722484908017896	0.73083364171512	0.43051234901595	0.156257487374019	0.632666865101807
NOS3	0.275307946443945	0.572269883778372	0.0398049068335547	-0.113985343770943	-0.272339276405888	0.0300253362024517	0.17558701869776	0.871344069456806	-0.311743865424836	0.347115319923361	0.551629427740286	0.436356353997537	0.537676657347317	0.235654682788383	0.362593632115523	0.319161707733817	0.120865270201698	0.549135812791539	0.308649267864404
PSEN2	-0.331126873280021	-0.535445072271712	-0.298475152231785	-0.396854084348788	0.0447992397251885	-0.646503250372122	-0.920574906971659	-0.292343168399608	-0.472493971620366	-0.579813159461243	-1.00353678517515	-0.319103850155324	-0.0426188782987179	-1.27809679152274	0.394070215003264	-0.095025437167446	-0.263973753140787	-0.282552685389689	0.0241608764855145
SORL1	0.613989622331193	0.365777010579755	0.339315782454543	0.353733074328018	0.0832300454514834	0.0337292461466439	0.44224550392655	0.205090441602319	0.335054925230978	-0.25366880311444	0.19712490352987	-0.0247137254934308	-0.38632683131455	0.353908140095746	0.00832362101047553	0.581621430703663	0.394636986812048	-0.0559827640075425	-0.00897135555791012
PICALM	0.0382468634606073	0.266687245115811	0.109301527481098	-0.00491242773689646	-0.316750913242948	0.455586128096149	-0.0110323976716846	-0.446891581017165	0.396611499394604	-0.0737073261354331	0.370691593520243	-0.245612058046128	-0.386591884146834	0.362593632115523	0.234013981372093	0.330550776221393	0.194580031731438	-0.0705030669529262	0.142609908155465
INPP5D	0.155522459786149	0.775543298840924	0.633779635652001	0.390216086212841	-0.225359104255282	0.38783558506774	0.520077244958409	0.342479663651981	0.18674926330369	0.494561783994151	0.803679490062184	0.343870202099749	-0.403938174149118	0.249043818414873	0.179545887292982	0.785377957438325	0.625163407114121	0.00426019147217176	0.856409091648768
